# Supplementary material for: Innovative regioselective synthesis of dispiro[fluorene-9,3′-pyrazole-5′,4″-pyrazolidines]: experimental and computational study
Source: Royal Society of Chemistry journal article supplement (doi:10.1039/d6ra01559j), 2026-05-11

**SUPPORTING INFORMATION FOR**

**Innovative Regioselective Synthesis of Dispiro[fluorene-  
9,3'-pyrazole-5',4''-pyrazolidines]: Experimental and  
Computational Study**

Essam M. Hussein<sup>a,\*</sup>, Ziad Moussa<sup>b,\*</sup>, Munirah M. Al-Rooqi<sup>c</sup>, Saeed S.  
Samman<sup>d</sup>, Abdulrahman A. Alsimaree<sup>e</sup>, Rabab S. Jassas<sup>f</sup>, Saleh A. Ahmed<sup>c,\*</sup>

<sup>a</sup>*Chemistry Chemistry, Faculty of Science, Assiut University, 71516 Assiut, Egypt*

<sup>b</sup>*Department of Chemistry, College of Science, United Arab Emirates University, P.O. Box 15551, Al Ain, United Arab Emirates*

<sup>c</sup>*Department of Chemistry, Faculty of Science, Umm Al-Qura University, 21955 Makkah, Saudi Arabia*

<sup>d</sup>*Department of Basic Science and Technologies, Applied College, Taibah University, 42353 Madina, Saudi Arabia*

<sup>e</sup>*Department of Chemistry, College of Science and Humanities, Shaqra University, Shaqra, Saudi Arabia*

<sup>f</sup>*Department of Chemistry, Jamoum University College, Umm Al-Qura University, 21955 Makkah, Saudi Arabia*

**Correspondence may be addressed to:**

Essam M. Hussein, <https://orcid.org/0000-0003-4778-540X>; E-mail:  
[amhfarghaly@uqu.edu.sa](mailto:amhfarghaly@uqu.edu.sa), [essam.hussein78@yahoo.com](mailto:essam.hussein78@yahoo.com); Ziad Mousaa,  
<https://orcid.org/0000-0002-3365-0451>; E-mail: [zmoussa@uaeu.ac.ae](mailto:zmoussa@uaeu.ac.ae); Saleh A. Ahmed,  
<https://orcid.org/0000-0002-2364-0380>; E-mail: [saahmed@uqu.edu.sa](mailto:saahmed@uqu.edu.sa),  
[saleh\\_63@hotmail.com](mailto:saleh_63@hotmail.com)

|                                                                                                                                                                                                                                               |     |
|-----------------------------------------------------------------------------------------------------------------------------------------------------------------------------------------------------------------------------------------------|-----|
| (E)/(Z)-4-(4-benzylidene)-1-phenylpyrazolidine-3,5-dione (3a)                                                                                                                                                                                 | S3  |
| (E)/(Z)-4-(4-methoxybenzylidene)-1-phenylpyrazolidine-3,5-dione (3b)                                                                                                                                                                          | S6  |
| (E)/(Z)-4-(4-methylbenzylidene)-1-phenylpyrazolidine-3,5-dione (3c)                                                                                                                                                                           | S9  |
| (E)/(Z)-4-(4-chlorobenzylidene)-1-phenylpyrazolidine-3,5-dione (3d)                                                                                                                                                                           | S12 |
| (E)/(Z)-4-(4-fluorobenzylidene)-1-phenylpyrazolidine-3,5-dione (3e)                                                                                                                                                                           | S15 |
| (E)/(Z)-4-(4-cyanobenzylidene)-1-phenylpyrazolidine-3,5-dione (3f)                                                                                                                                                                            | S19 |
| (E)/(Z)-4-(4-nitrobenzylidene)-1-phenylpyrazolidine-3,5-dione (3g)                                                                                                                                                                            | S22 |
| (4'R,5'R)-1'',4'-diphenyl-4'H-dispiro[fluorene-9,3'-pyrazole-5',4''-pyrazolidine]-3'',5''-dione (5a) and (4'S,5'R)-1'',4'-diphenyl-4'H-dispiro[fluorene-9,3'-pyrazole-5',4''-pyrazolidine]-3'',5''-dione (5'a)                                | S25 |
| (4'R,5'R)-1''-phenyl-4'-(p-tolyl)-4'H-dispiro[fluorene-9,3'-pyrazole-5',4''-pyrazolidine]-3'',5''-dione (5c) and (4'S,5'R)-1''-phenyl-4'-(p-tolyl)-4'H-dispiro[fluorene-9,3'-pyrazole-5',4''-pyrazolidine]-3'',5''-dione (5'c)                | S31 |
| (4'R,5'R)-1''-phenyl-4'-(p-tolyl)-4'H-dispiro[fluorene-9,3'-pyrazole-5',4''-pyrazolidine]-3'',5''-dione (5c) and (4'S,5'R)-1''-phenyl-4'-(p-tolyl)-4'H-dispiro[fluorene-9,3'-pyrazole-5',4''-pyrazolidine]-3'',5''-dione (5'c)                | S33 |
| ((4'R,5'R)-4'-(4-chlorophenyl)-1''-phenyl-4'H-dispiro[fluorene-9,3'-pyrazole-5',4''-pyrazolidine]-3'',5''-dione (5d) and (4'S,5'R)-4'-(4-chlorophenyl)-1''-phenyl-4'H-dispiro[fluorene-9,3'-pyrazole-5',4''-pyrazolidine]-3'',5''-dione (5'd) | S39 |
| (4'R,5'R)-4'-(4-fluorophenyl)-1''-phenyl-4'H-dispiro[fluorene-9,3'-pyrazole-5',4''-pyrazolidine]-3'',5''-dione (5e) and (4'S,5'R)-4'-(4-fluorophenyl)-1''-phenyl-4'H-dispiro[fluorene-9,3'-pyrazole-5',4''-pyrazolidine]-3'',5''-dione (5'e)  | S46 |
| (4'R,5'R)-4'-(4-cyanophenyl)-1''-phenyl-4'H-dispiro[fluorene-9,3'-pyrazole-5',4''-pyrazolidine]-3'',5''-dione (5f) and (4'S,5'R)-4'-(4-cyanophenyl)-1''-phenyl-4'H-dispiro[fluorene-9,3'-pyrazole-5',4''-pyrazolidine]-3'',5''-dione (5'f)    | S52 |
| (4'R,5'R)-4'-(4-nitrophenyl)-1''-phenyl-4'H-dispiro[fluorene-9,3'-pyrazole-5',4''-pyrazolidine]-3'',5''-dione (5g) and (4'S,5'R)-4'-(4-nitrophenyl)-1''-phenyl-4'H-dispiro[fluorene-9,3'-pyrazole-5',4''-pyrazolidine]-3'',5''-dione (5'g)    | S58 |

<sup>1</sup>H NMR spectrum of (E)/(Z)-4-(4-benzylidene)-1-phenylpyrazolidine-3,5-dione (3a)

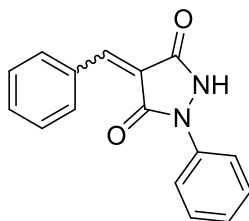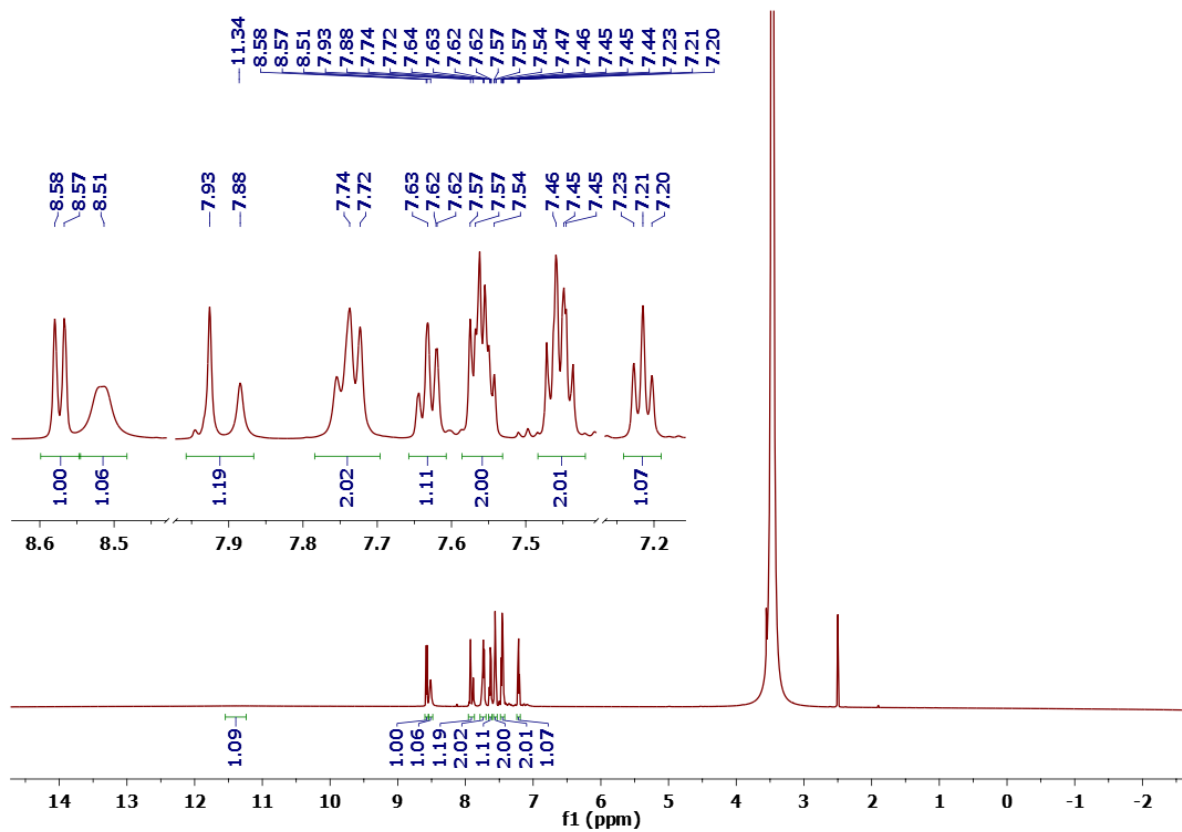

<sup>13</sup>C NMR spectrum of (E)/(Z)-4-(4-benzylidene)-1-phenylpyrazolidine-3,5-dione (3a)

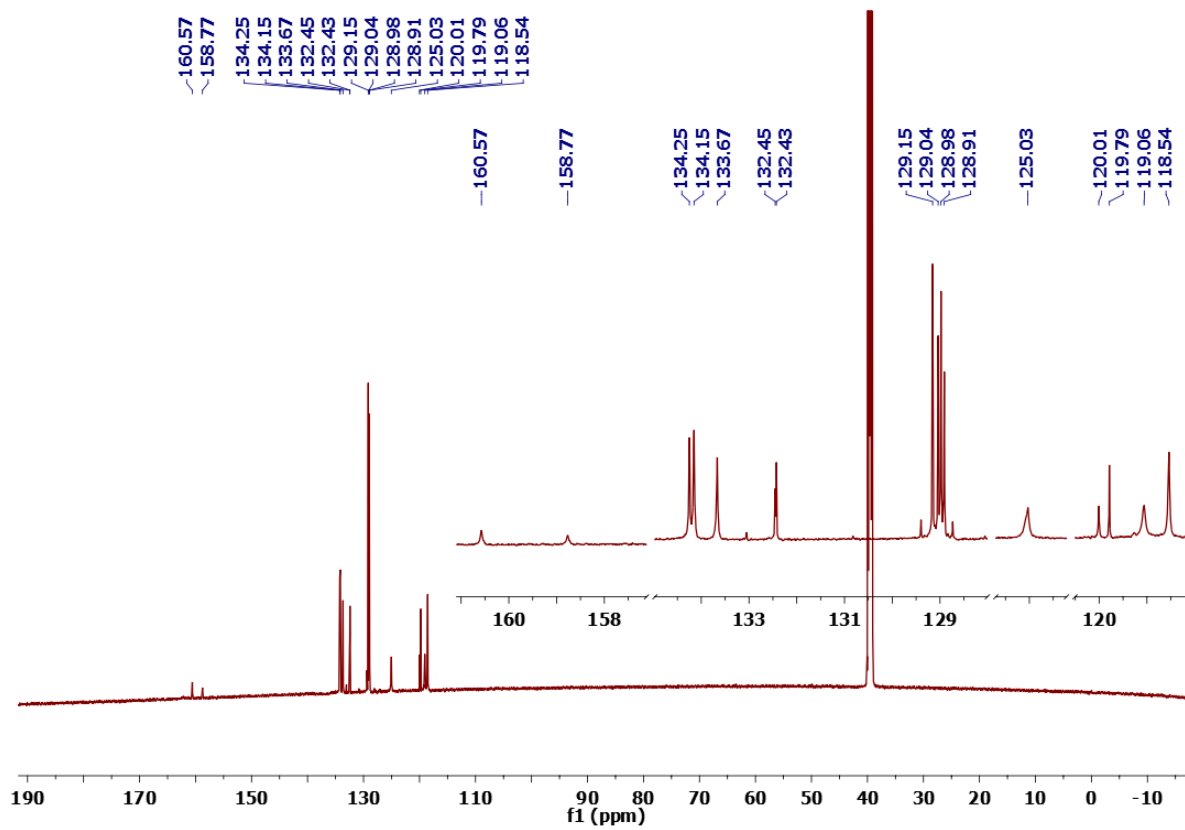

**<sup>13</sup>C DEPT-135 NMR spectrum of (E)/(Z)-4-(4-benzylidene)-1-phenylpyrazolidine-3,5-dione (3a)**

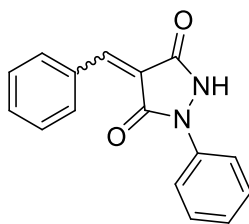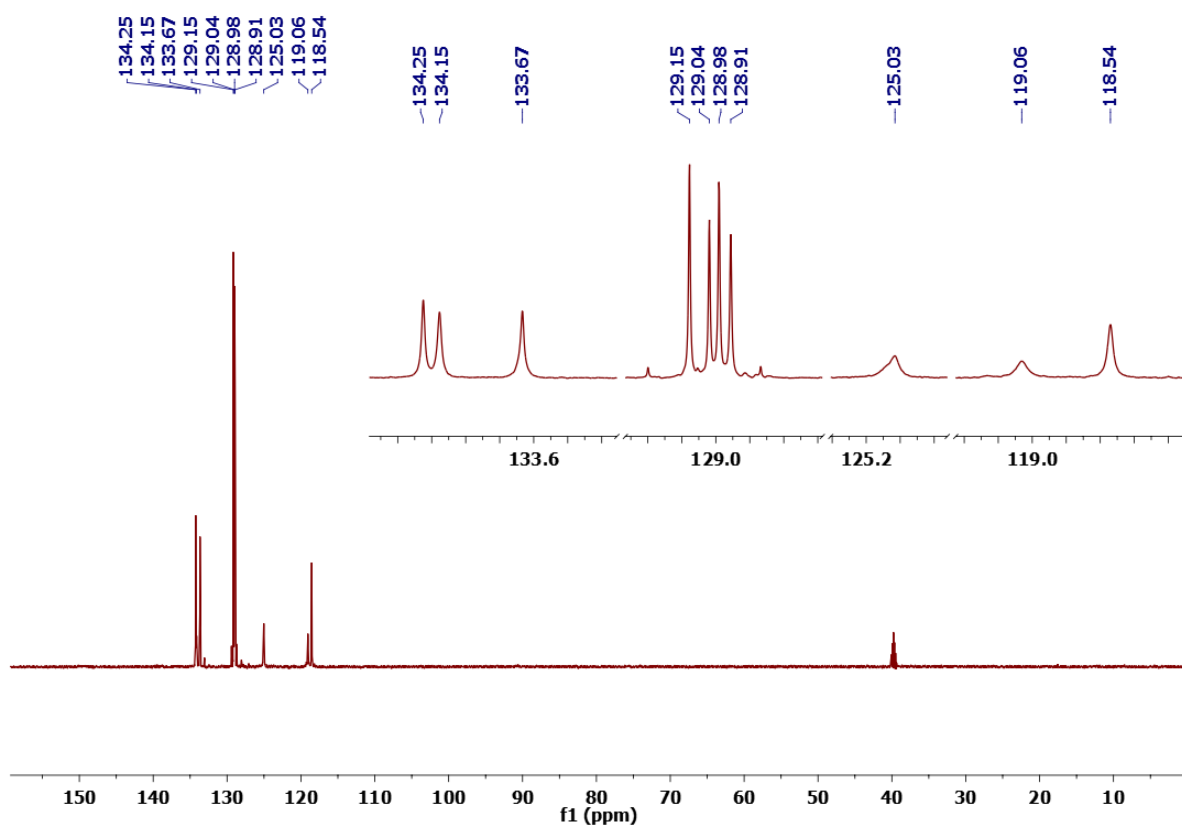

**<sup>1</sup>H NMR spectrum of (E)/(Z)-4-(4-methoxybenzylidene)-1-phenylpyrazolidine-3,5-dione (3b)**

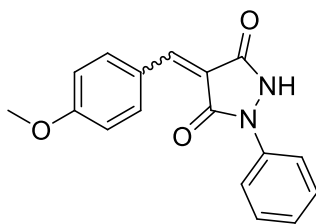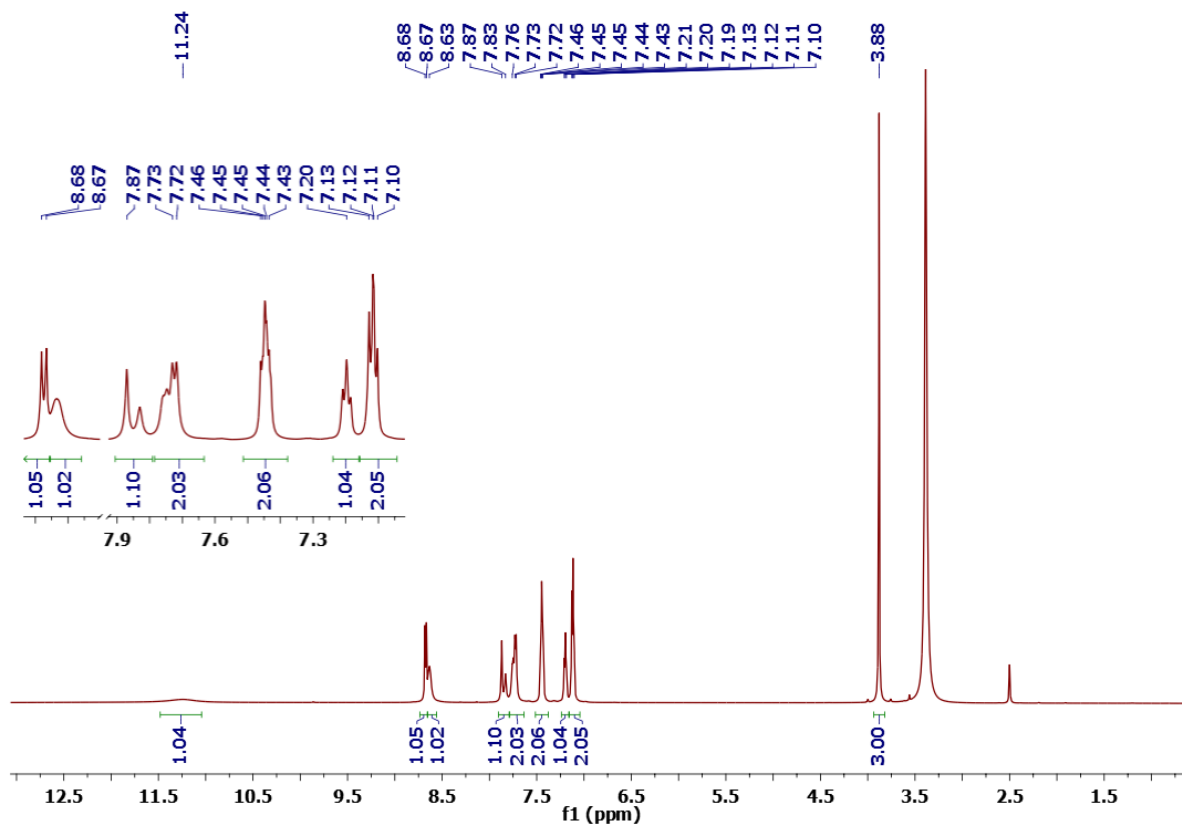

<sup>13</sup>C NMR spectrum of (E)/(Z)-4-(4-methoxybenzylidene)-1-phenylpyrazolidine-3,5-dione (3b)

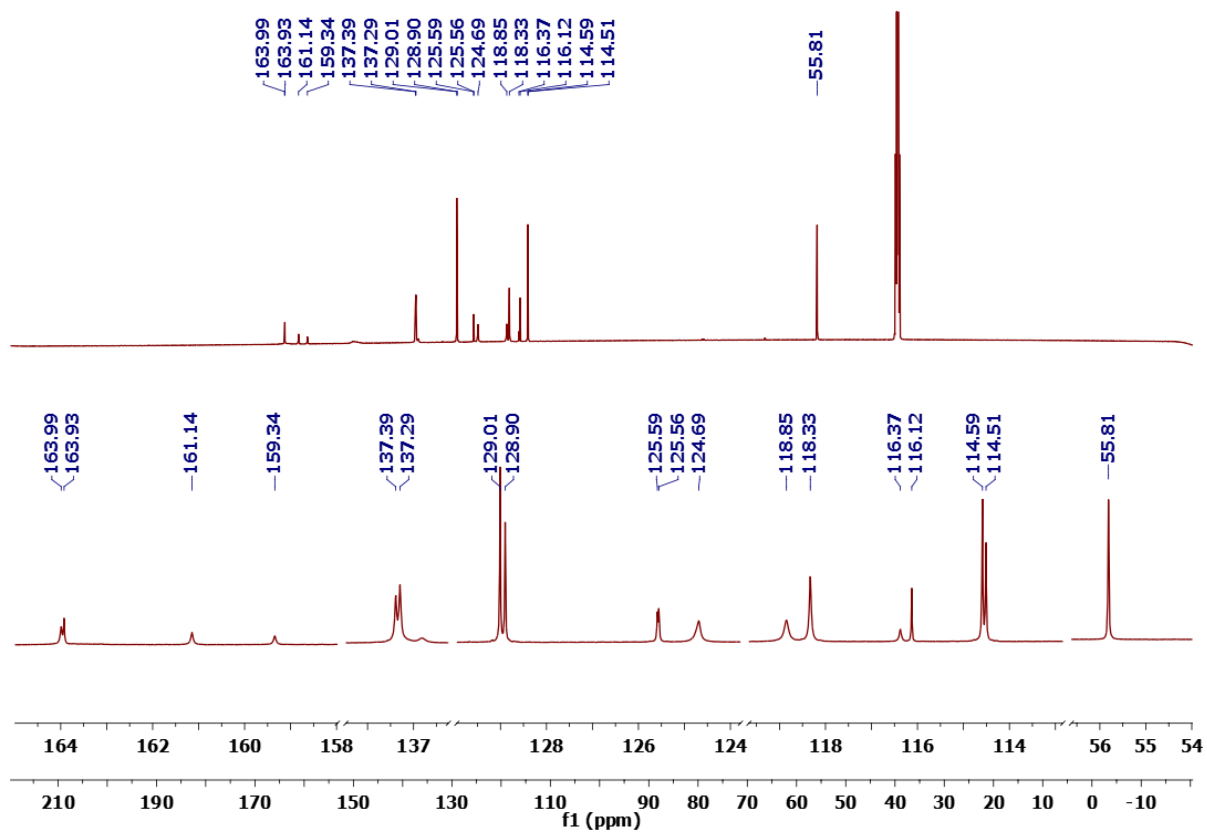

<sup>13</sup>C DEPT-135 NMR spectrum of (E)/(Z)-4-(4-methoxybenzylidene)-1-phenylpyrazolidine-3,5-dione (3b)

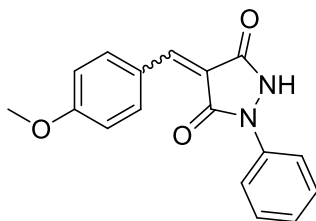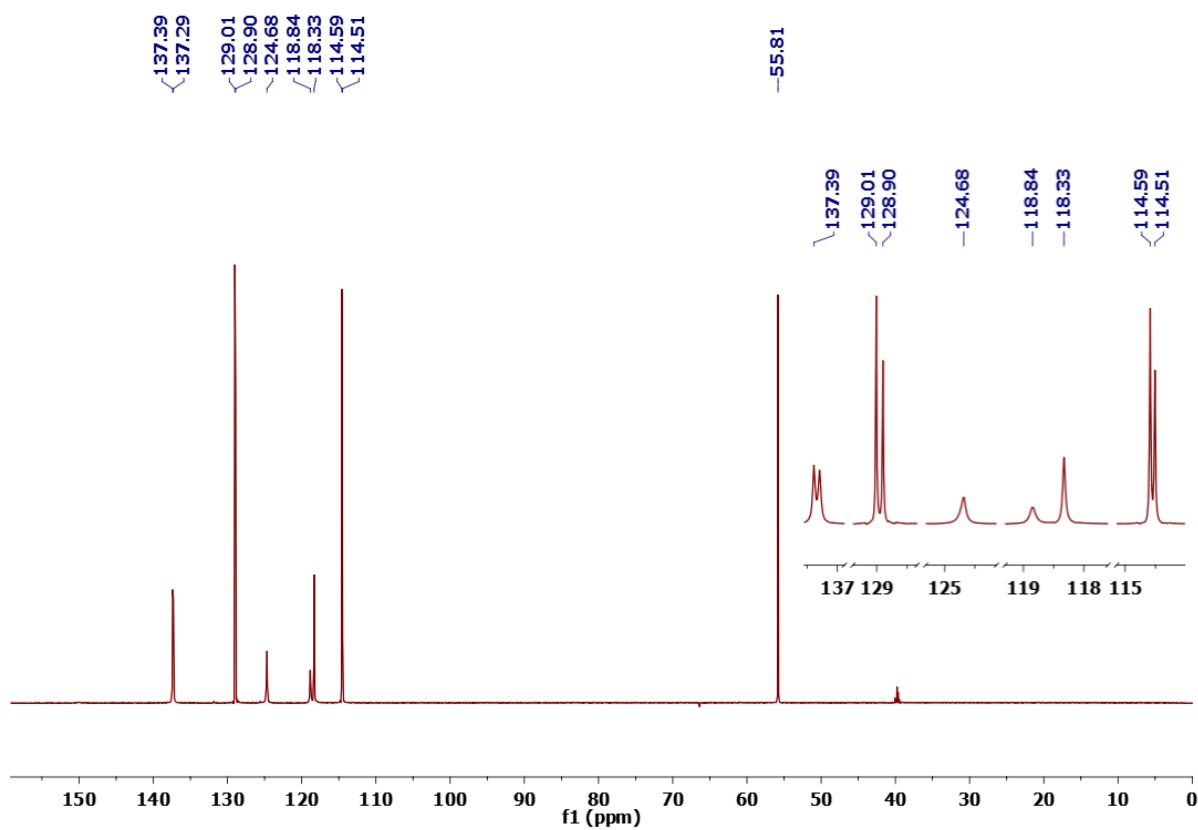

**<sup>1</sup>H NMR spectrum of (E)/(Z)-4-(4-methylbenzylidene)-1-phenylpyrazolidine-3,5-dione (3c)**

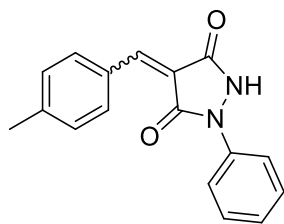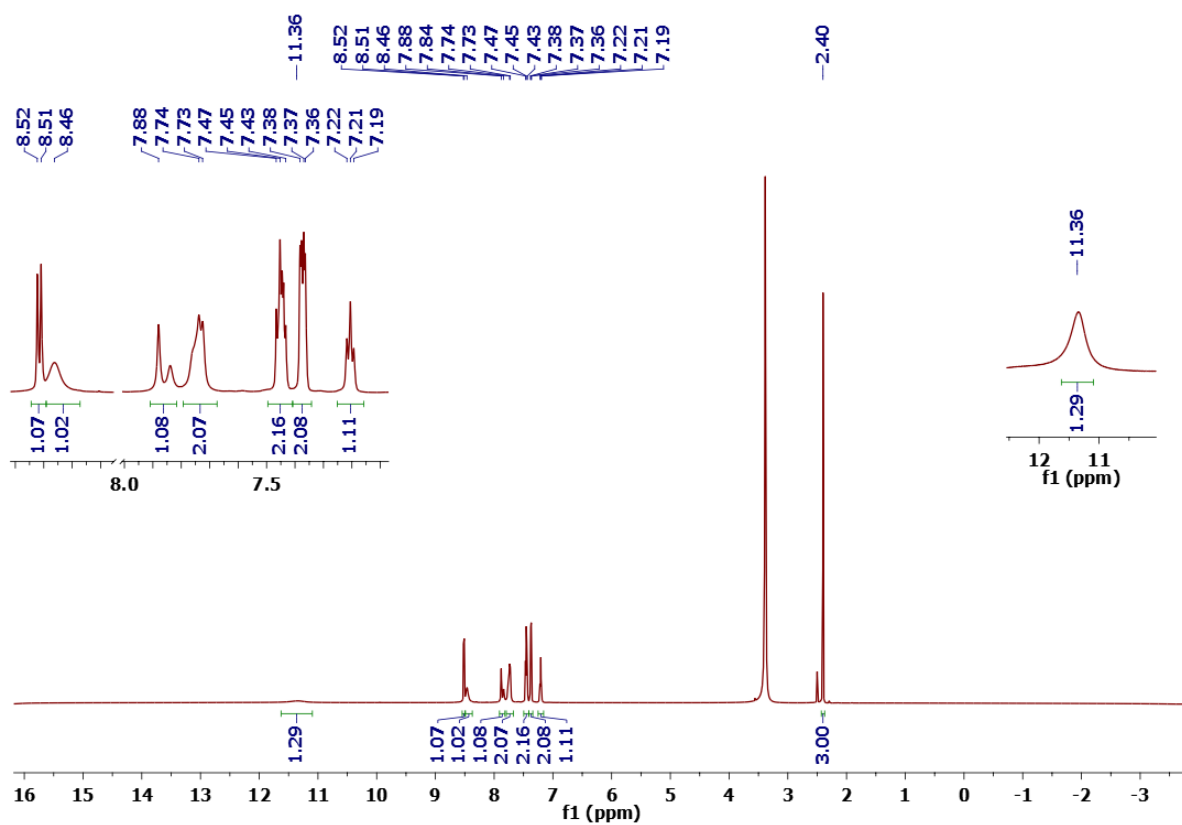

<sup>13</sup>C NMR spectrum of (E)/(Z)-4-(4-methylbenzylidene)-1-phenylpyrazolidine-3,5-dione (3c)

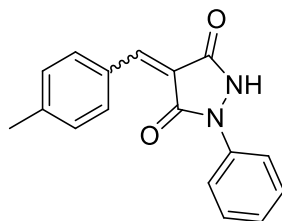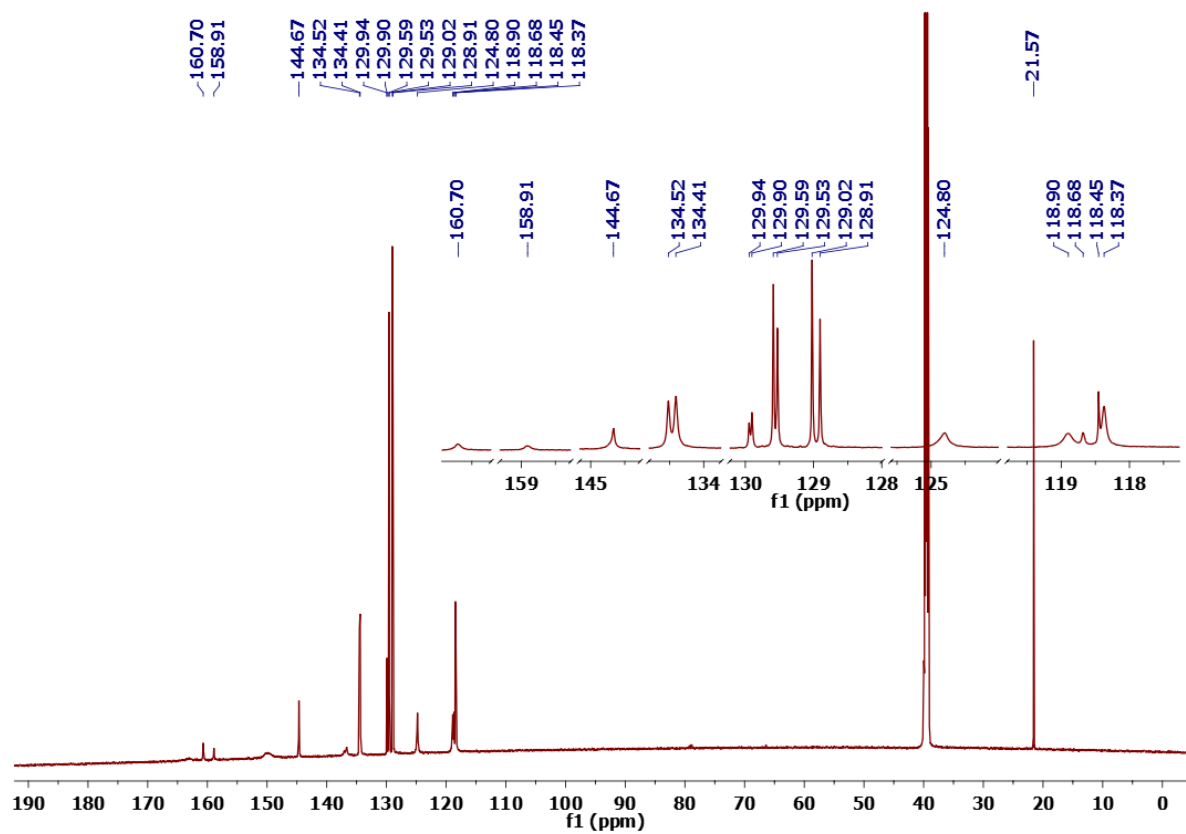

<sup>13</sup>C DEPT-135 NMR spectrum of (E)/(Z)-4-(4-methylbenzylidene)-1-phenylpyrazolidine-3,5-dione (3c)

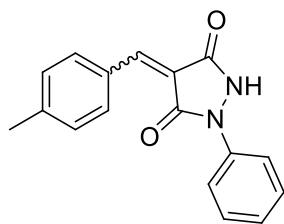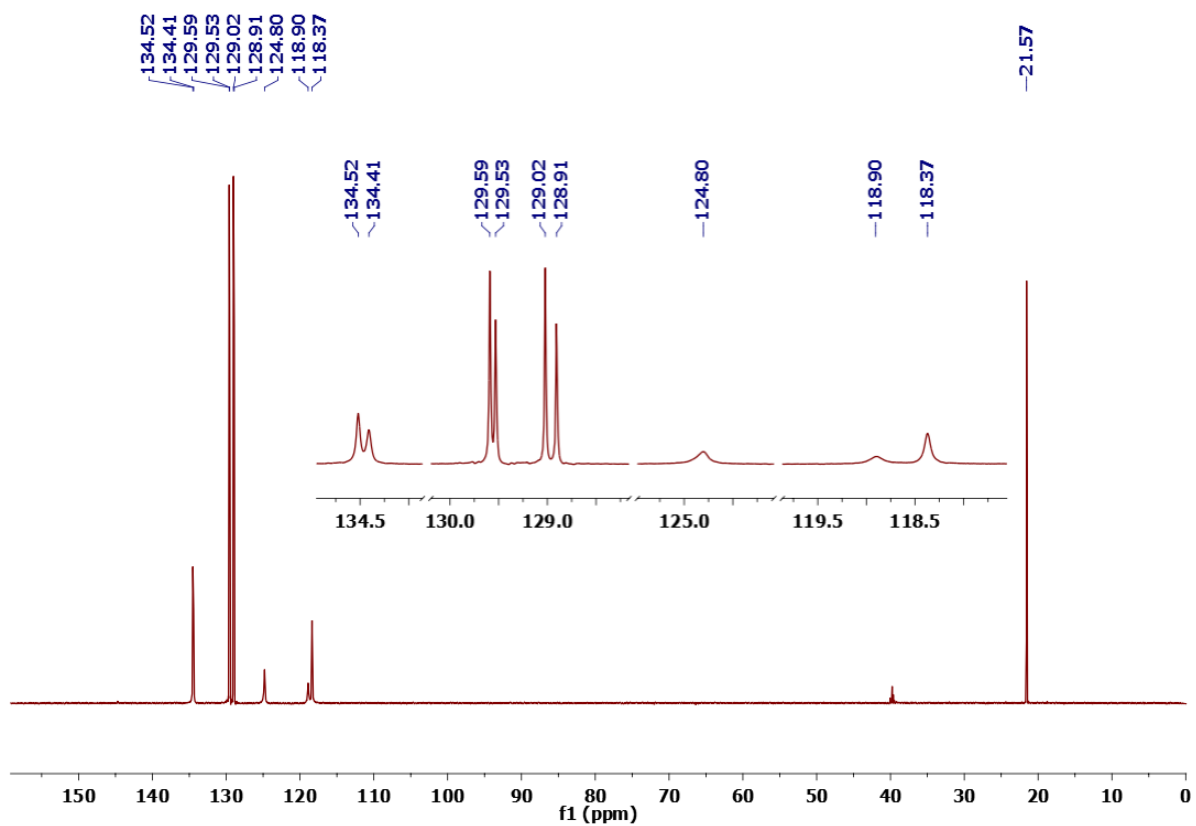

**<sup>1</sup>H NMR spectrum of (E)/(Z)-4-(4-chlorobenzylidene)-1-phenylpyrazolidine-3,5-dione (3d)**

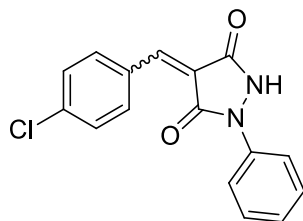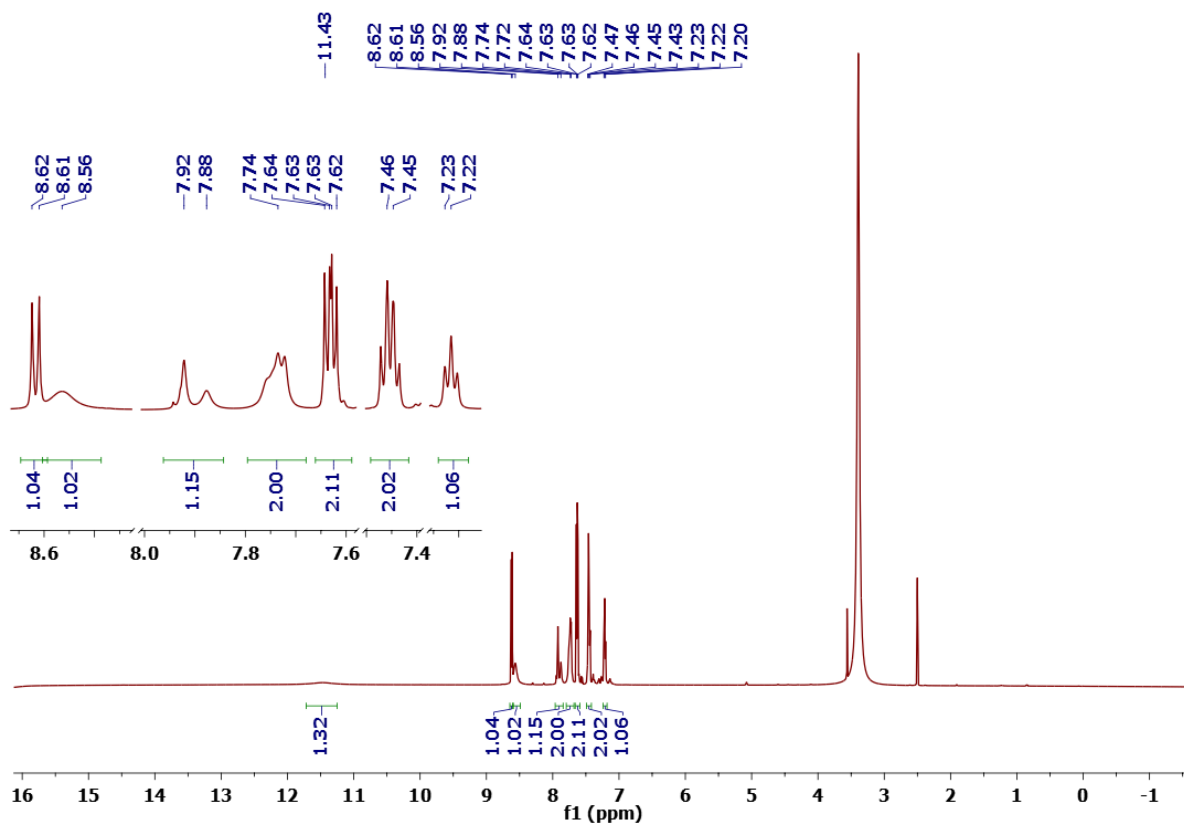

<sup>13</sup>C NMR spectrum of (E)/(Z)-4-(4-chlorobenzylidene)-1-phenylpyrazolidine-3,5-dione (3d)

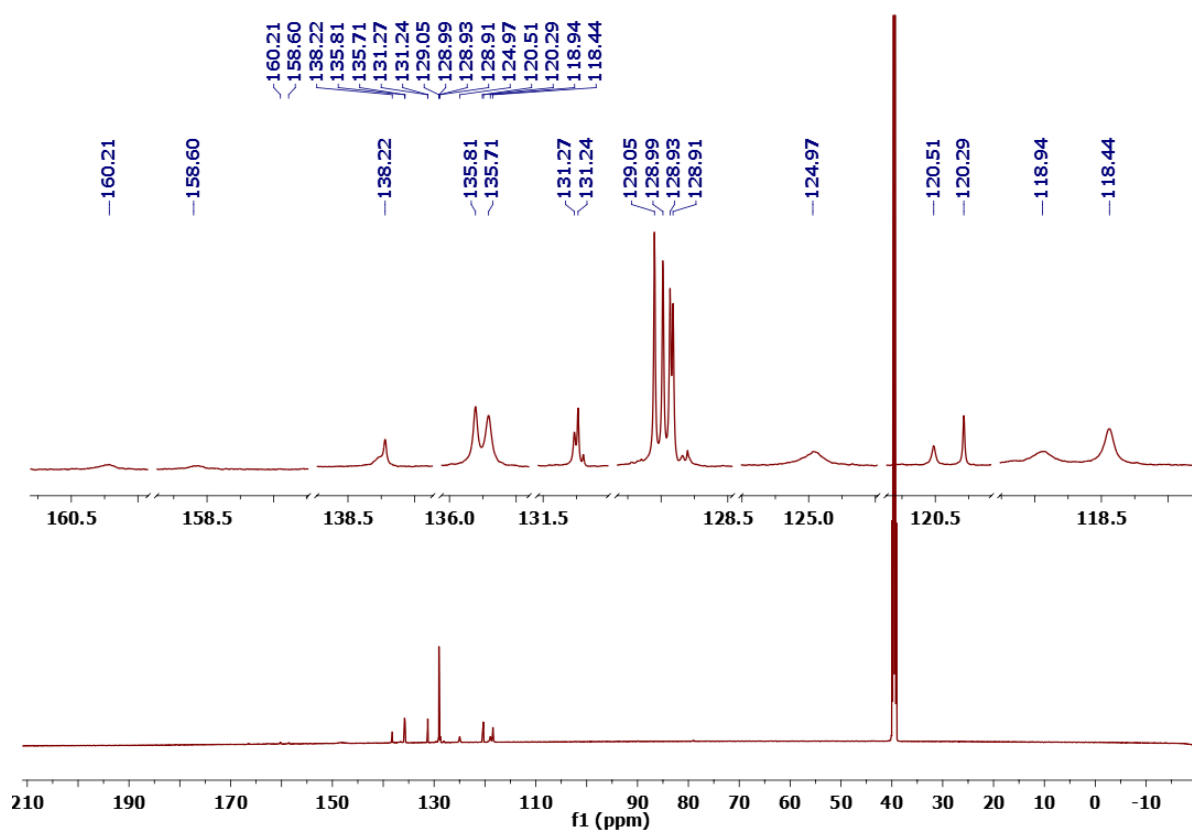

**<sup>13</sup>C DEPT-135 NMR spectrum of (E)/(Z)-4-(4-chlorobenzylidene)-1-phenylpyrazolidine-3,5-dione (3d)**

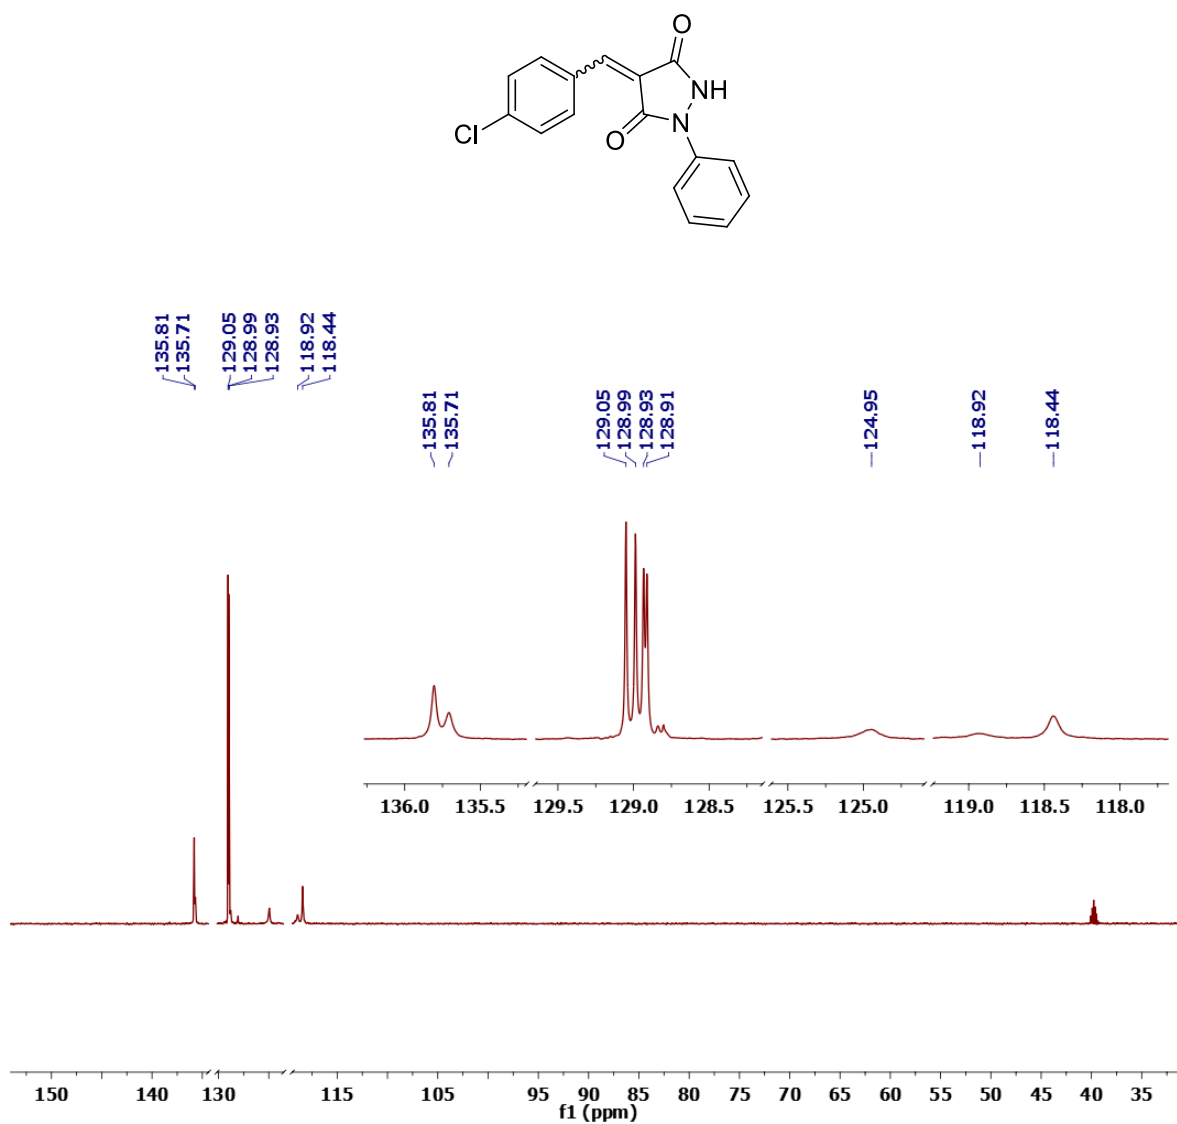

<sup>1</sup>H NMR spectrum of (E)/(Z)-4-(4-fluorobenzylidene)-1-phenylpyrazolidine-3,5-dione (3e)

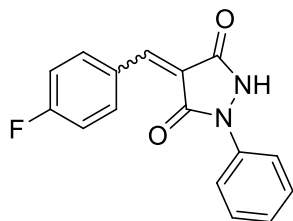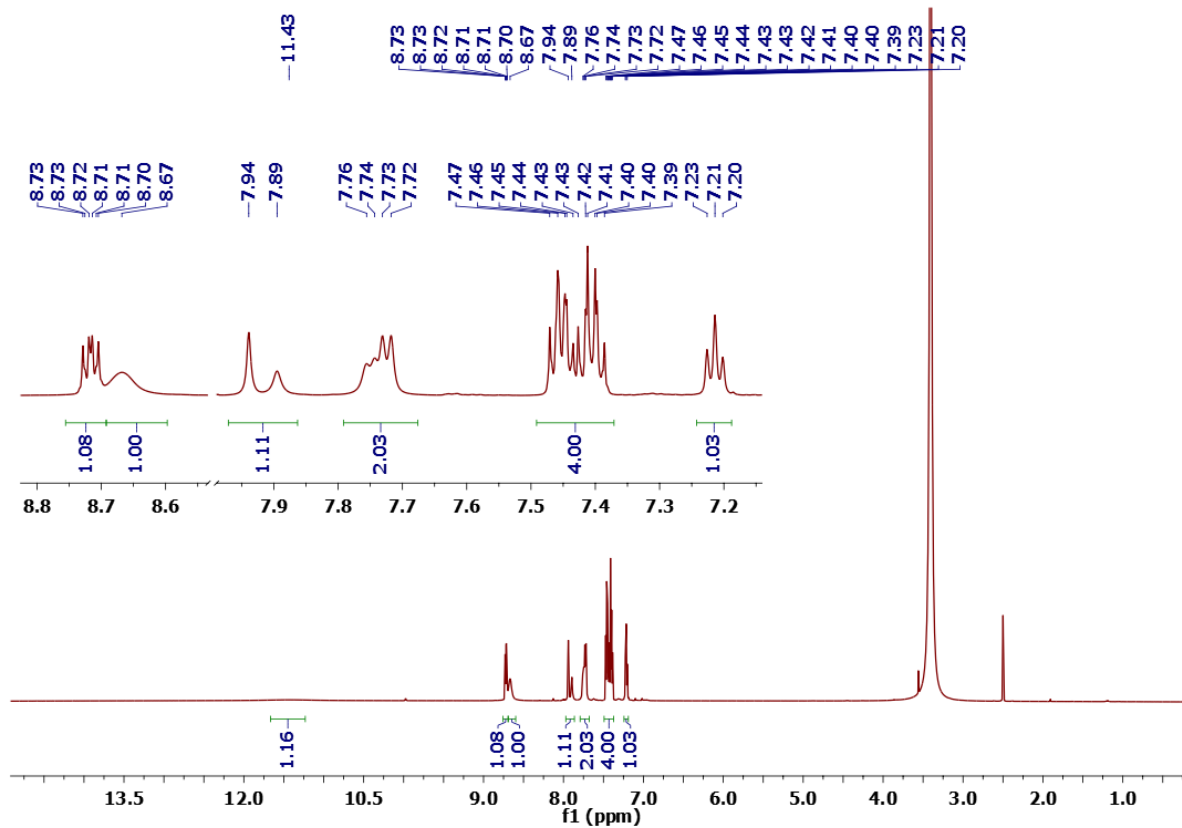

<sup>13</sup>C NMR spectrum of (E)/(Z)-4-(4-fluorobenzylidene)-1-phenylpyrazolidine-3,5-dione (3e)

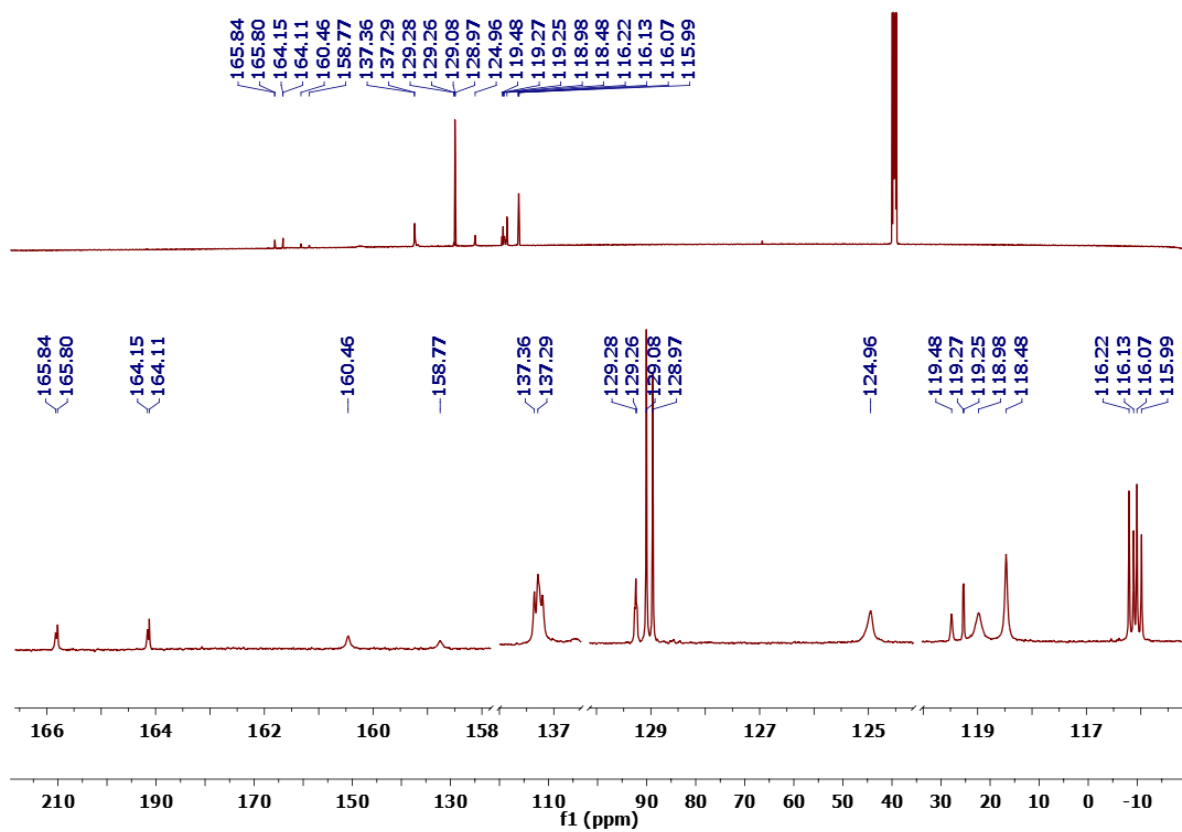

<sup>13</sup>C DEPT-135 NMR spectrum of (E)/(Z)-4-(4-fluorobenzylidene)-1-phenylpyrazolidine-3,5-dione (3e)

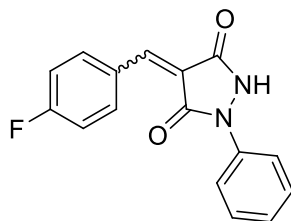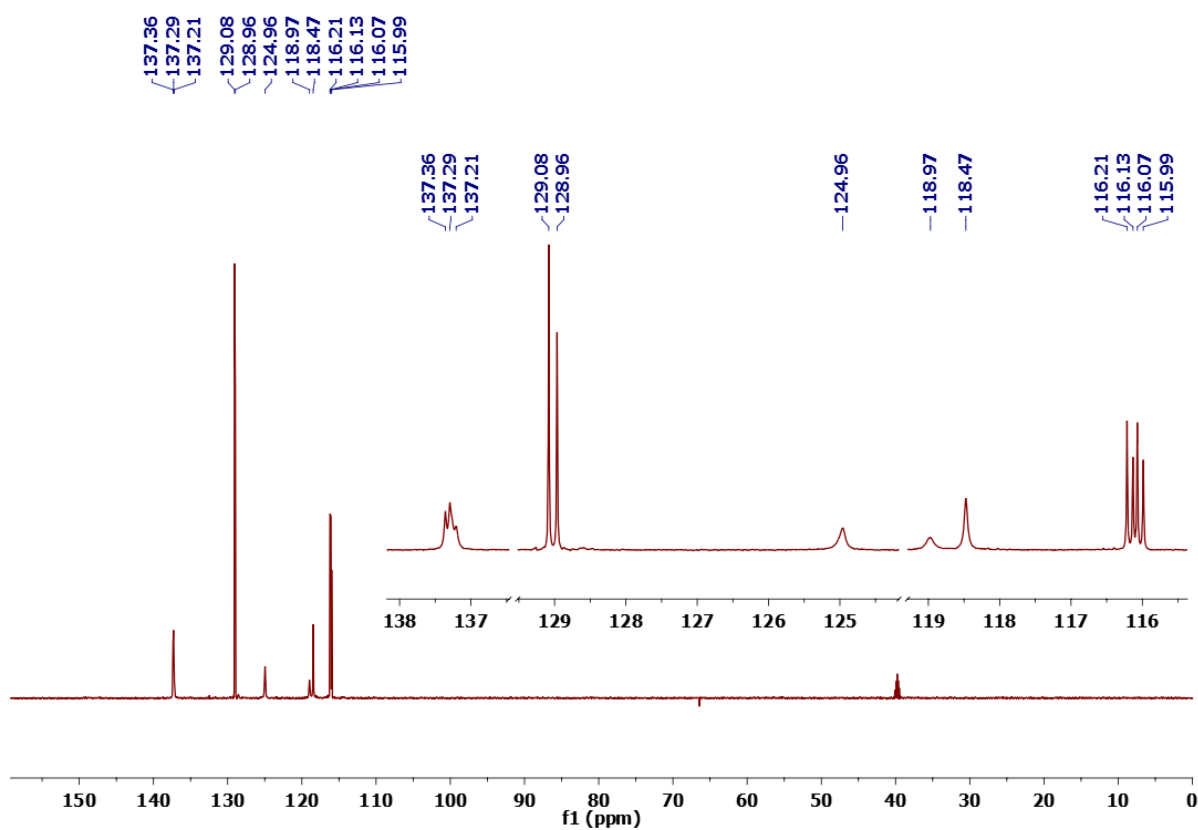

**<sup>19</sup>F NMR spectrum of (E)/(Z)-4-(4-fluorobenzylidene)-1-phenylpyrazolidine-3,5-dione (3e)**

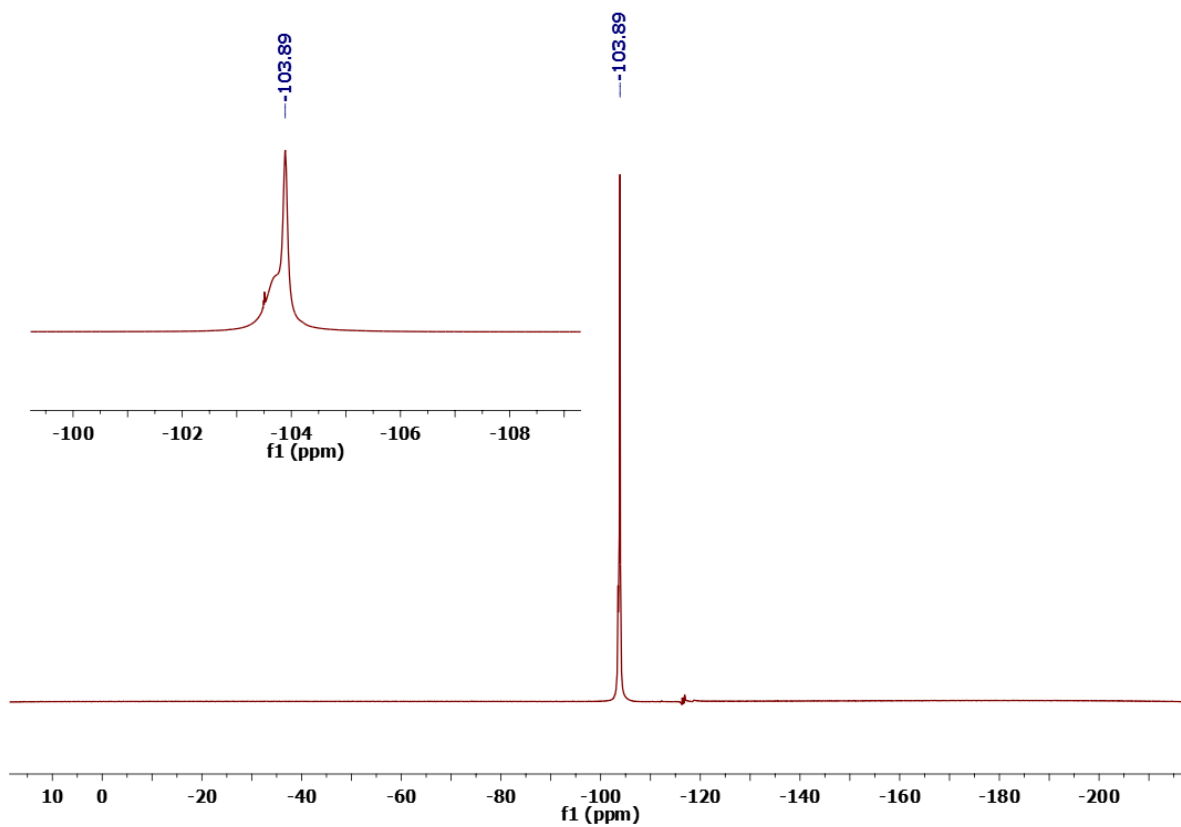

<sup>1</sup>H NMR spectrum of (E)/(Z)-4-(4-cyanobenzylidene)-1-phenylpyrazolidine-3,5-dione (3f)

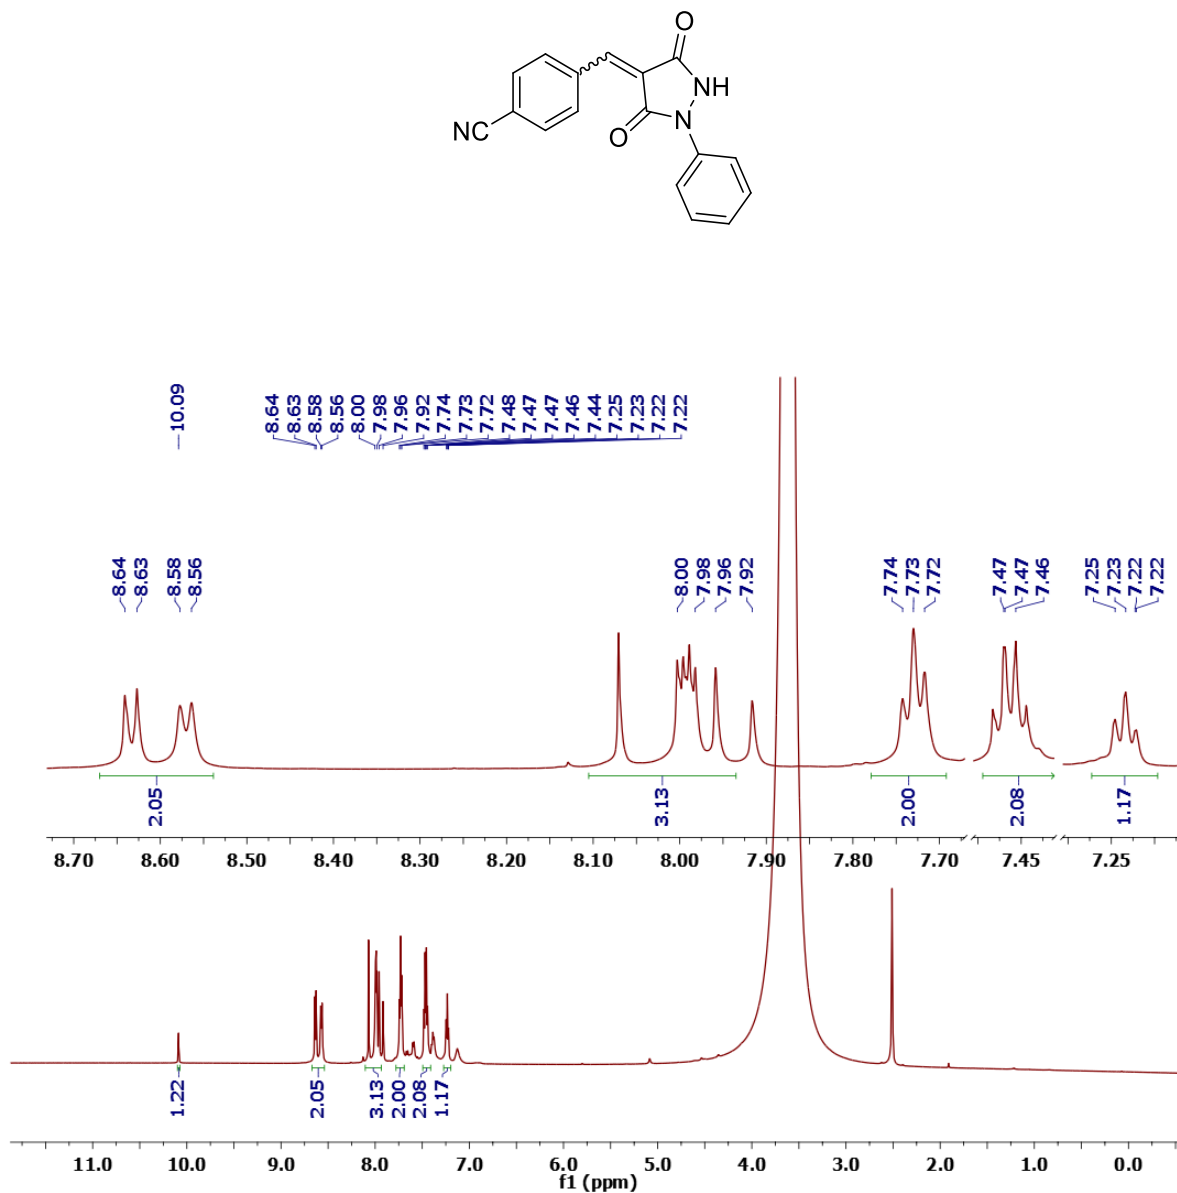

**<sup>13</sup>C NMR spectrum of (E)/(Z)-4-(4-cyanobenzylidene)-1-phenylpyrazolidine-3,5-dione (3f)**

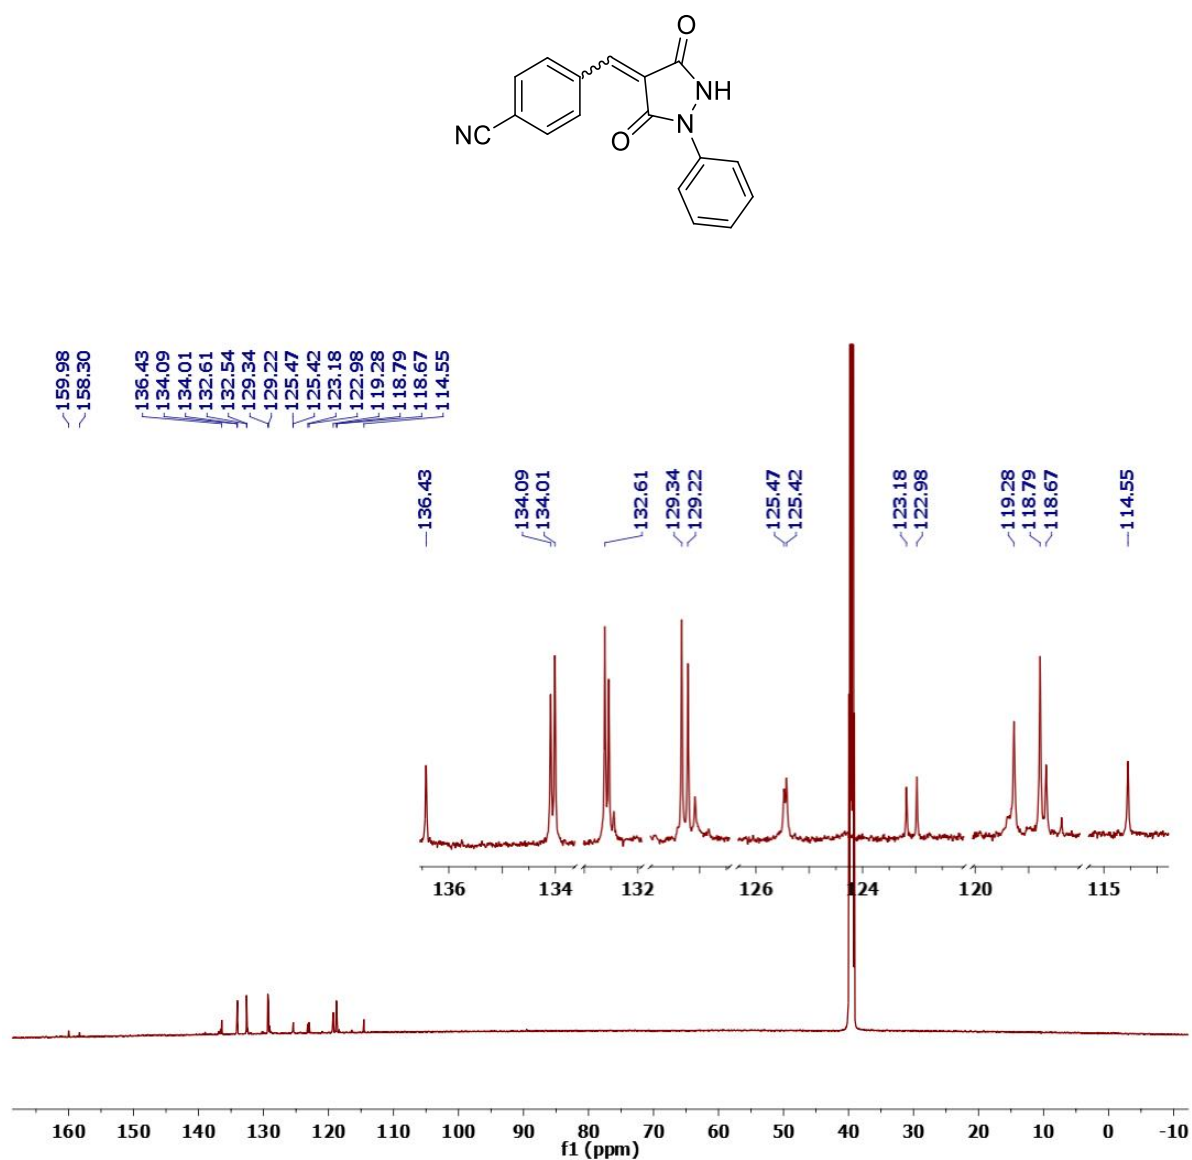

**<sup>13</sup>C DEPT-135 NMR spectrum of (E)/(Z)-4-(4-cyanobenzylidene)-1-phenylpyrazolidine-3,5-dione (3f)**

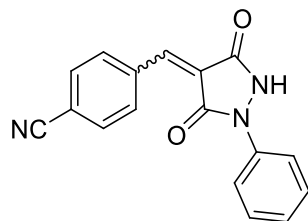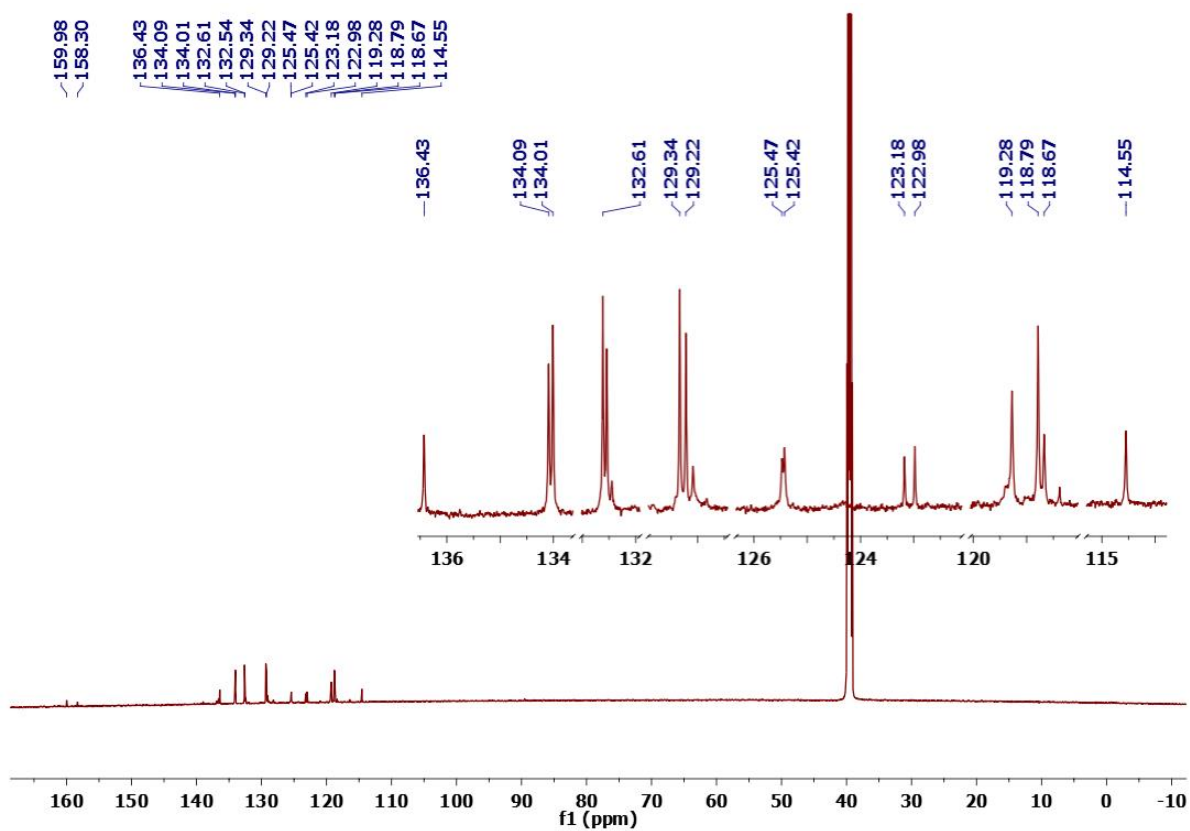

**<sup>1</sup>H NMR spectrum of (E)/(Z)-4-(4-nitrobenzylidene)-1-phenylpyrazolidine-3,5-dione (3g)**

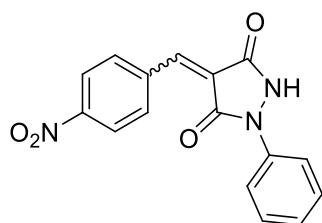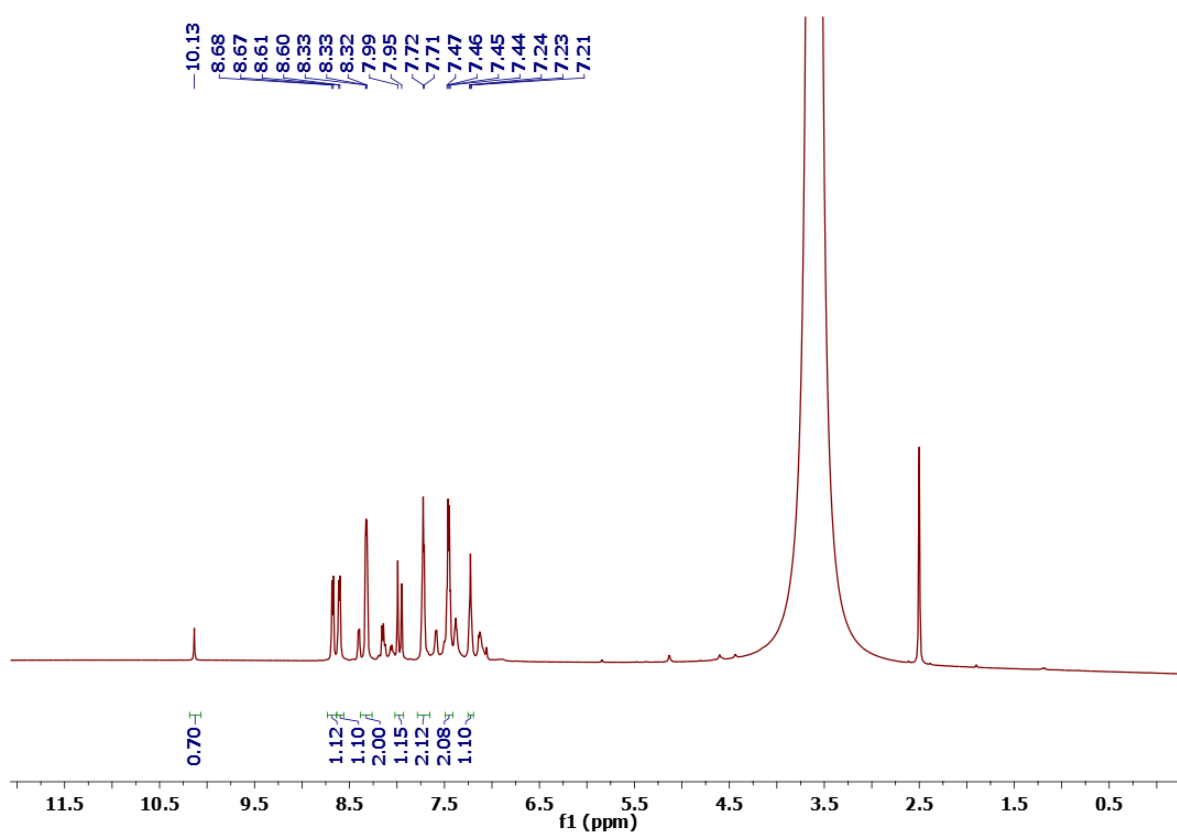

<sup>13</sup>C NMR spectrum of (E)/(Z)-4-(4-nitrobenzylidene)-1-phenylpyrazolidine-3,5-dione (3g)

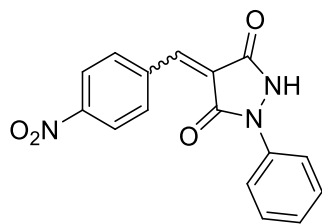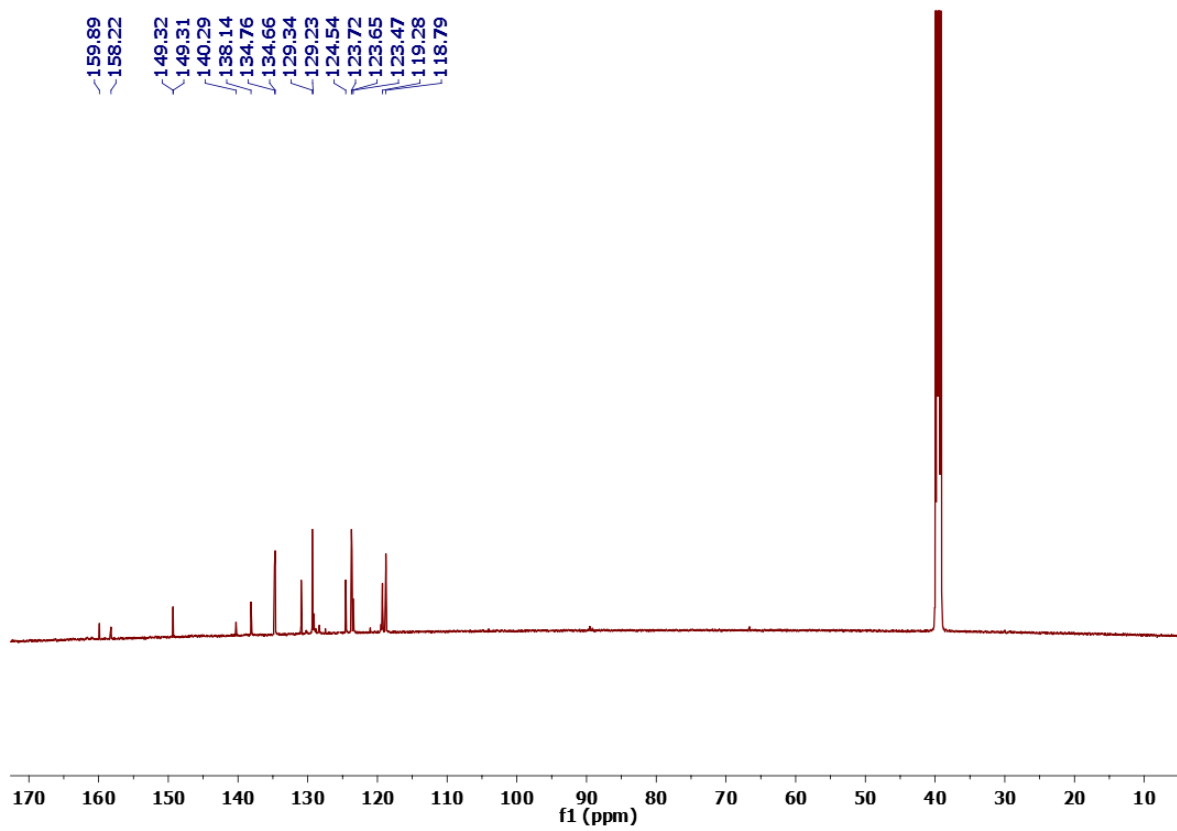

<sup>13</sup>C DEPT-135 NMR spectrum of (E)/(Z)-4-(4-nitrobenzylidene)-1-phenylpyrazolidine-3,5-dione (3g)

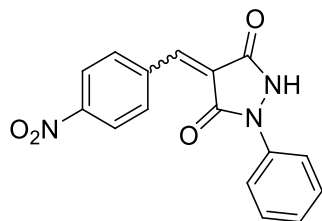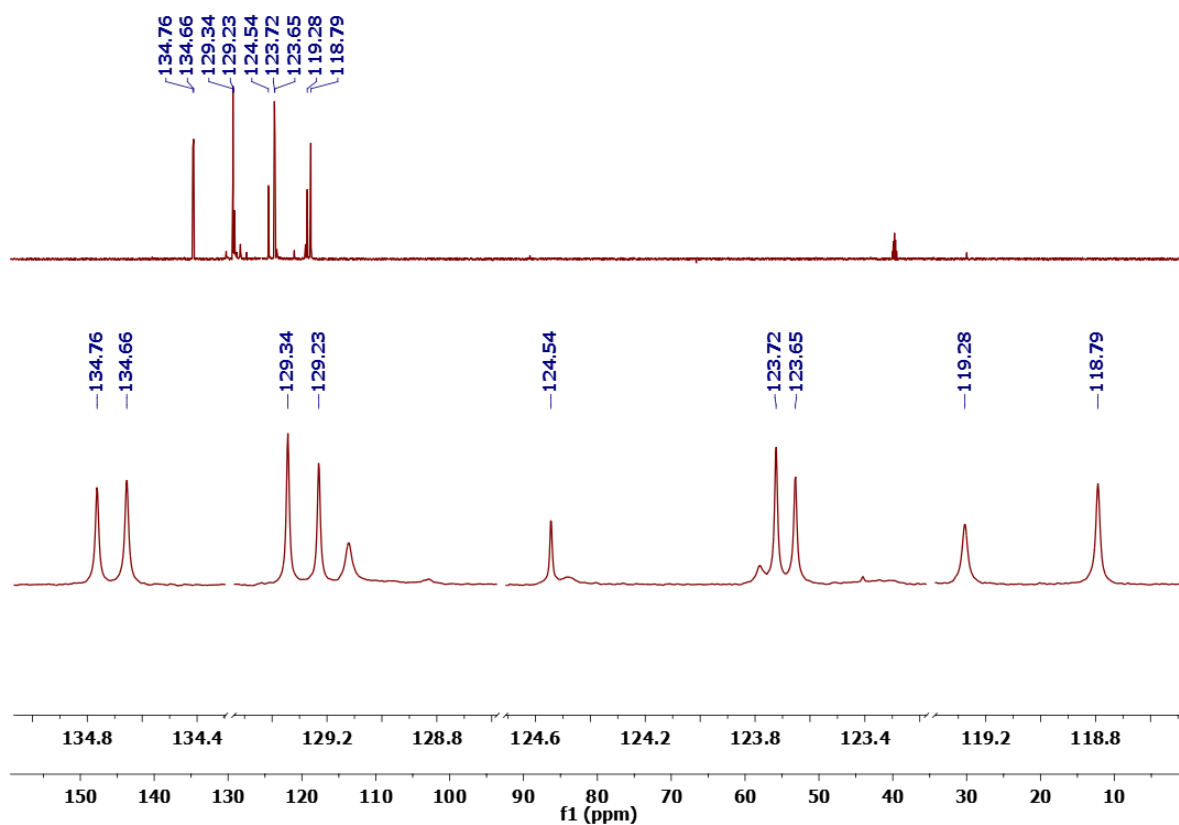

<sup>1</sup>H NMR spectrum of (4'R,5'R)-1'',4'-diphenyl-4'H-dispiro[fluorene-9,3'-pyrazole-5',4''-pyrazolidine]-3'',5''-dione (5a) and (4'S,5'R)-1'',4'-diphenyl-4'H-dispiro[fluorene-9,3'-pyrazole-5',4''-pyrazolidine]-3'',5''-dione (5'a)

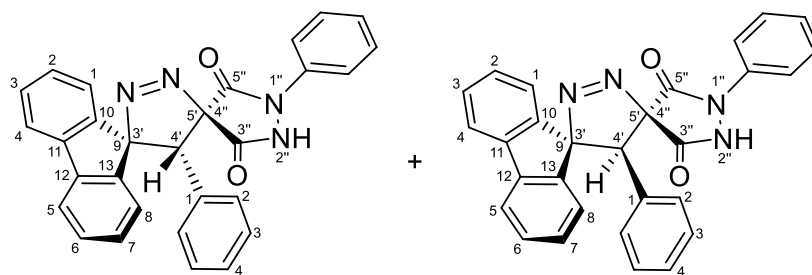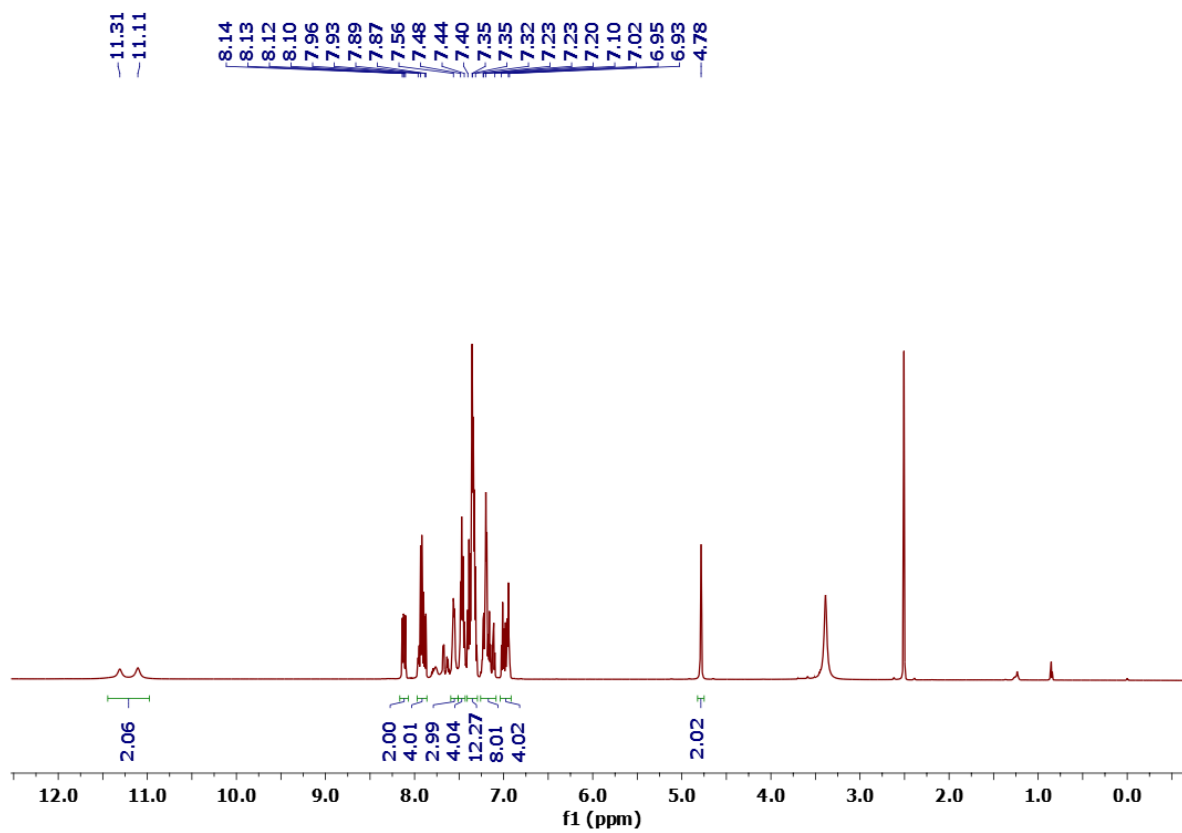

**$^{13}\text{C}$  NMR spectrum of (4'R,5'R)-1'',4'-diphenyl-4'H-dispiro[fluorene-9,3'-pyrazole-5',4''-pyrazolidine]-3'',5''-dione (5a) and (4'S,5'R)-1'',4'-diphenyl-4'H-dispiro[fluorene-9,3'-pyrazole-5',4''-pyrazolidine]-3'',5''-dione (5'a)**

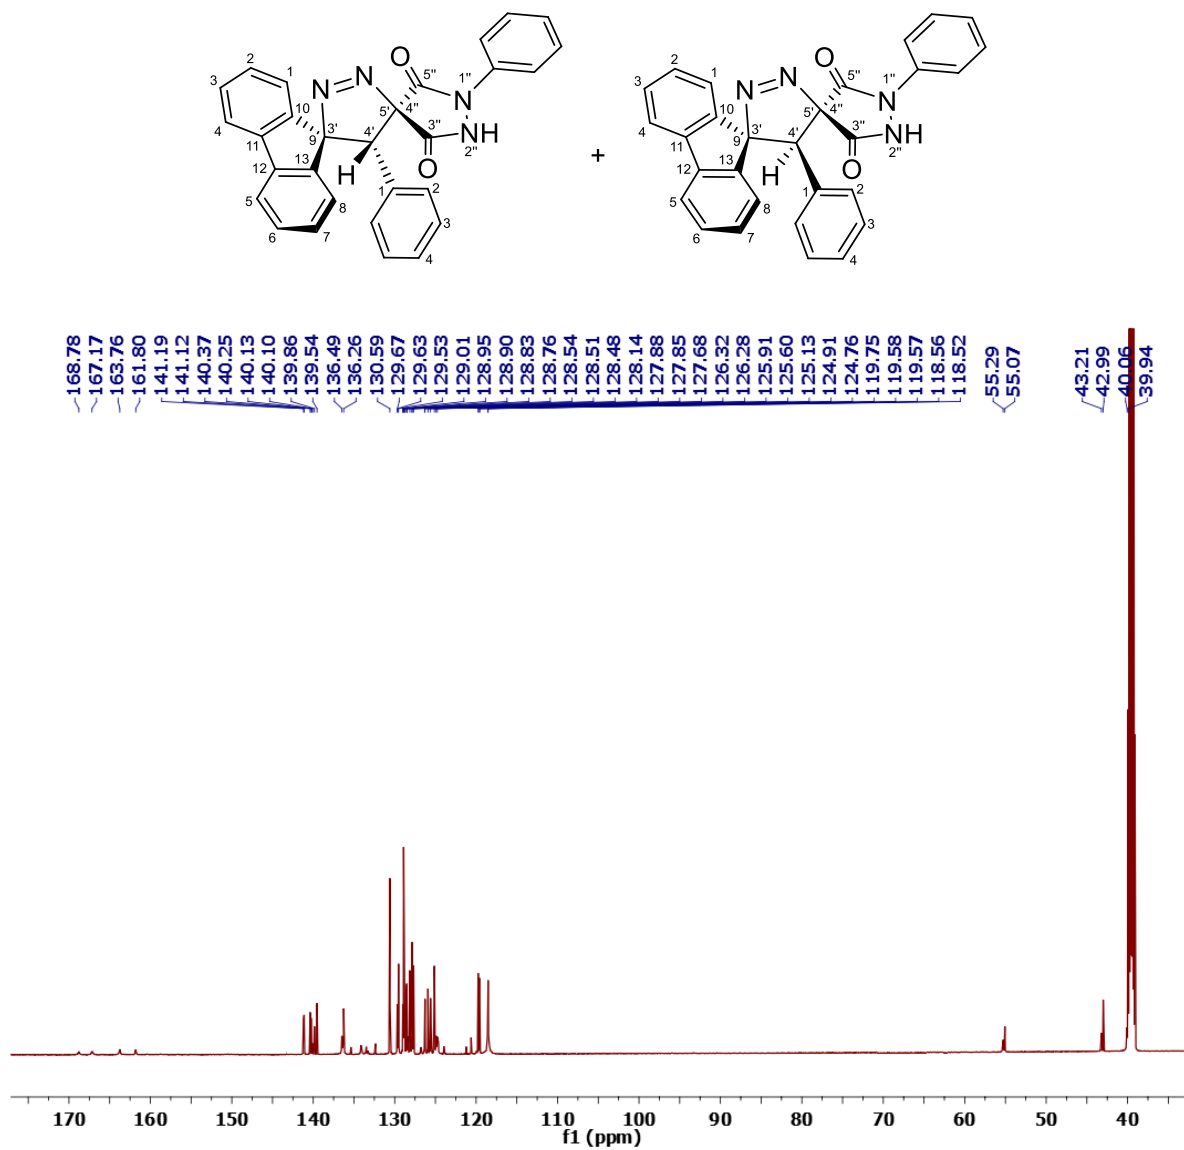

$^{13}\text{C}$  DEPT-135 NMR spectrum of (4'R,5'R)-1'',4'-diphenyl-4'H-dispiro[fluorene-9,3'-pyrazole-5',4''-pyrazolidine]-3'',5''-dione (5a) and (4'S,5'R)-1'',4'-diphenyl-4'H-dispiro[fluorene-9,3'-pyrazole-5',4''-pyrazolidine]-3'',5''-dione (5'a)

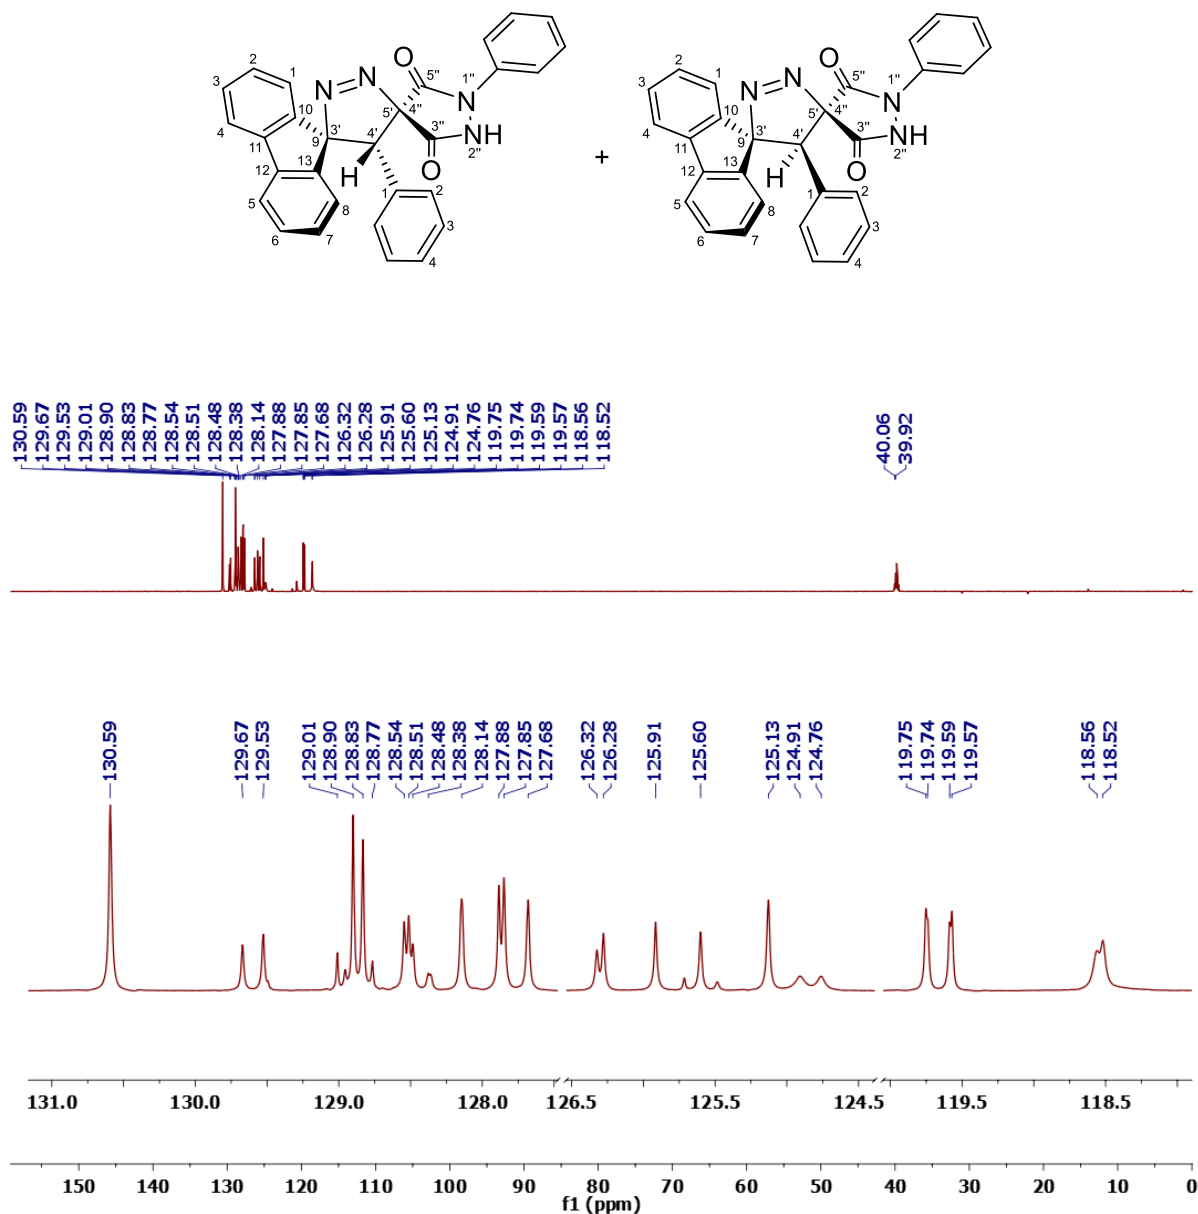

**$^1\text{H}$ - $^1\text{H}$  gDQCOSY NMR spectrum of (4'R,5'R)-1'',4'-diphenyl-4'H-dispiro[fluorene-9,3'-pyrazole-5',4''-pyrazolidine]-3'',5''-dione (5a) and (4'S,5'R)-1'',4'-diphenyl-4'H-dispiro[fluorene-9,3'-pyrazole-5',4''-pyrazolidine]-3'',5''-dione (5'a)**

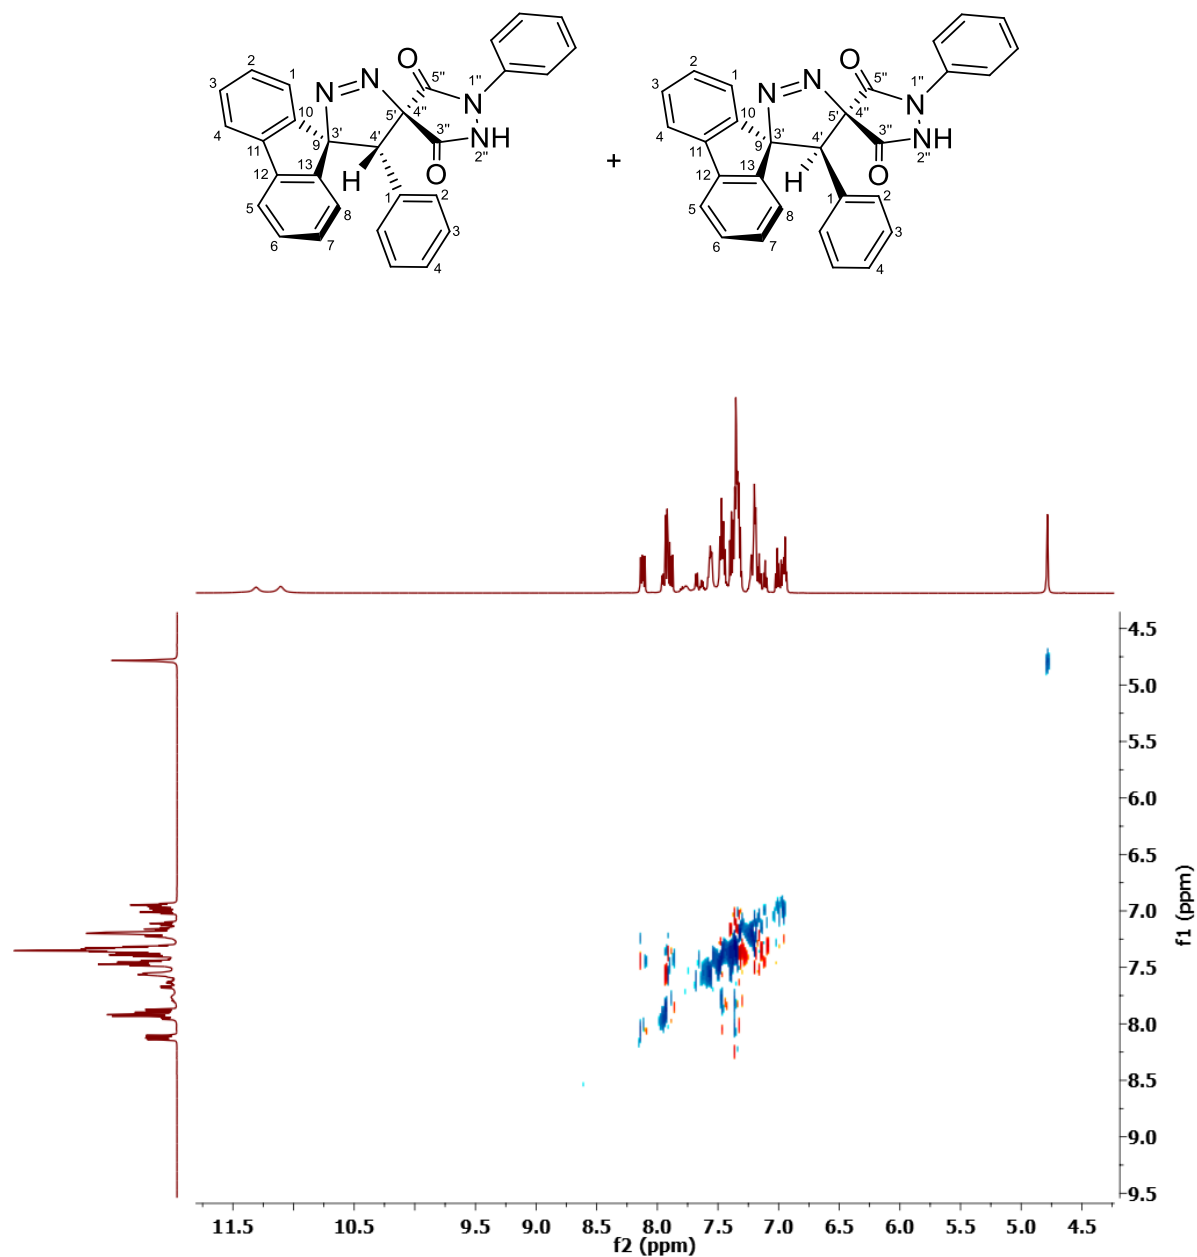

$^1\text{H}$ - $^{13}\text{C}$ -HSQC NMR spectrum of (4'R,5'R)-1'',4'-diphenyl-4'H-dispiro[fluorene-9,3'-pyrazole-5',4''-pyrazolidine]-3'',5''-dione (5a) and (4'S,5'R)-1'',4'-diphenyl-4'H-dispiro[fluorene-9,3'-pyrazole-5',4''-pyrazolidine]-3'',5''-dione (5'a)

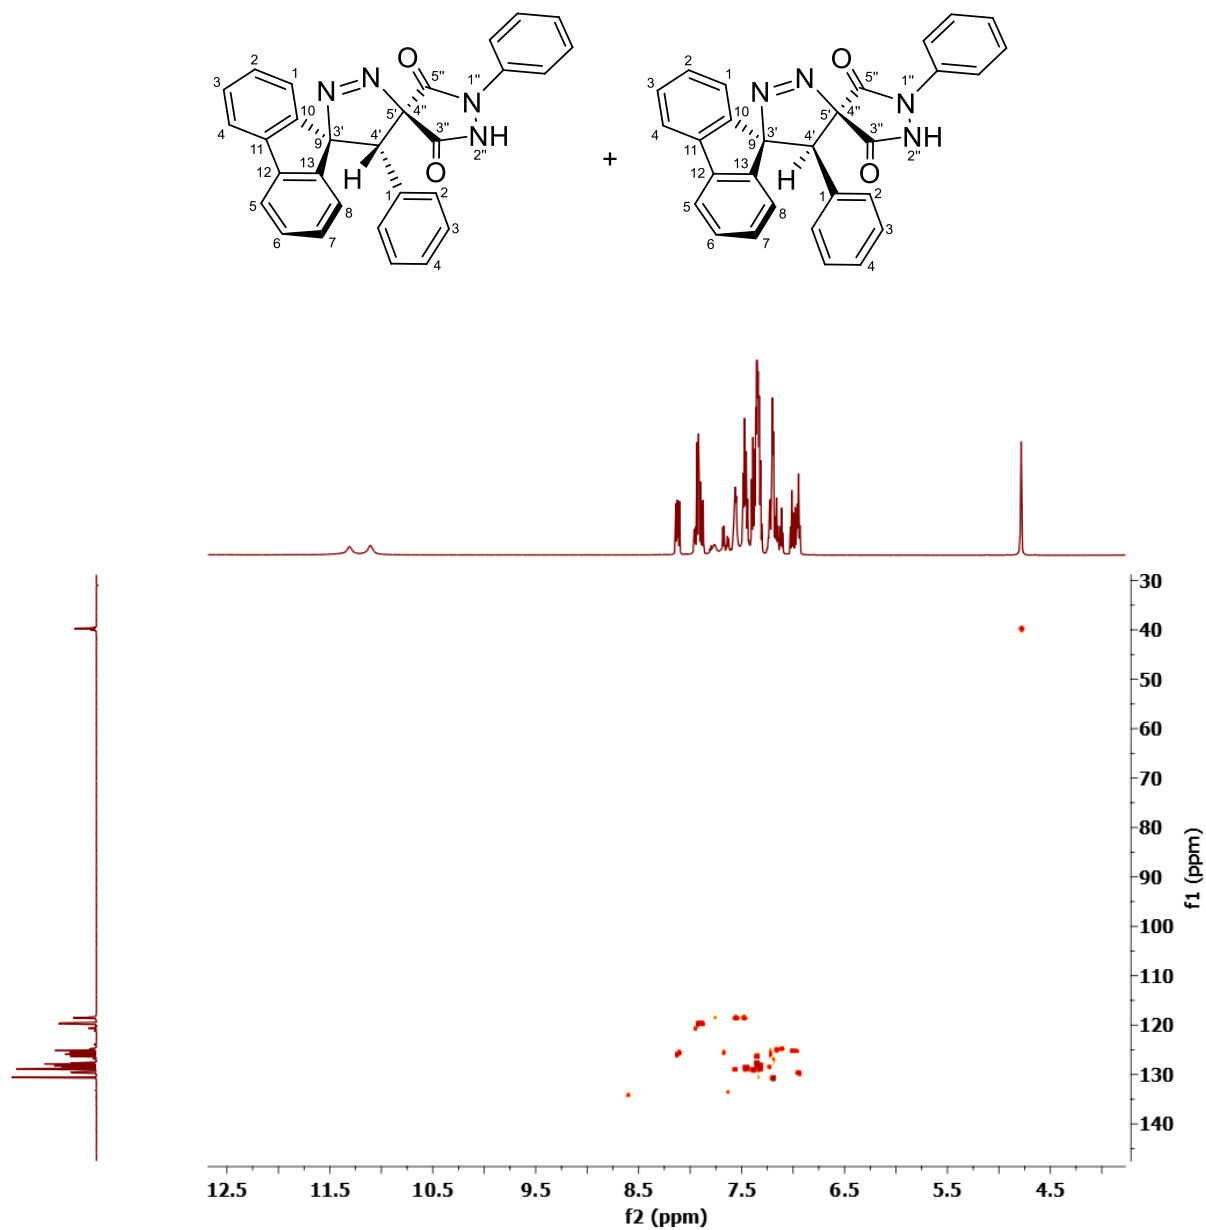

$^1\text{H}$ - $^{13}\text{C}$ -gHMBC NMR spectrum of (4'R,5'R)-1'',4'-diphenyl-4'H-dispiro[fluorene-9,3'-pyrazole-5',4''-pyrazolidine]-3'',5''-dione (5a) and (4'S,5'R)-1'',4'-diphenyl-4'H-dispiro[fluorene-9,3'-pyrazole-5',4''-pyrazolidine]-3'',5''-dione (5'a)

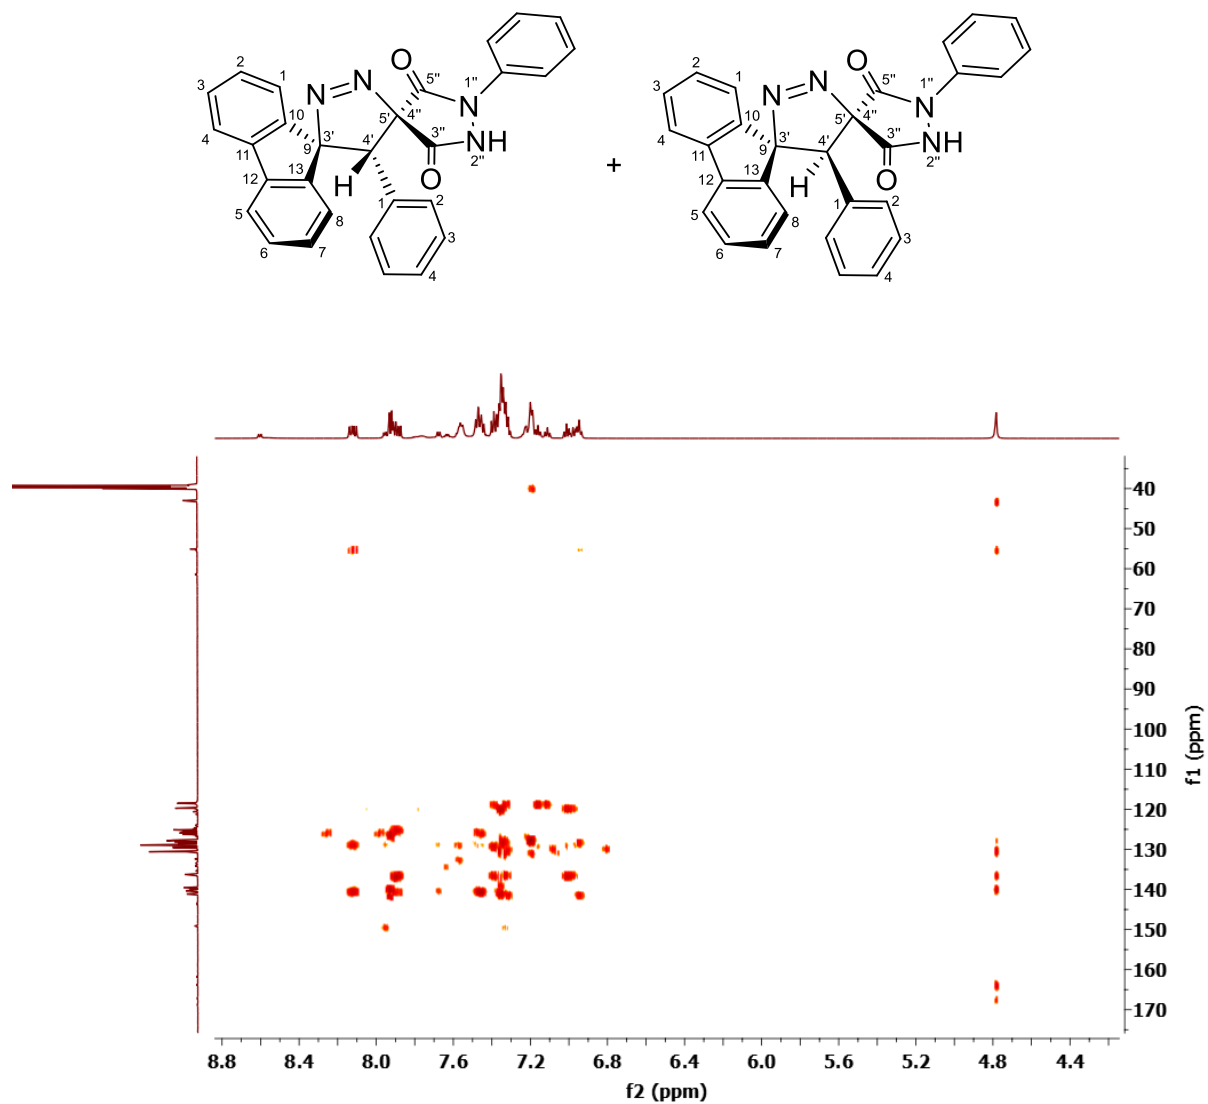

**<sup>1</sup>H NMR spectrum of (4'R,5'R)-1''-phenyl-4'-(4-methoxyphenyl)-4'H-dispiro[fluorene-9,3'-pyrazole-5',4''-pyrazolidine]-3'',5''-dione (5b) and (4'S,5'R)-1''-phenyl-4'-(4-methoxyphenyl)-4'H-dispiro[fluorene-9,3'-pyrazole-5',4''-pyrazolidine]-3'',5''-dione (5'b)**

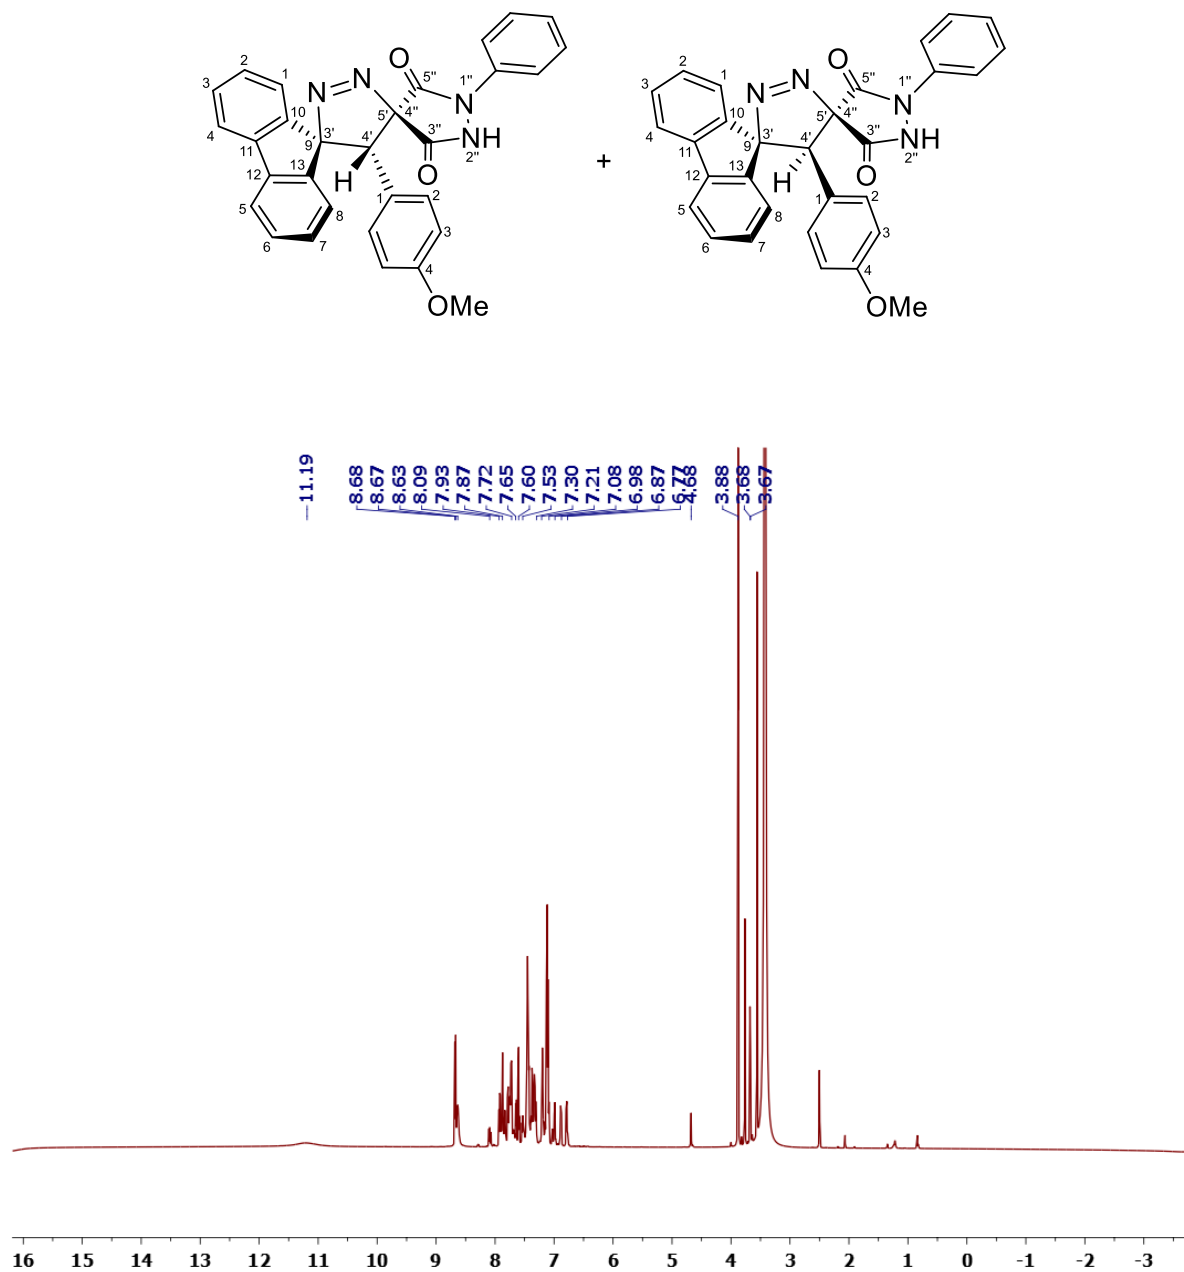

$^{13}\text{C}$  NMR spectrum of (4'R,5'R)-1''-phenyl-4'-(4-methoxyphenyl)-4'H-dispiro[fluorene-9,3'-pyrazole-5',4''-pyrazolidine]-3'',5''-dione (5b) and (4'S,5'R)-1''-phenyl-4'-(4-methoxyphenyl)-4'H-dispiro[fluorene-9,3'-pyrazole-5',4''-pyrazolidine]-3'',5''-dione (5'b)

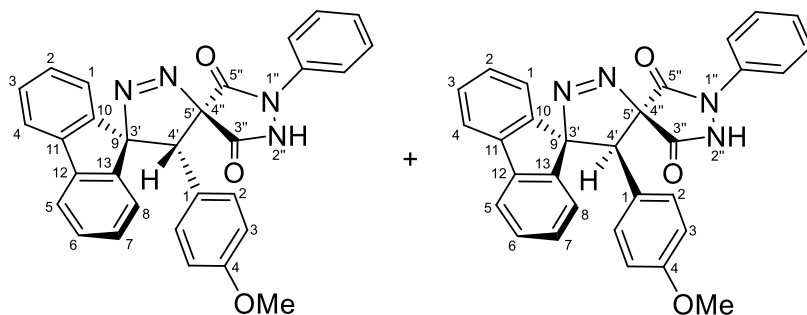

DFCA-4-rep

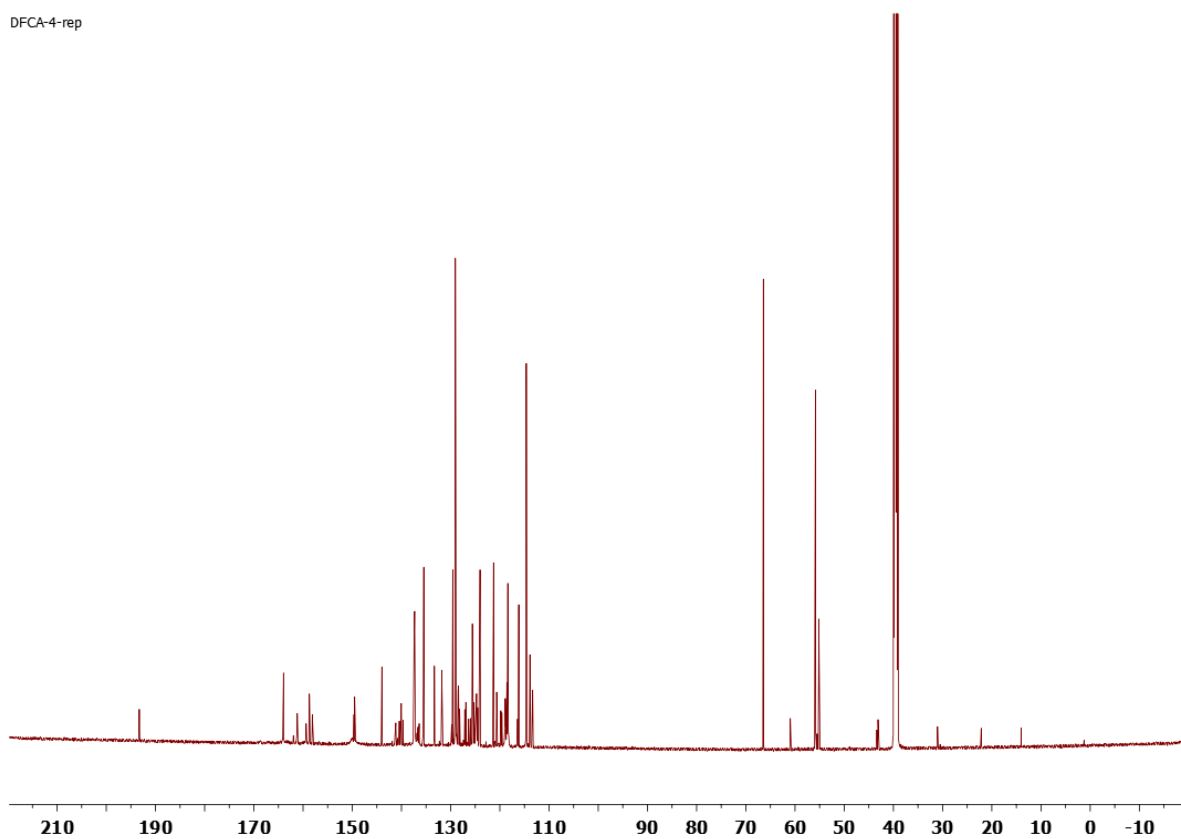

$^1\text{H}$  NMR spectrum of (4'R,5'R)-1''-phenyl-4'-(p-tolyl)-4'H-dispiro[fluorene-9,3'-pyrazole-5',4''-pyrazolidine]-3'',5''-dione (5c) and (4'S,5'R)-1''-phenyl-4'-(p-tolyl)-4'H-dispiro[fluorene-9,3'-pyrazole-5',4''-pyrazolidine]-3'',5''-dione (5'c)

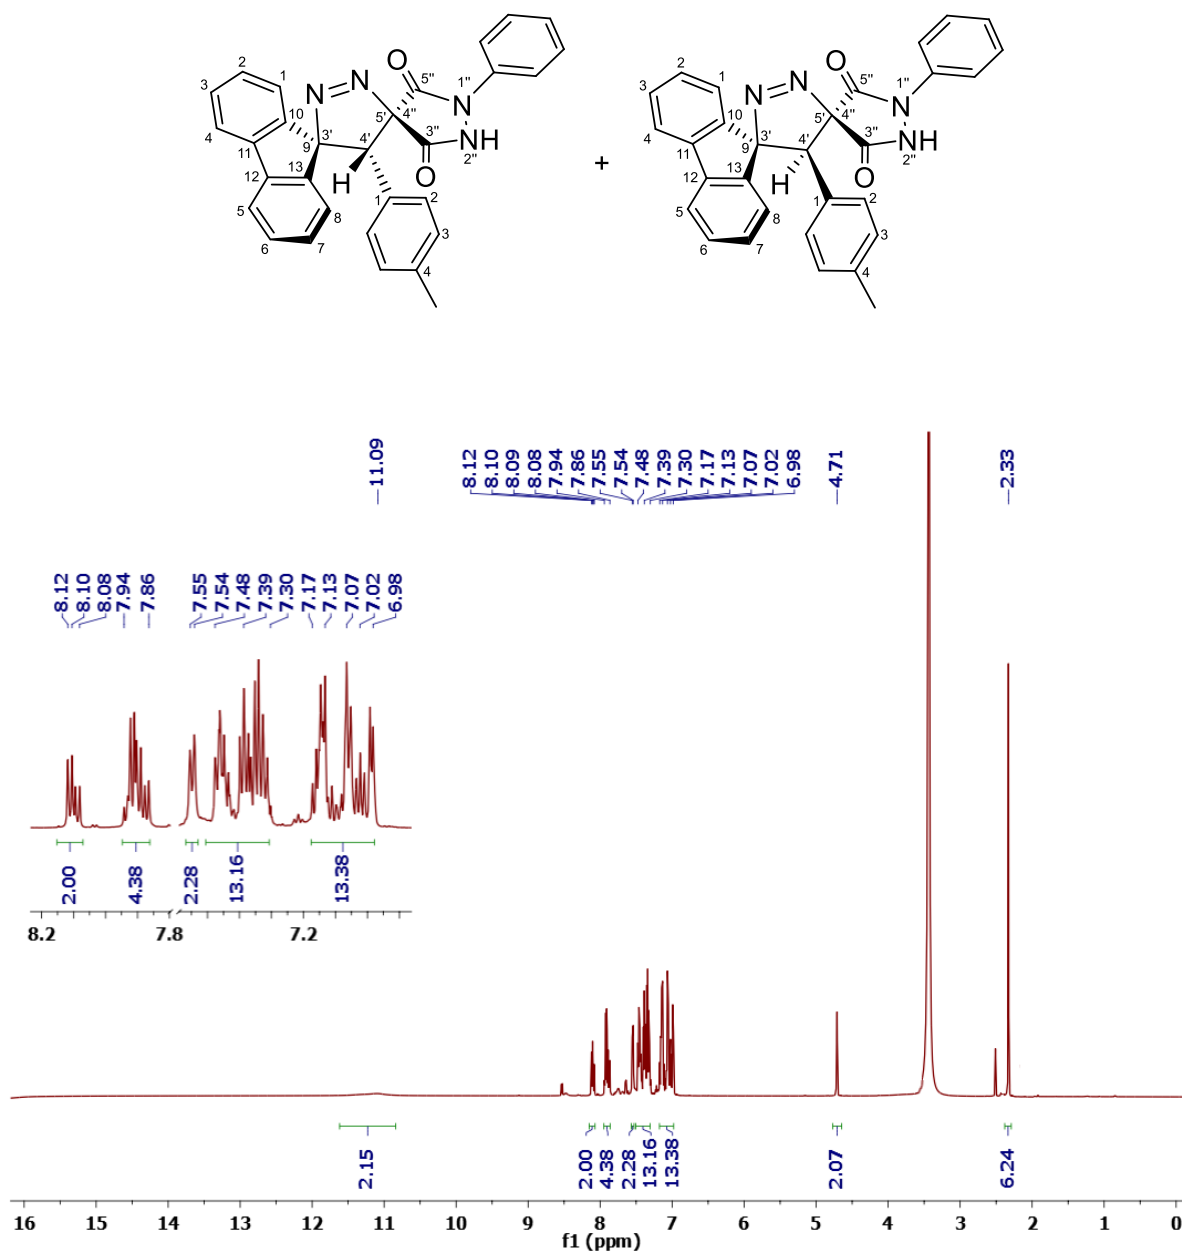

$^{13}\text{C}$  NMR spectrum of (4'R,5'R)-1''-phenyl-4'-(p-tolyl)-4'H-dispiro[fluorene-9,3'-pyrazole-5',4''-pyrazolidine]-3'',5''-dione (5c) and (4'S,5'R)-1''-phenyl-4'-(p-tolyl)-4'H-dispiro[fluorene-9,3'-pyrazole-5',4''-pyrazolidine]-3'',5''-dione (5'c)

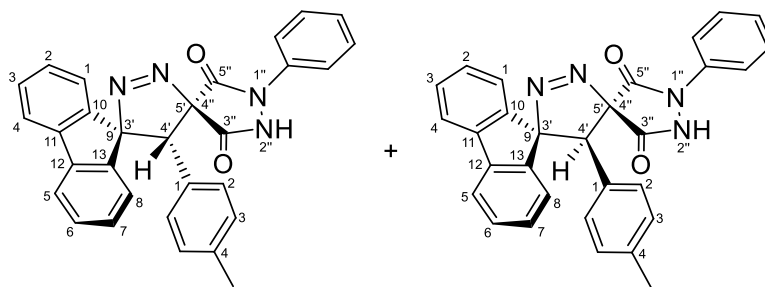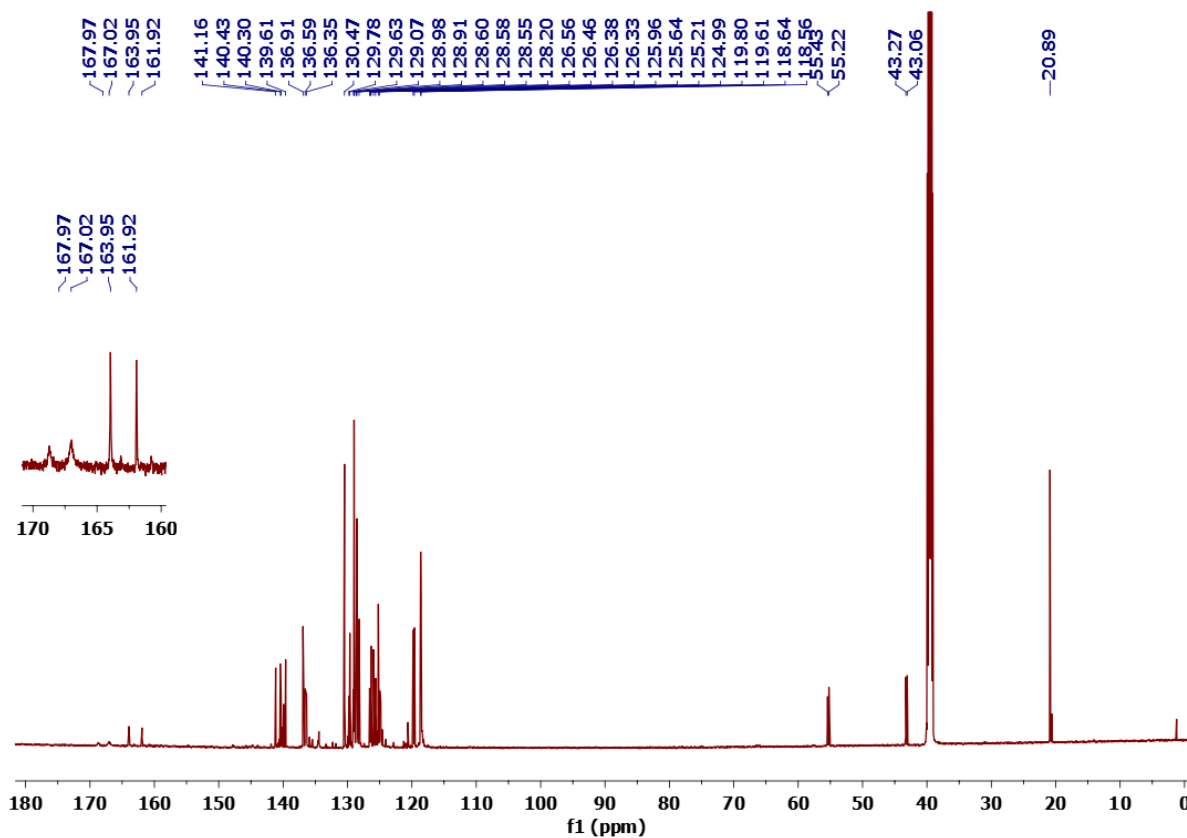

**$^{13}\text{C}$  DEPT-135 NMR spectrum of (4'R,5'R)-1''-phenyl-4'-(p-tolyl)-4'H-dispiro[fluorene-9,3'-pyrazole-5',4''-pyrazolidine]-3'',5''-dione (5c) and (4'S,5'R)-1''-phenyl-4'-(p-tolyl)-4'H-dispiro[fluorene-9,3'-pyrazole-5',4''-pyrazolidine]-3'',5''-dione (5'c)**

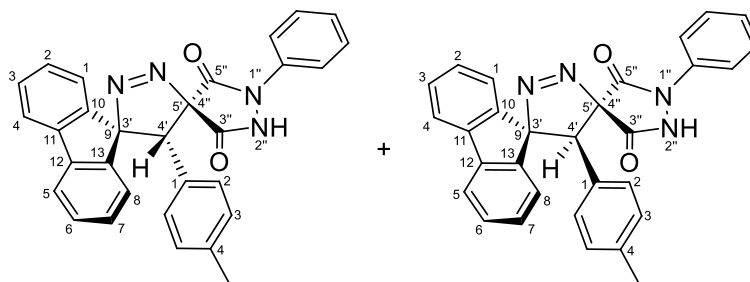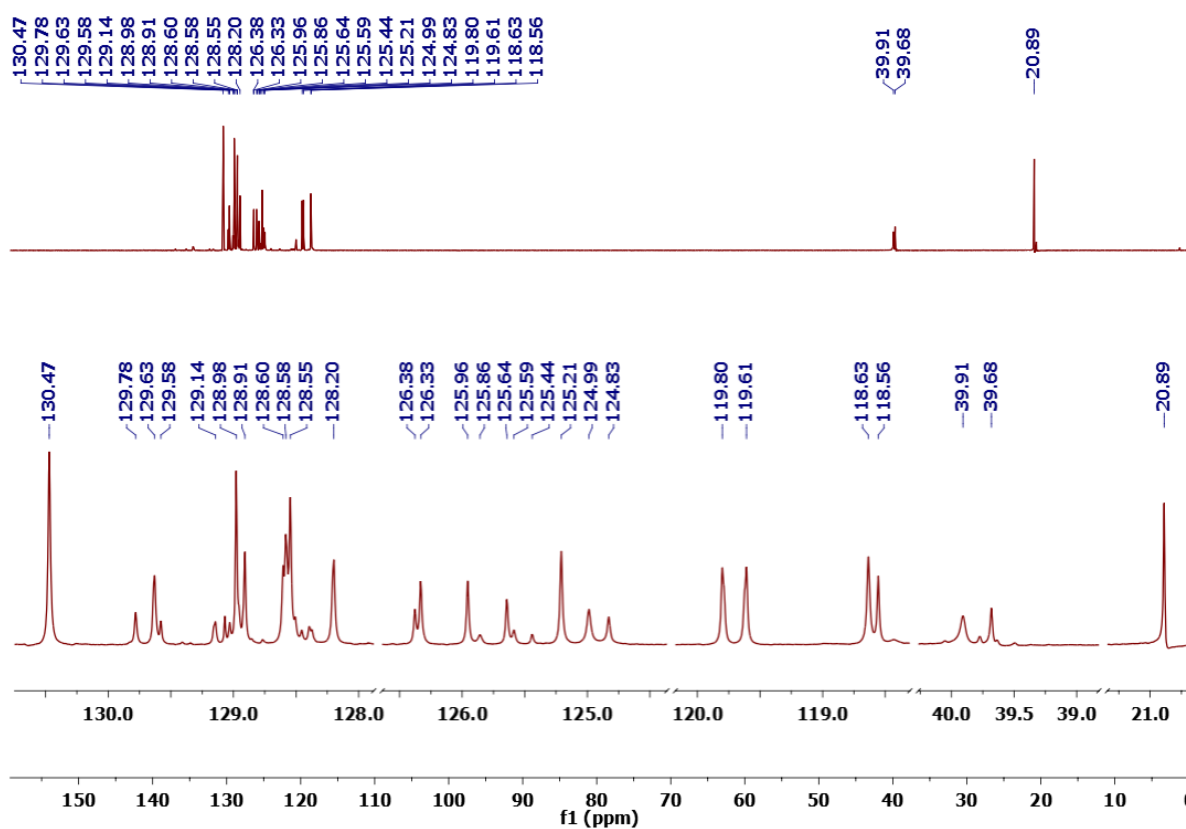

$^1\text{H}$ - $^1\text{H}$  gDQCOSY NMR spectrum of (4'R,5'R)-1''-phenyl-4'-(p-tolyl)-4'H-dispiro[fluorene-9,3'-pyrazole-5',4''-pyrazolidine]-3'',5''-dione (5c) and (4'S,5'R)-1''-phenyl-4'-(p-tolyl)-4'H-dispiro[fluorene-9,3'-pyrazole-5',4''-pyrazolidine]-3'',5''-dione (5'c)

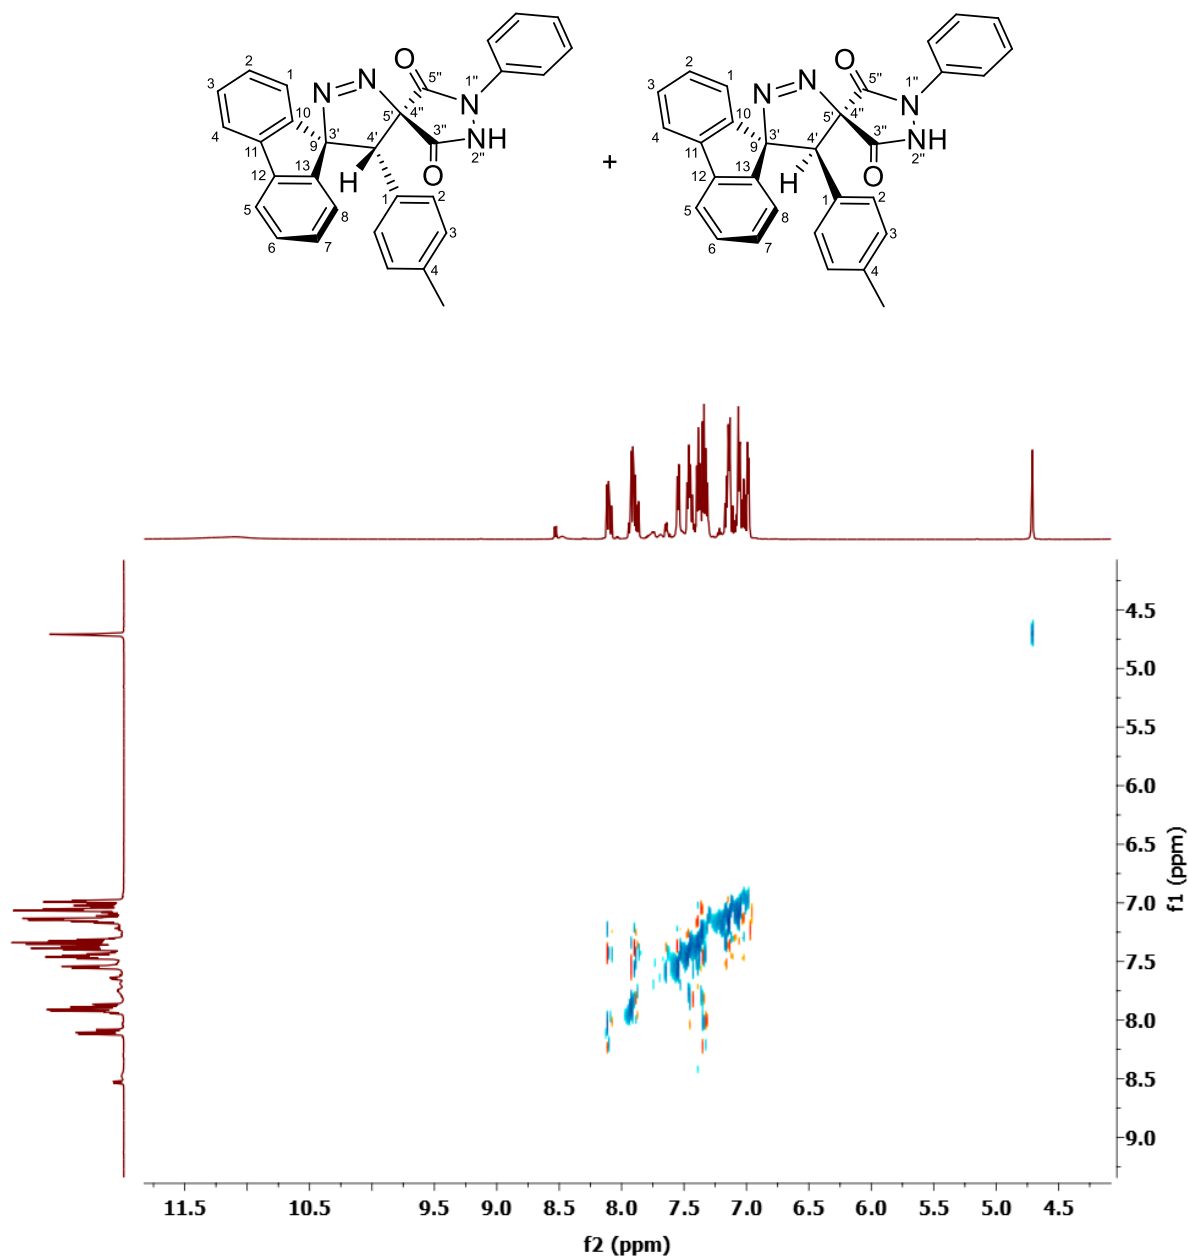

**$^1\text{H}$ - $^{13}\text{C}$ -HSQC NMR spectrum of (4'R,5'R)-1''-phenyl-4'-(p-tolyl)-4'H-dispiro[fluorene-9,3'-pyrazole-5',4''-pyrazolidine]-3'',5''-dione (5c) and (4'S,5'R)-1''-phenyl-4'-(p-tolyl)-4'H-dispiro[fluorene-9,3'-pyrazole-5',4''-pyrazolidine]-3'',5''-dione (5'c)**

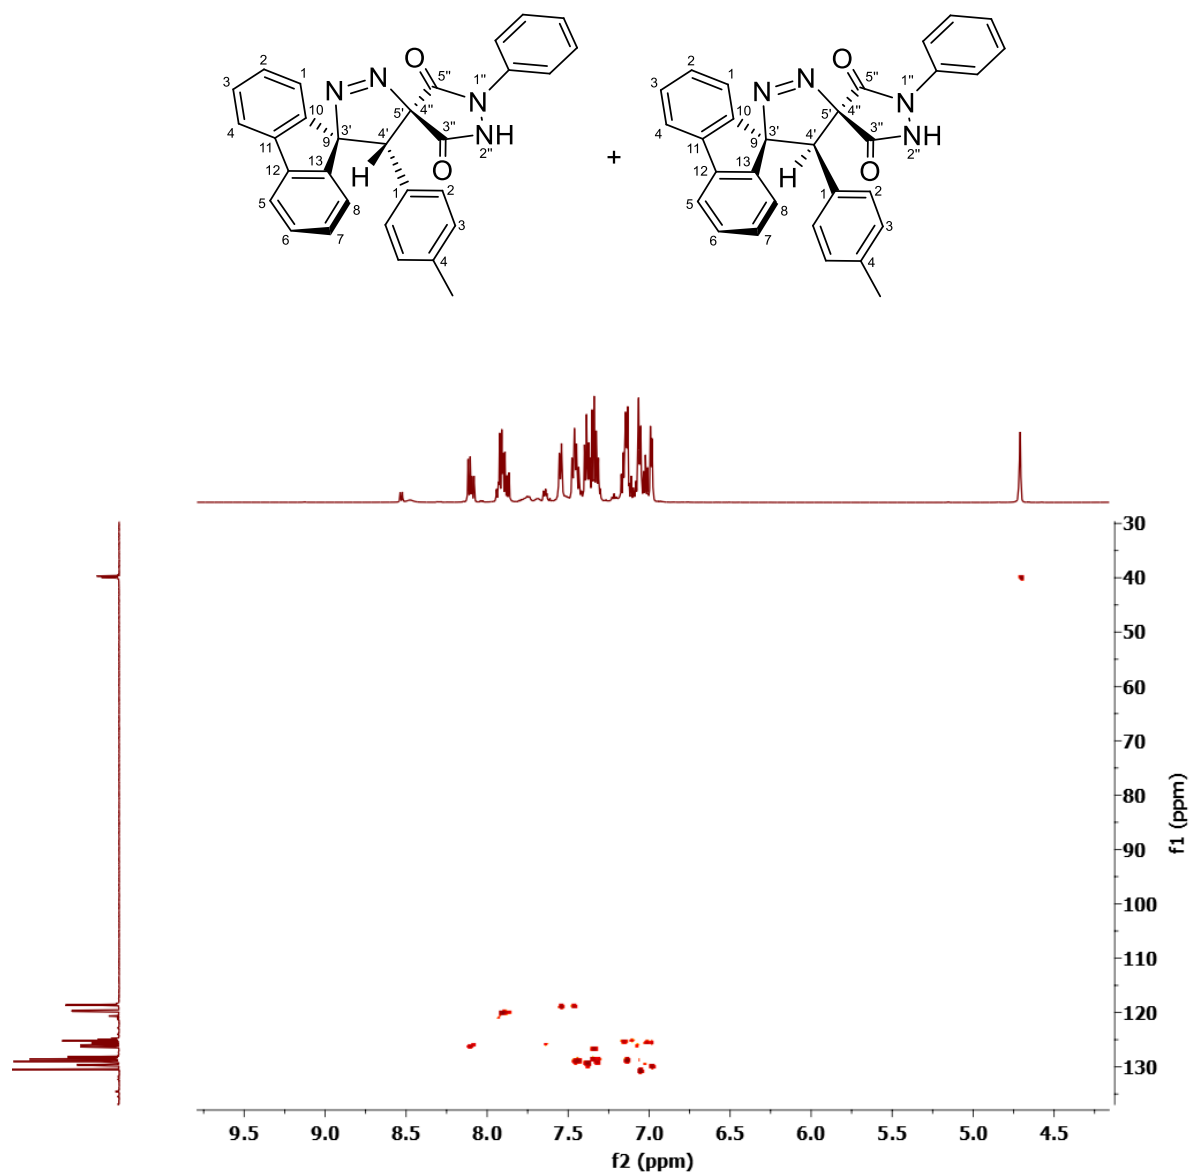

**$^1\text{H}$ - $^{13}\text{C}$ -gHMBC spectrum of (4'R,5'R)-1''-phenyl-4'-(p-tolyl)-4'H-dispiro[fluorene-9,3'-pyrazole-5',4''-pyrazolidine]-3'',5''-dione (5c) and (4'S,5'R)-1''-phenyl-4'-(p-tolyl)-4'H-dispiro[fluorene-9,3'-pyrazole-5',4''-pyrazolidine]-3'',5''-dione (5'c)**

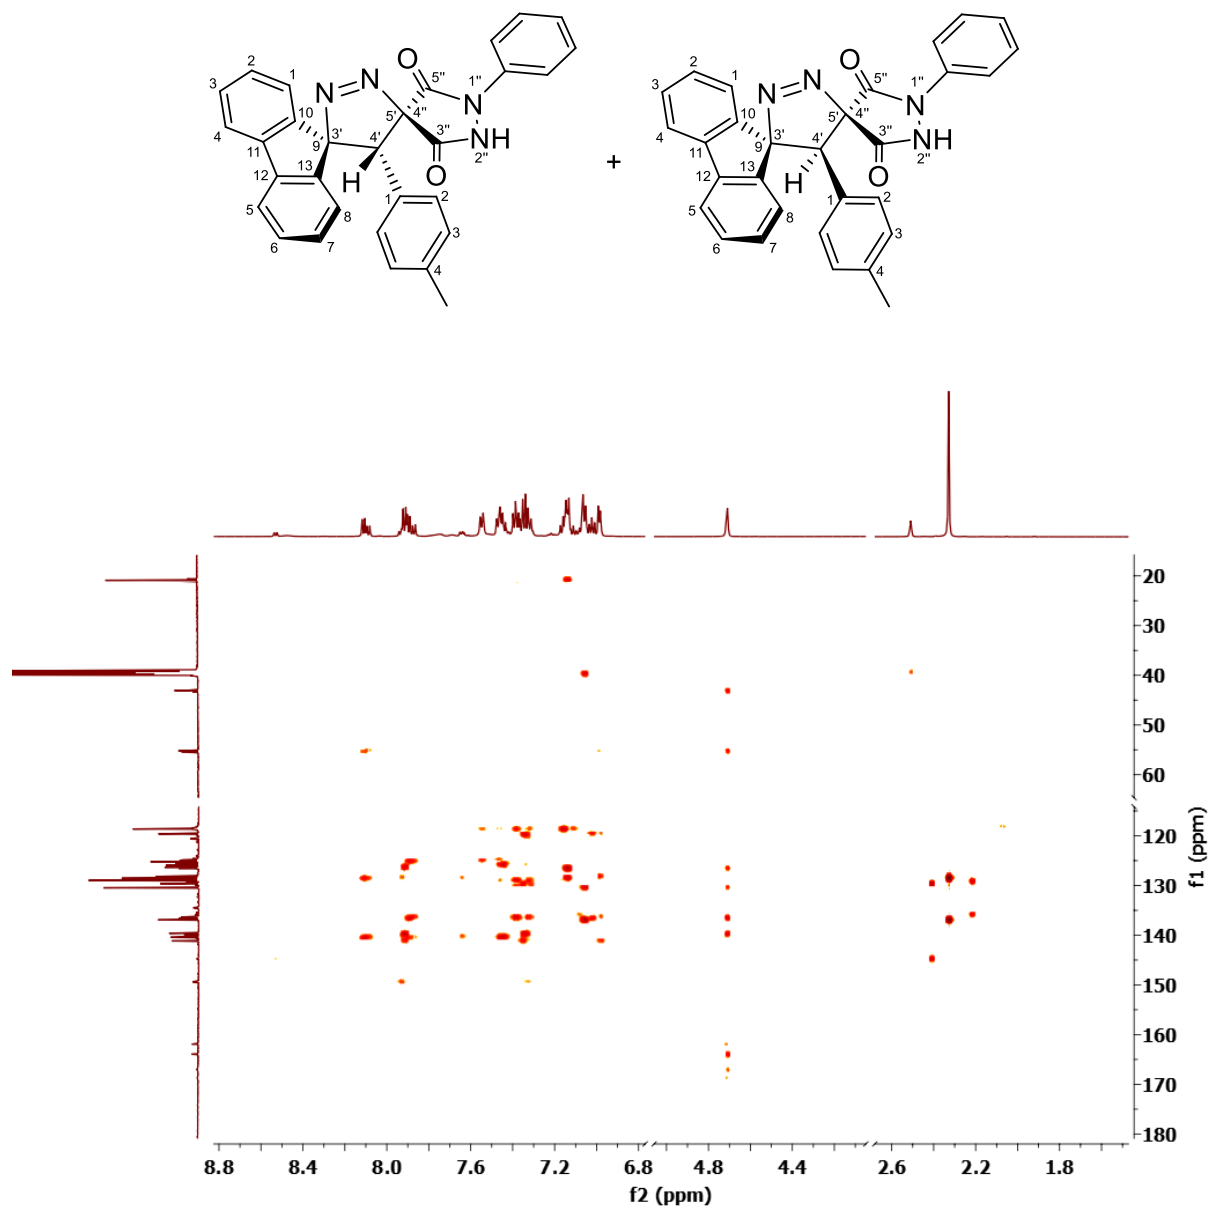

<sup>1</sup>H NMR spectrum of (4'R,5'R)-4'-(4-chlorophenyl)-1''-phenyl-4'H-dispiro[fluorene-9,3'-pyrazole-5',4''-pyrazolidine]-3'',5''-dione (5d) and (4'S,5'R)-4'-(4-chlorophenyl)-1''-phenyl-4'H-dispiro[fluorene-9,3'-pyrazole-5',4''-pyrazolidine]-3'',5''-dione (5'd)

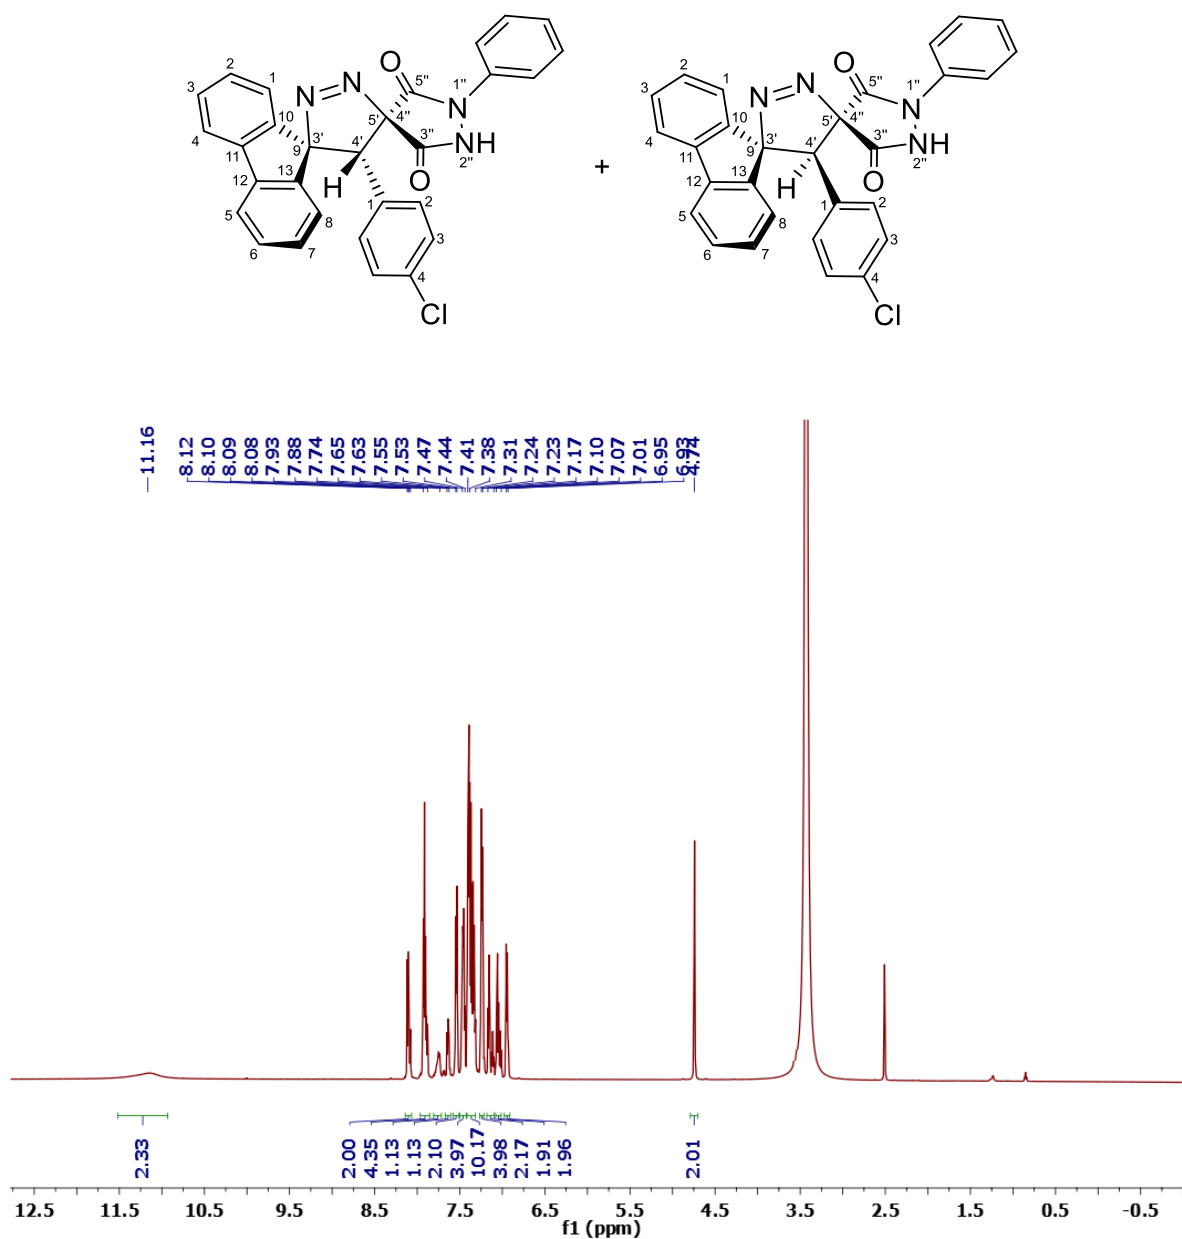

$^{13}\text{C}$  NMR spectrum of (4'R,5'R)-4'-(4-chlorophenyl)-1''-phenyl-4'H-dispiro[fluorene-9,3'-pyrazole-5',4''-pyrazolidine]-3'',5''-dione (5d) and (4'S,5'R)-4'-(4-chlorophenyl)-1''-phenyl-4'H-dispiro[fluorene-9,3'-pyrazole-5',4''-pyrazolidine]-3'',5''-dione (5'd)

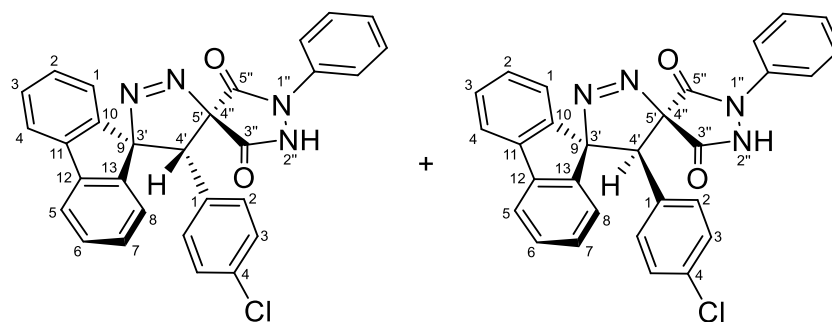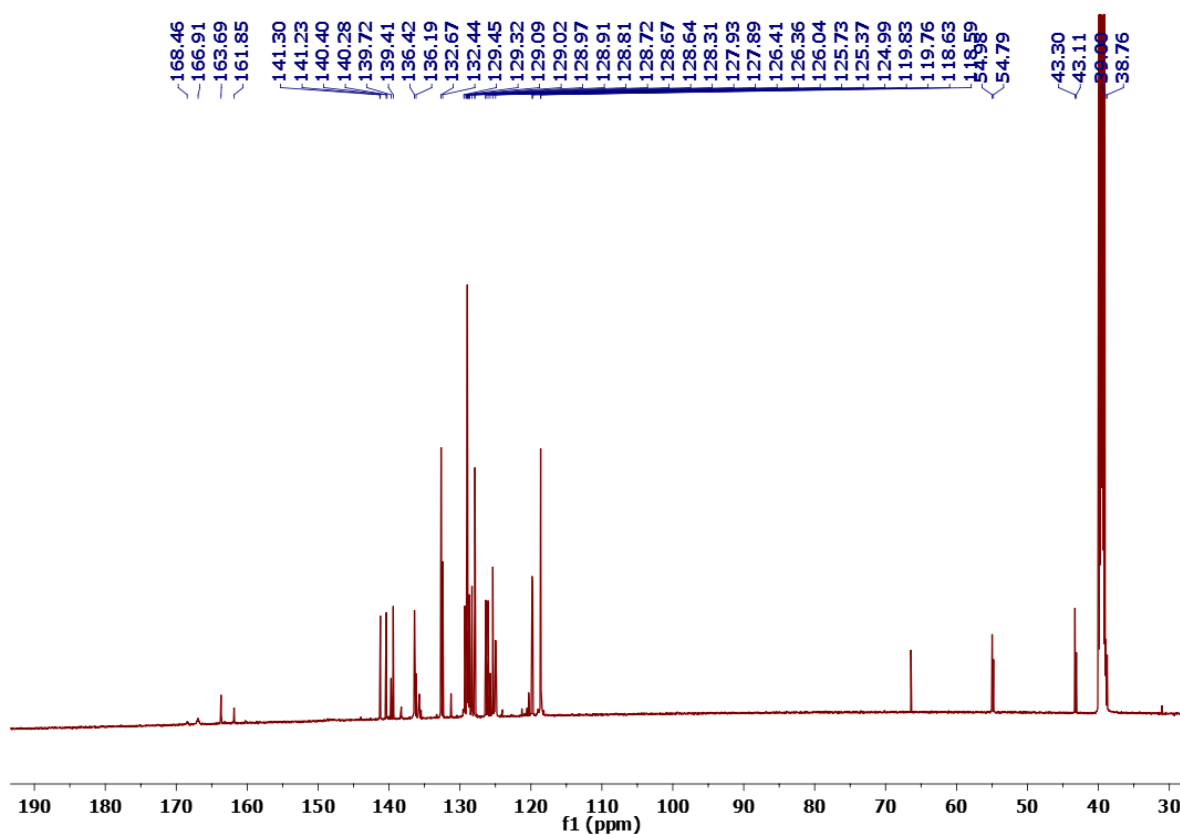

$^{13}\text{C}$  DEPT-135 NMR spectrum of (4'R,5'R)-4'-(4-chlorophenyl)-1''-phenyl-4'H-dispiro[fluorene-9,3'-pyrazole-5',4''-pyrazolidine]-3'',5''-dione (5d) and (4'S,5'S,R)-4'-(4-chlorophenyl)-1''-phenyl-4'H-dispiro[fluorene-9,3'-pyrazole-5',4''-pyrazolidine]-3'',5''-dione (5'd)

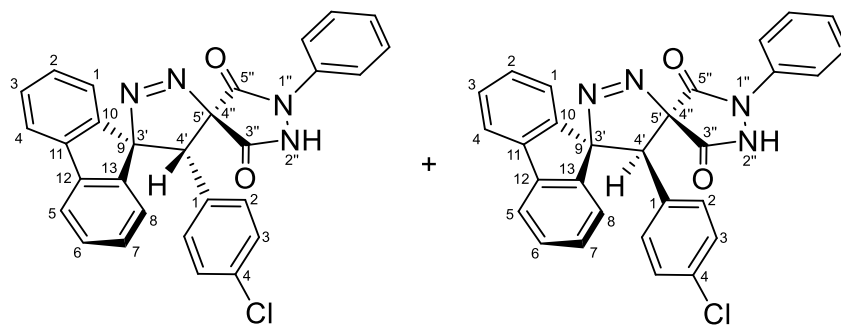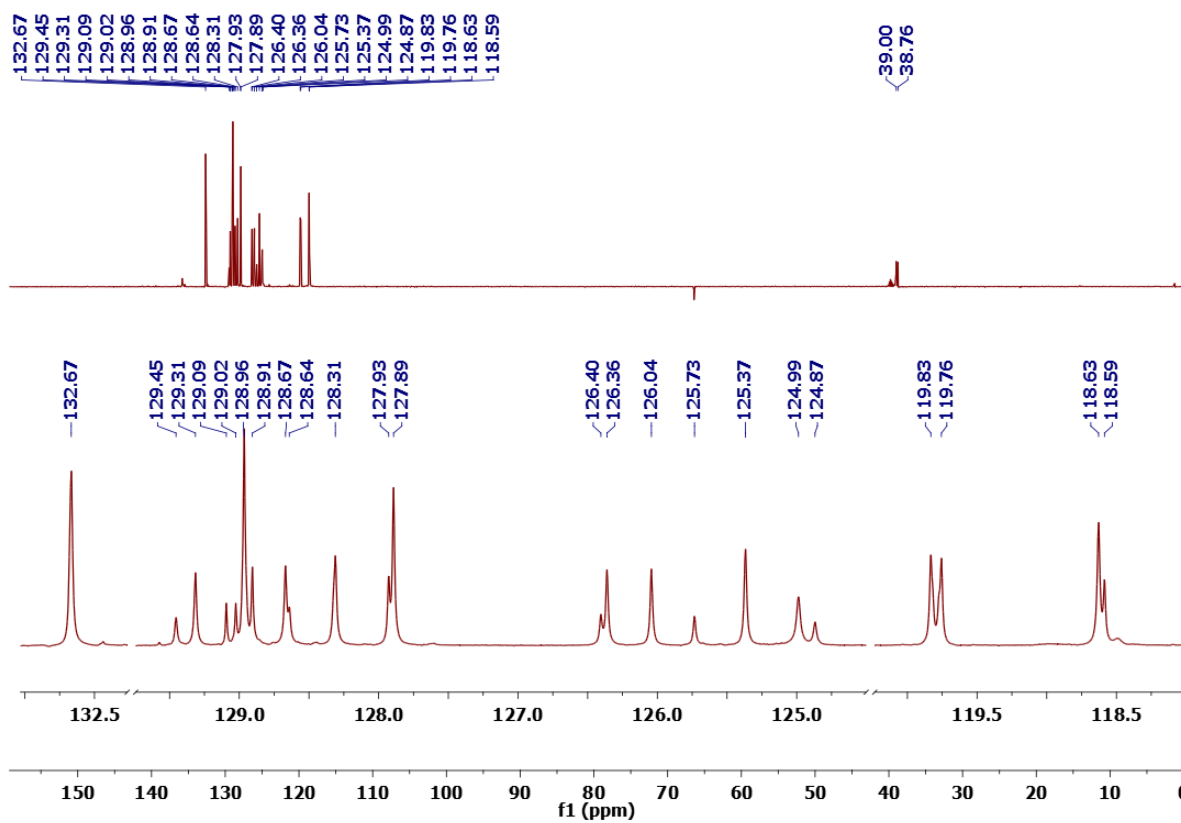

**$^1\text{H}$ - $^1\text{H}$  gDQCOSY NMR spectrum of (4'R,5'R)-4'-(4-chlorophenyl)-1''-phenyl-4'H-dispiro[fluorene-9,3'-pyrazole-5',4''-pyrazolidine]-3'',5''-dione (5d) and (4'S,5'R)-4'-(4-chlorophenyl)-1''-phenyl-4'H-dispiro[fluorene-9,3'-pyrazole-5',4''-pyrazolidine]-3'',5''-dione (5'd)**

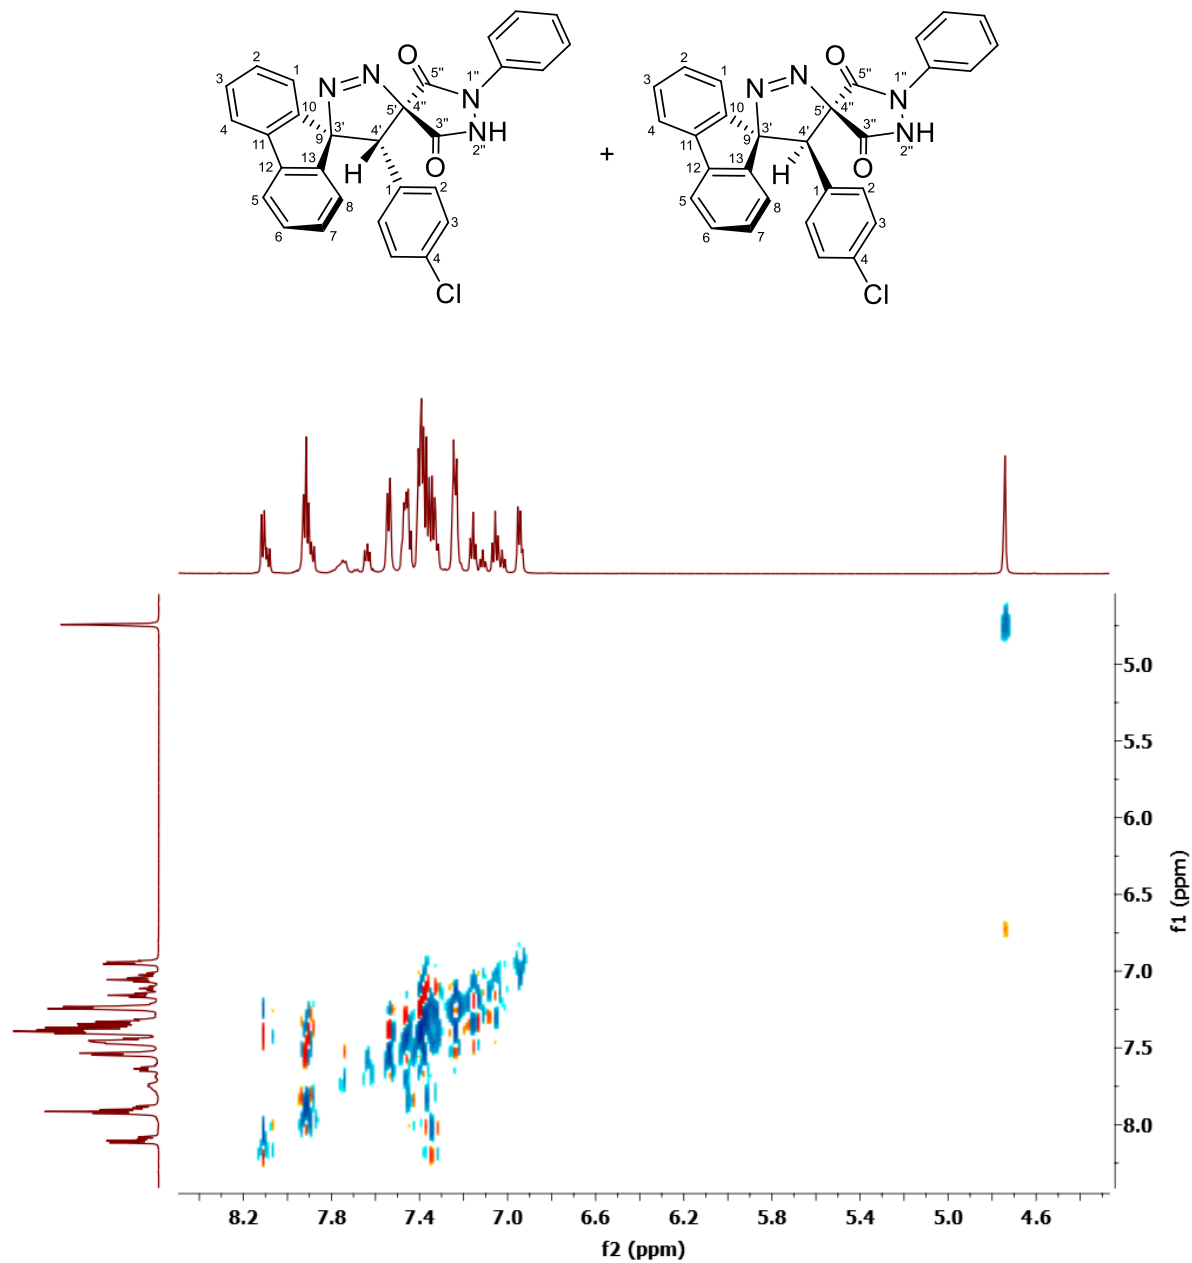

**$^1\text{H}$ - $^{13}\text{C}$ -HSQC NMR spectrum of (4'R,5'R)-4'-(4-chlorophenyl)-1''-phenyl-4'H-dispiro[fluorene-9,3'-pyrazole-5',4''-pyrazolidine]-3'',5''-dione (5d) and (4'S,5'S'R)-4'-(4-chlorophenyl)-1''-phenyl-4'H-dispiro[fluorene-9,3'-pyrazole-5',4''-pyrazolidine]-3'',5''-dione (5'd)**

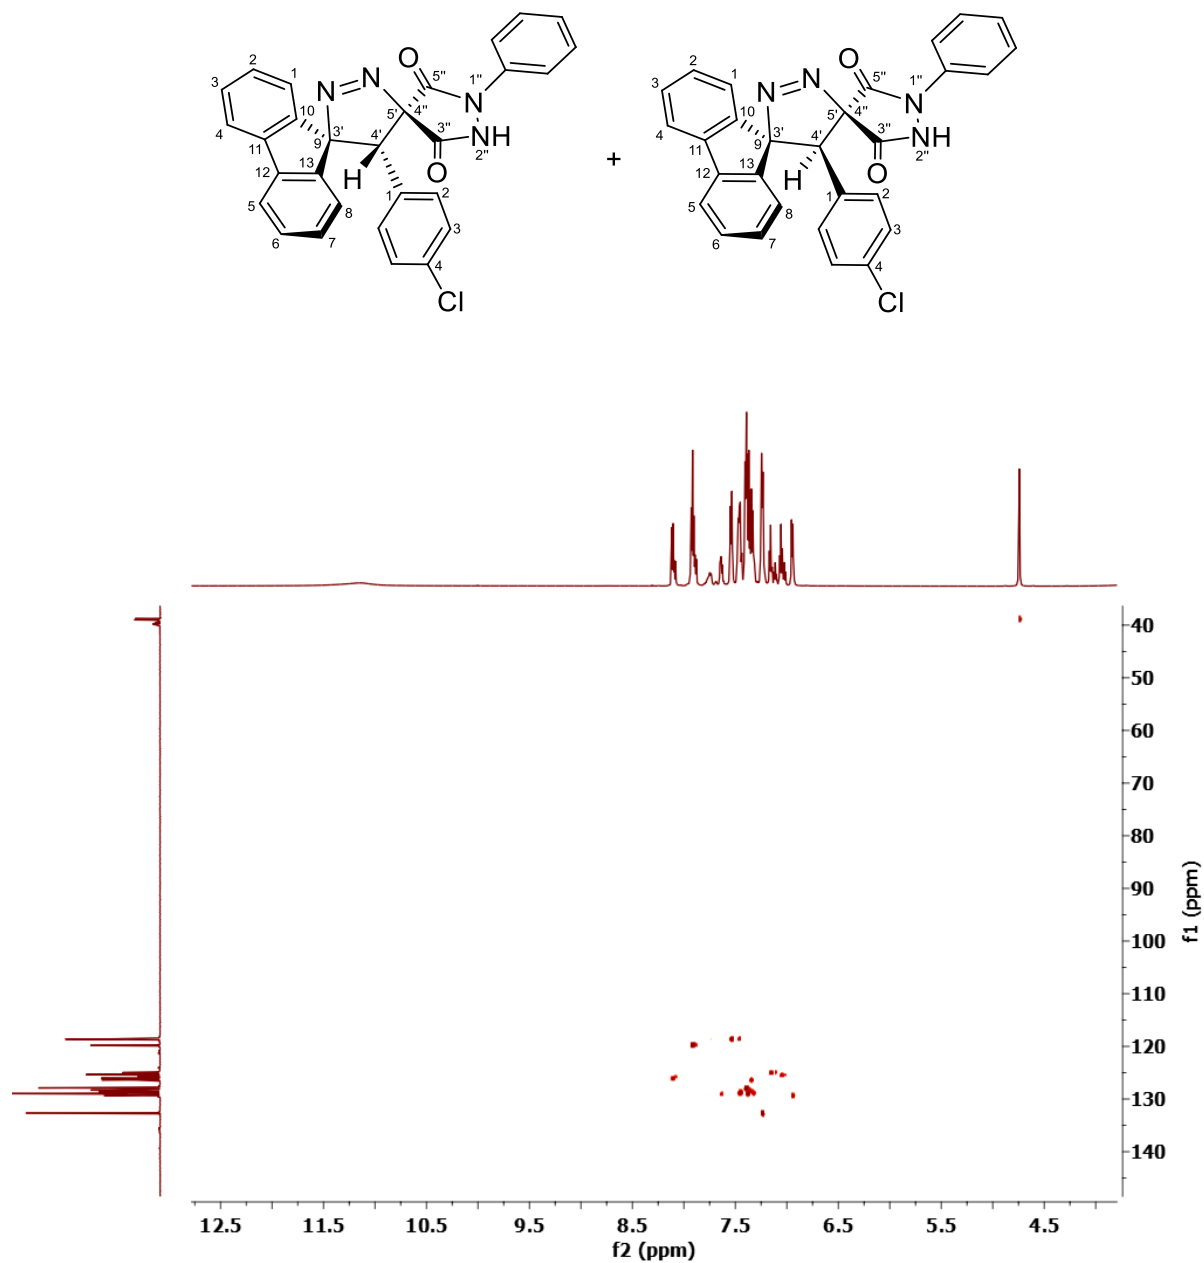

$^1\text{H}$ - $^{13}\text{C}$ -gHMBC NMR spectrum of (4'R,5'R)-4'-(4-chlorophenyl)-1''-phenyl-4'H-dispiro[fluorene-9,3'-pyrazole-5',4''-pyrazolidine]-3'',5''-dione (5d) and (4'S,5'S'R)-4'-(4-chlorophenyl)-1''-phenyl-4'H-dispiro[fluorene-9,3'-pyrazole-5',4''-pyrazolidine]-3'',5''-dione (5'd)

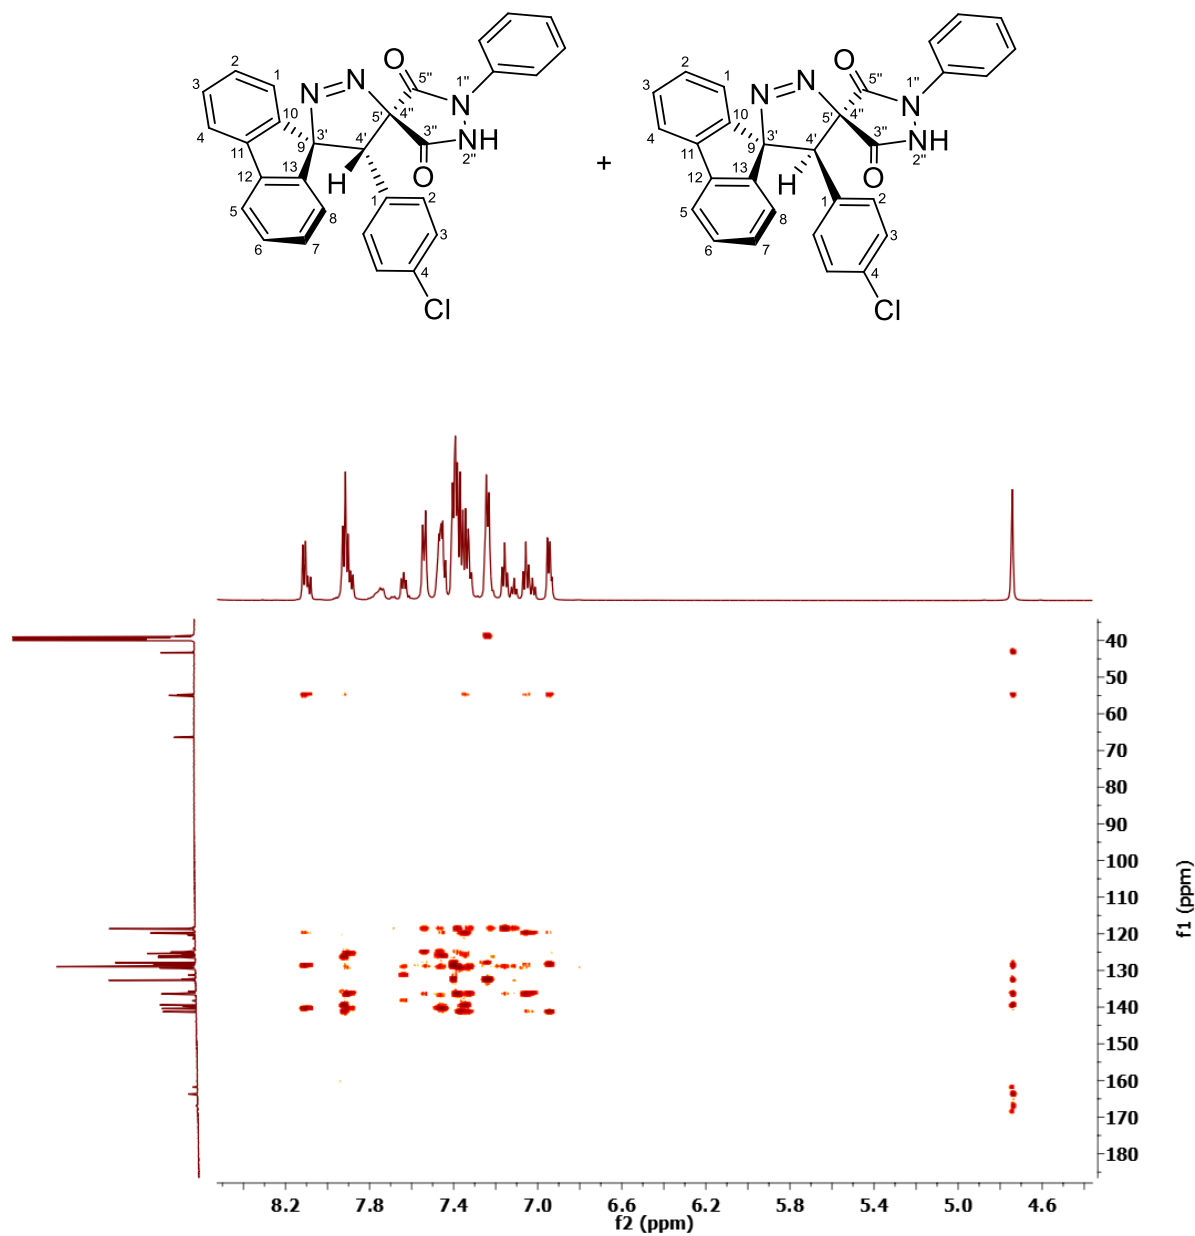

**$^1\text{H}$ - $^1\text{H}$ -ROESY NMR spectrum of (4'R,5'R)-4'-(4-chlorophenyl)-1''-phenyl-4'H-dispiro[fluorene-9,3'-pyrazole-5',4''-pyrazolidine]-3'',5''-dione (5d) and (4'S,5'SR)-4'-(4-chlorophenyl)-1''-phenyl-4'H-dispiro[fluorene-9,3'-pyrazole-5',4''-pyrazolidine]-3'',5''-dione (5'd)**

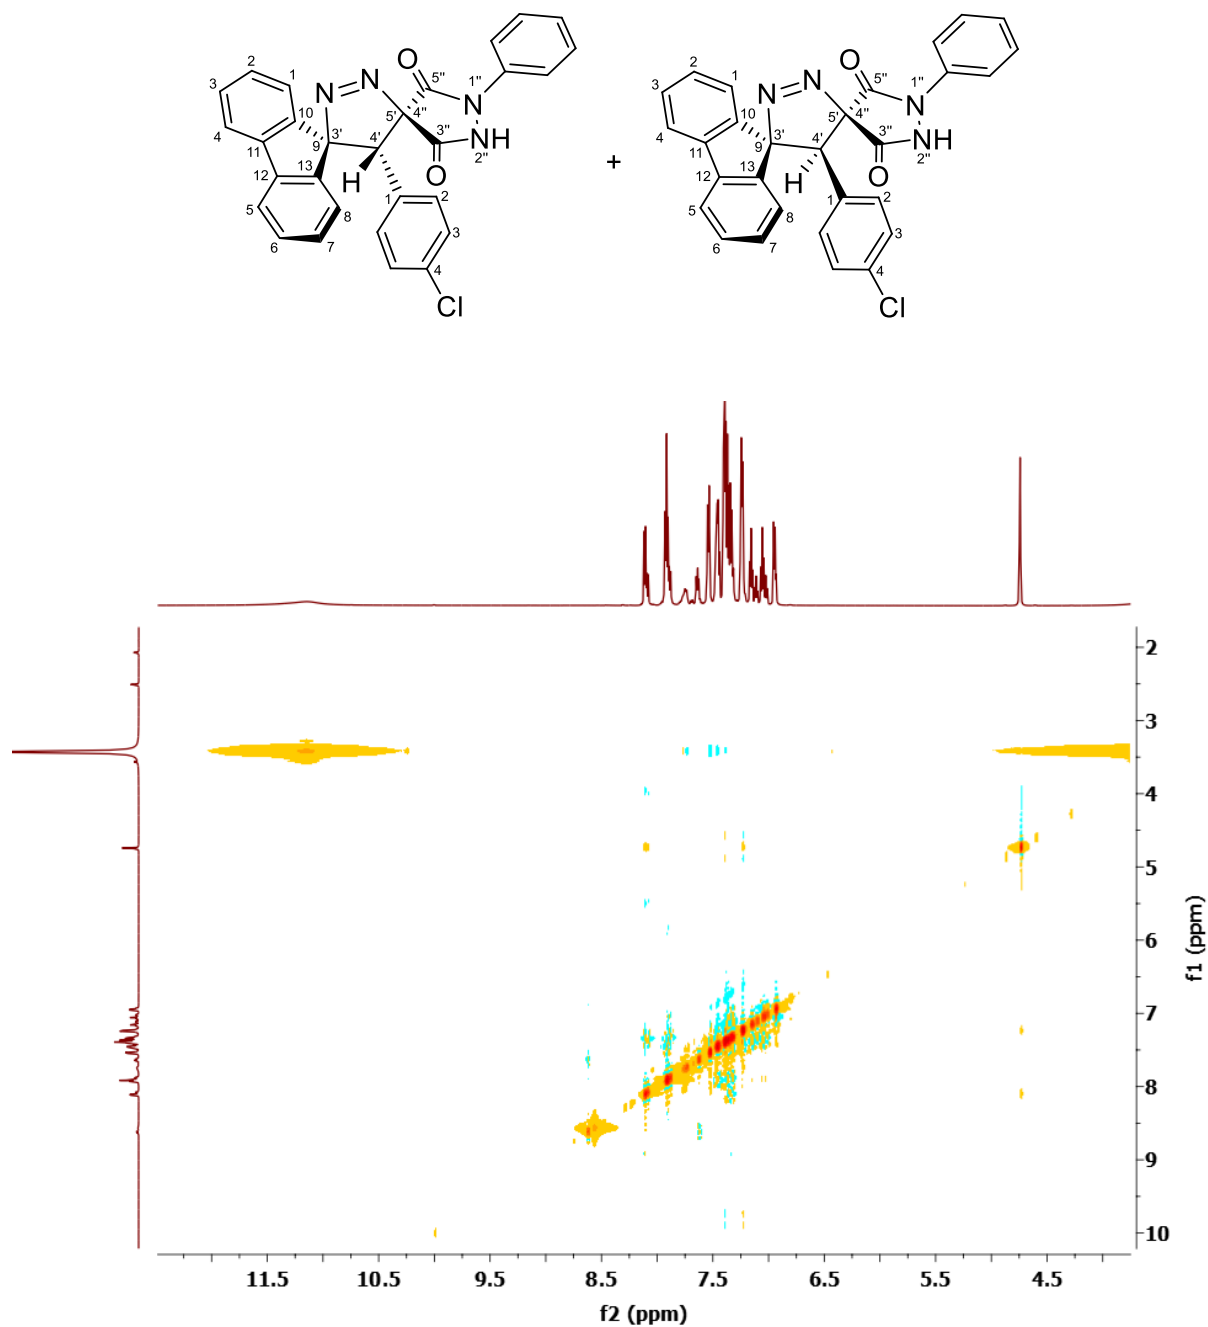

$^1\text{H}$  NMR spectrum of (4'R,5'R)-4'-(4-fluorophenyl)-1''-phenyl-4'H-dispiro[fluorene-9,3'-pyrazole-5',4''-pyrazolidine]-3'',5''-dione (5e) and (4'S,5'R)-4'-(4-fluorophenyl)-1''-phenyl-4'H-dispiro[fluorene-9,3'-pyrazole-5',4''-pyrazolidine]-3'',5''-dione (5'e)

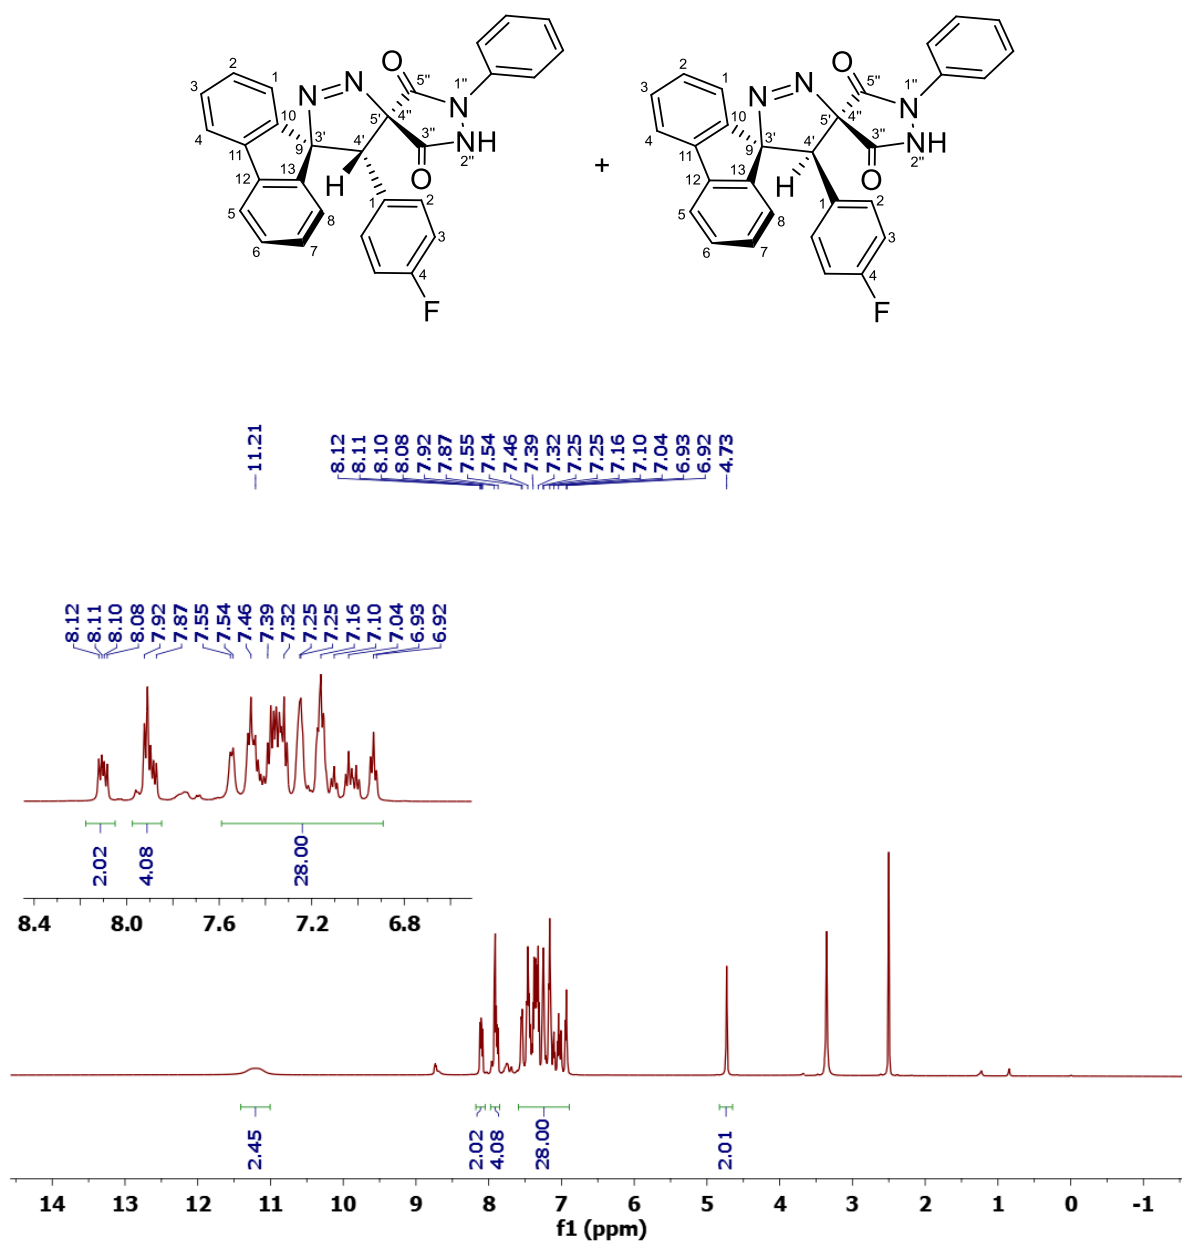

$^{13}\text{C}$  NMR spectrum of (4'R,5'R)-4'-(4-fluorophenyl)-1''-phenyl-4'H-dispiro[fluorene-9,3'-pyrazole-5',4''-pyrazolidine]-3'',5''-dione (5e) and (4'S,5'R)-4'-(4-fluorophenyl)-1''-phenyl-4'H-dispiro[fluorene-9,3'-pyrazole-5',4''-pyrazolidine]-3'',5''-dione (5'e)

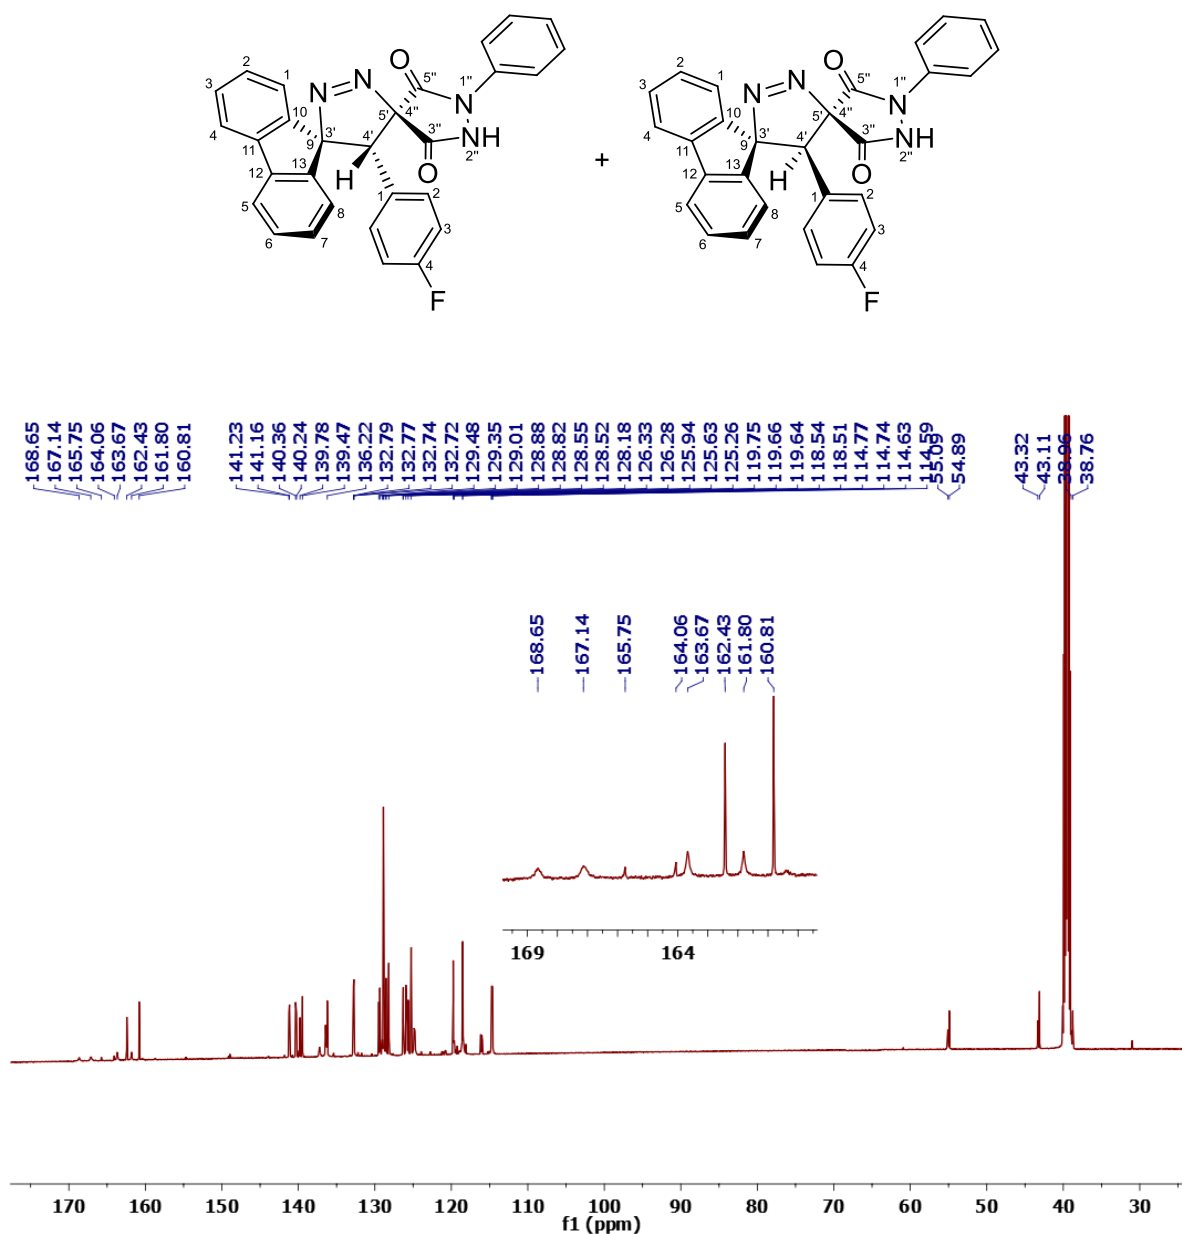

$^{13}\text{C}$  DEPT-135 NMR spectrum of (4'R,5'R)-4'-(4-fluorophenyl)-1''-phenyl-4'H-dispiro[fluorene-9,3'-pyrazole-5',4''-pyrazolidine]-3'',5''-dione (5e) and (4'S,5'R)-4'-(4-fluorophenyl)-1''-phenyl-4'H-dispiro[fluorene-9,3'-pyrazole-5',4''-pyrazolidine]-3'',5''-dione (5'e)

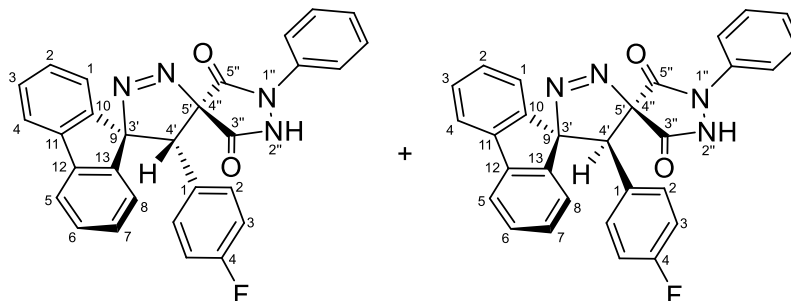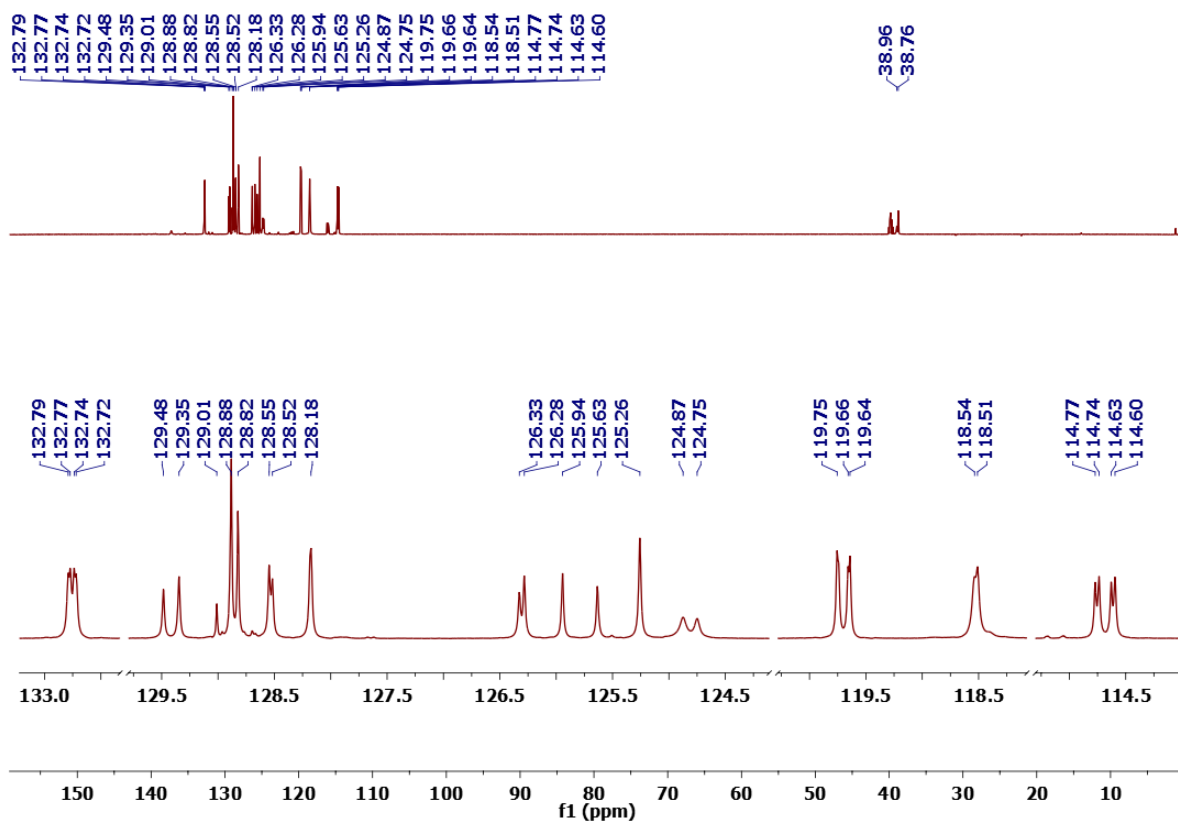

**$^1\text{H}$ - $^1\text{H}$  gDQCOSY NMR spectrum of (4'R,5'R)-4'-(4-fluorophenyl)-1''-phenyl-4'H-dispiro[fluorene-9,3'-pyrazole-5',4''-pyrazolidine]-3'',5''-dione (5e) and (4'S,5'R)-4'-(4-fluorophenyl)-1''-phenyl-4'H-dispiro[fluorene-9,3'-pyrazole-5',4''-pyrazolidine]-3'',5''-dione (5'e)**

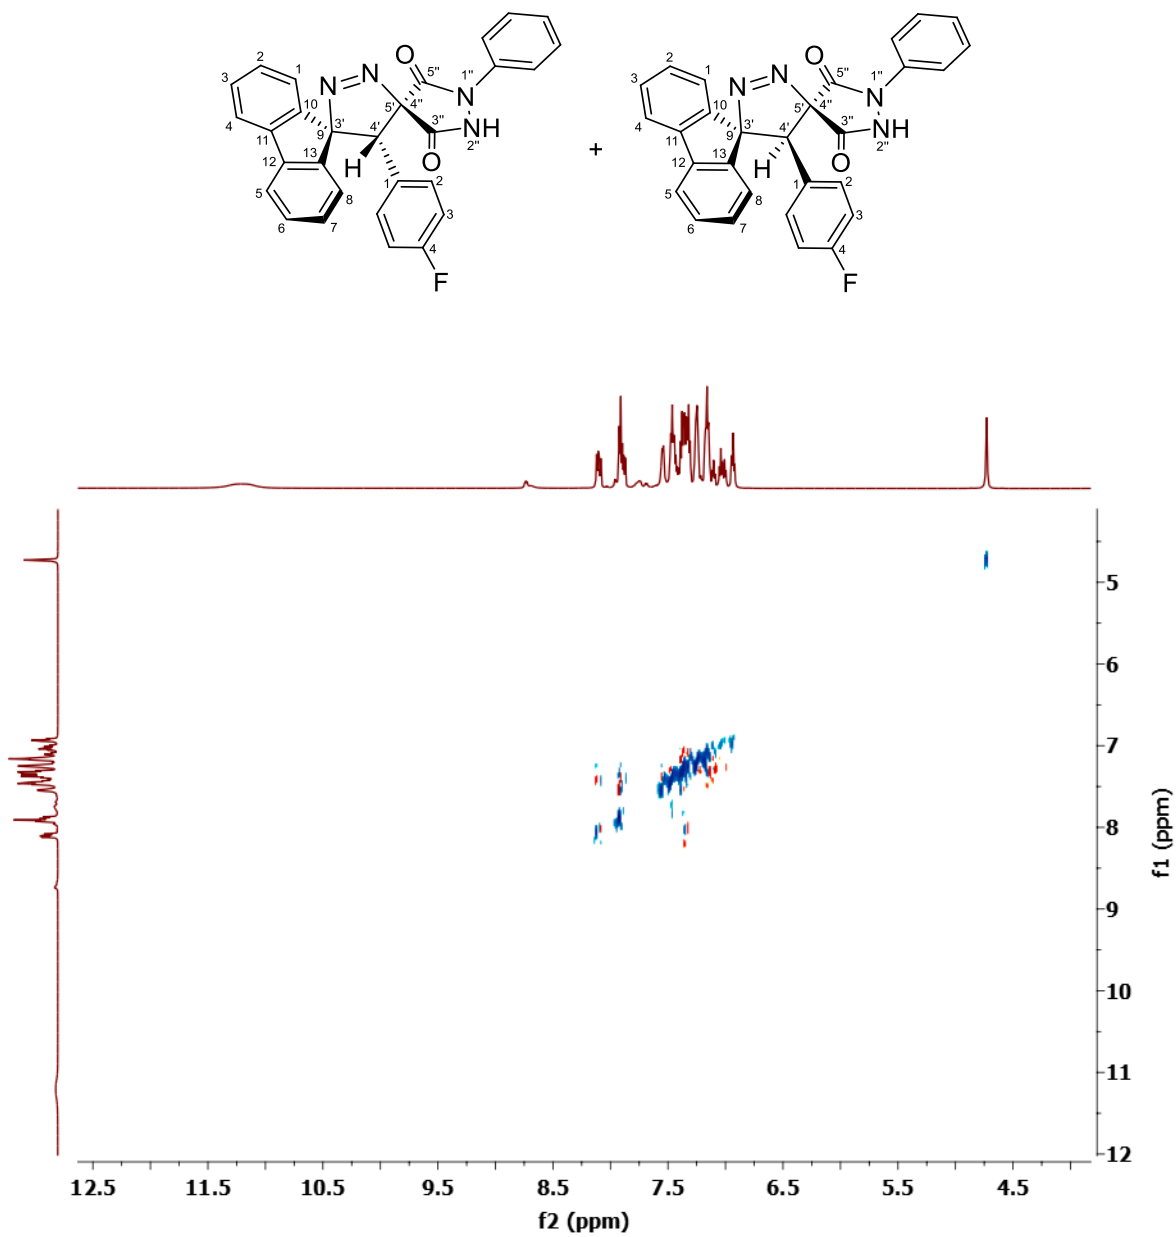

$^1\text{H}$ - $^{13}\text{C}$ -HSQC NMR spectrum of (4'R,5'R)-4'-(4-fluorophenyl)-1''-phenyl-4'H-dispiro[fluorene-9,3'-pyrazole-5',4''-pyrazolidine]-3'',5''-dione (5e) and (4'S,5'R)-4'-(4-fluorophenyl)-1''-phenyl-4'H-dispiro[fluorene-9,3'-pyrazole-5',4''-pyrazolidine]-3'',5''-dione (5'e)

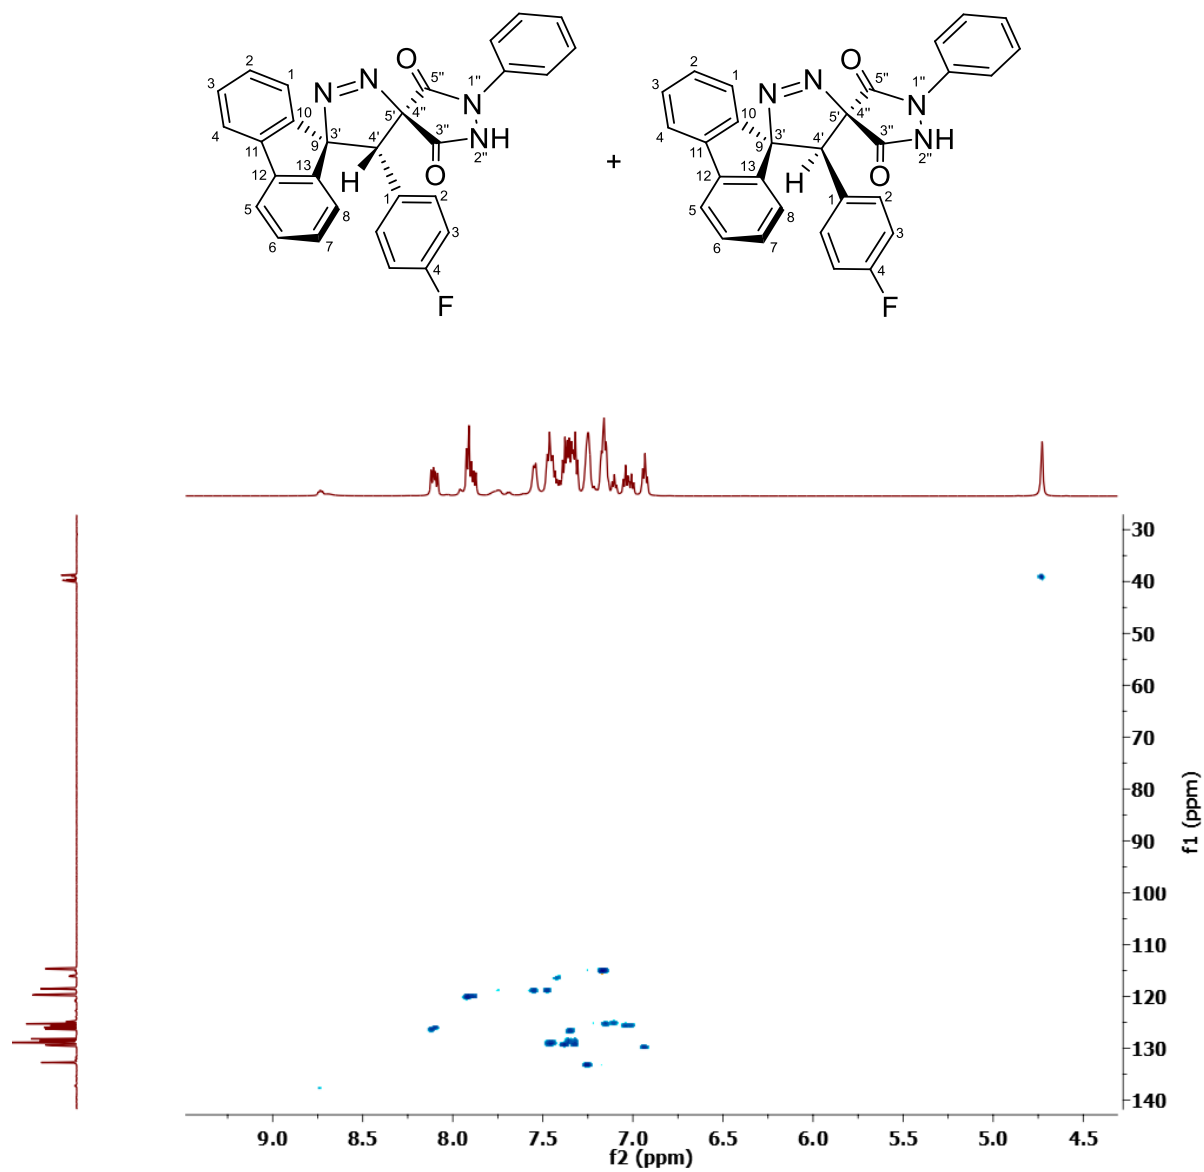

$^1\text{H}$ - $^{13}\text{C}$ -gHMBC NMR spectrum of (4'R,5'R)-4'-(4-fluorophenyl)-1''-phenyl-4'H-dispiro[fluorene-9,3'-pyrazole-5',4''-pyrazolidine]-3'',5''-dione (5e) and (4'S,5'SR)-4'-(4-fluorophenyl)-1''-phenyl-4'H-dispiro[fluorene-9,3'-pyrazole-5',4''-pyrazolidine]-3'',5''-dione (5'e)

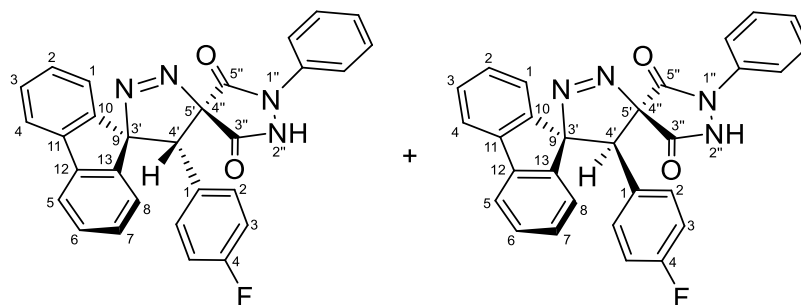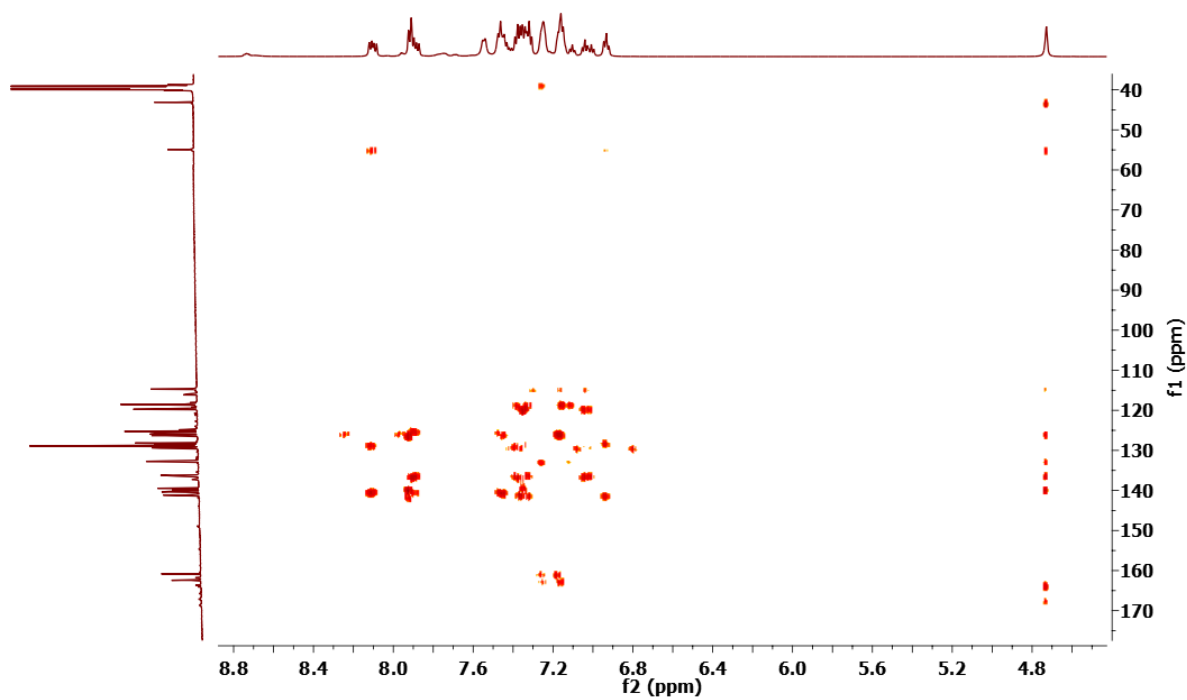

<sup>1</sup>H NMR spectrum of (4'R,5'R)-4'-(4-cyanophenyl)-1''-phenyl-4'H-dispiro[fluorene-9,3'-pyrazole-5',4''-pyrazolidine]-3'',5''-dione (5f) and (4'S,5'R)-4'-(4-cyanophenyl)-1''-phenyl-4'H-dispiro[fluorene-9,3'-pyrazole-5',4''-pyrazolidine]-3'',5''-dione (5f')

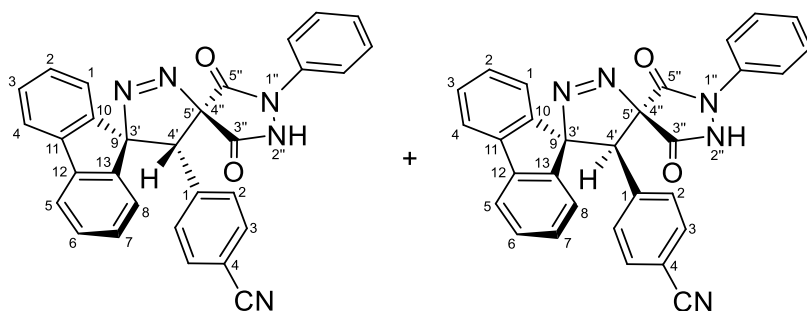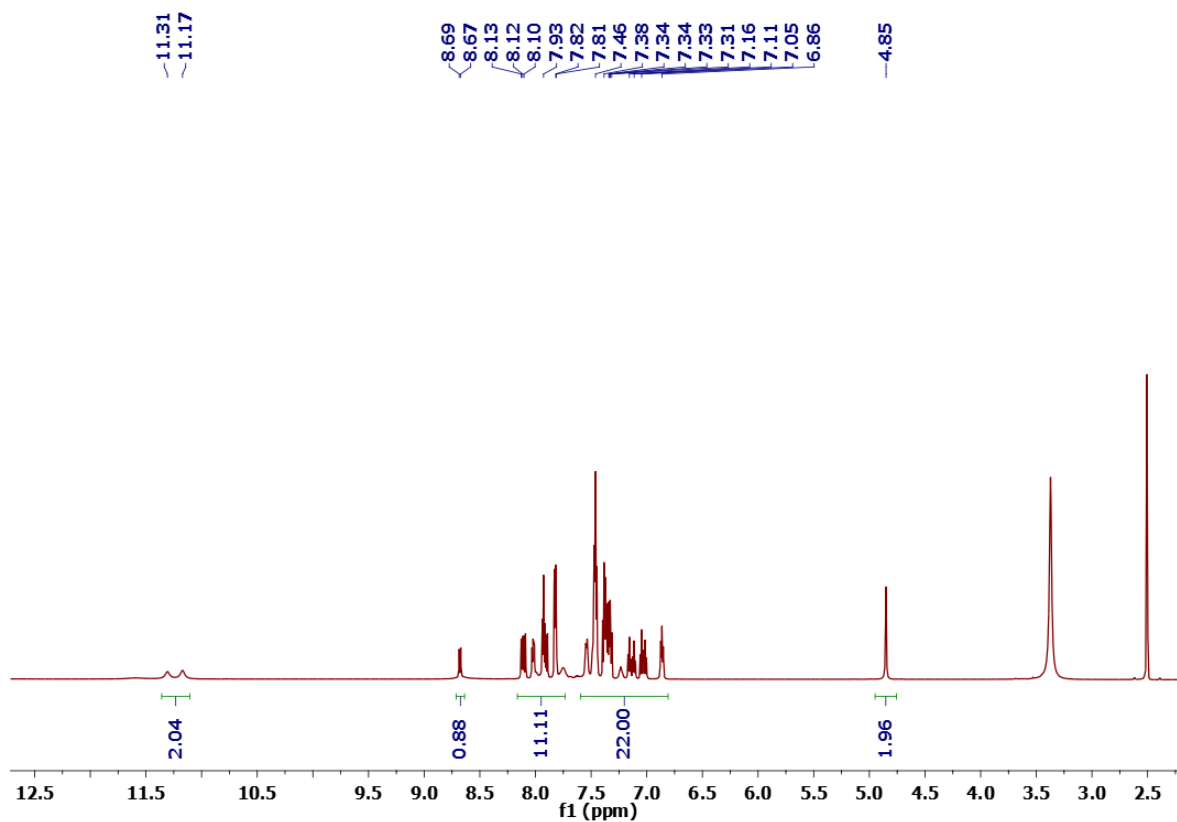

$^{13}\text{C}$  NMR spectrum of (4'R,5'R)-4'-(4-cyanophenyl)-1''-phenyl-4'H-dispiro[fluorene-9,3'-pyrazole-5',4''-pyrazolidine]-3'',5''-dione (5f) and (4'S,5'R)-4'-(4-cyanophenyl)-1''-phenyl-4'H-dispiro[fluorene-9,3'-pyrazole-5',4''-pyrazolidine]-3'',5''-dione (5f')

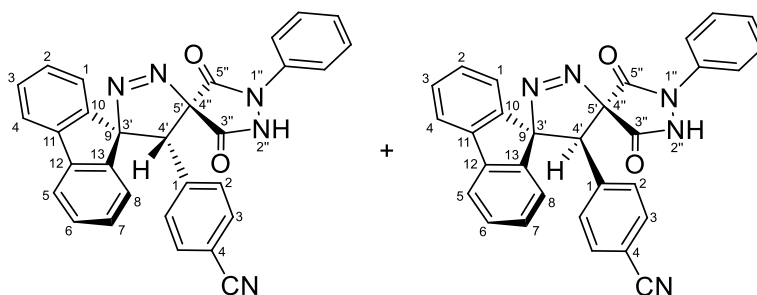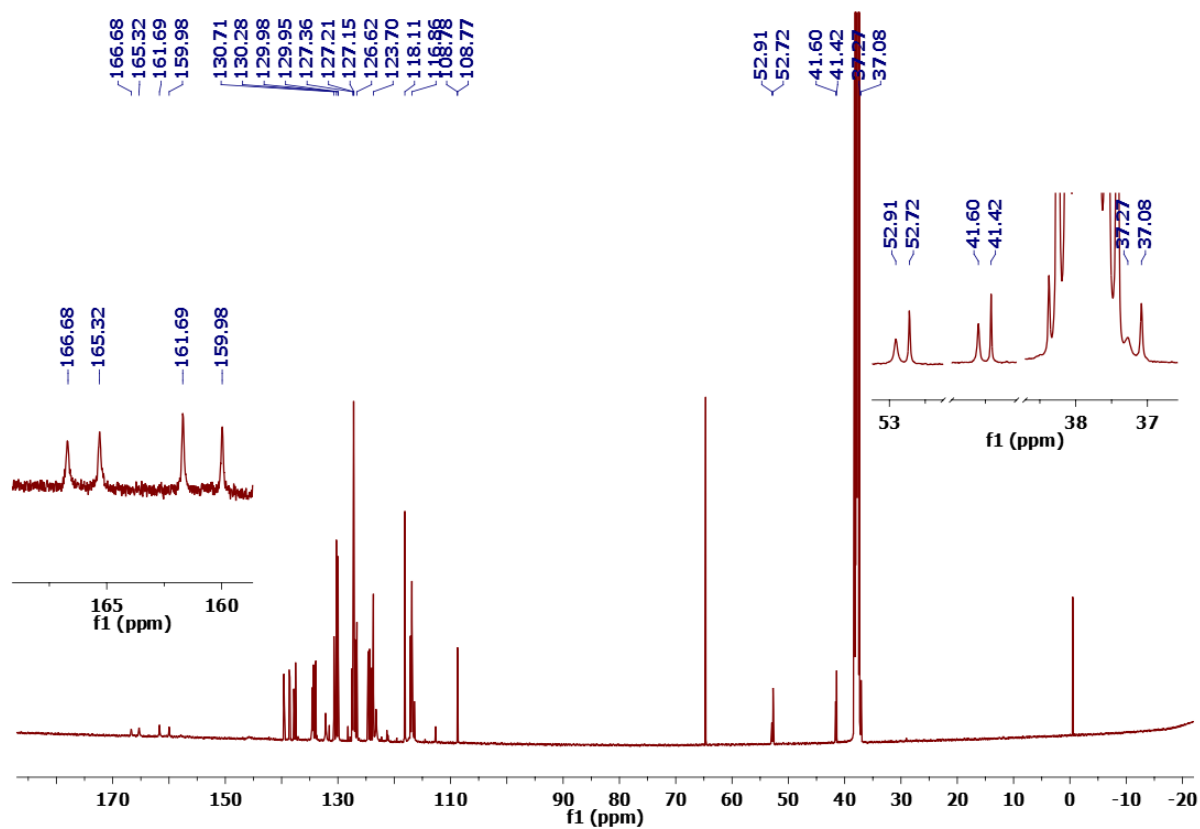

$^{13}\text{C}$  DEPT-135 NMR spectrum of (4'R,5'R)-4'-(4-cyanophenyl)-1''-phenyl-4'H-dispiro[fluorene-9,3'-pyrazole-5',4''-pyrazolidine]-3'',5''-dione (5f) and (4'S,5'S)-4'-(4-cyanophenyl)-1''-phenyl-4'H-dispiro[fluorene-9,3'-pyrazole-5',4''-pyrazolidine]-3'',5''-dione (5'f)

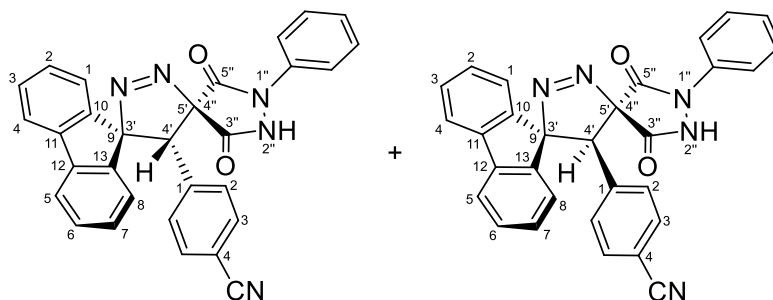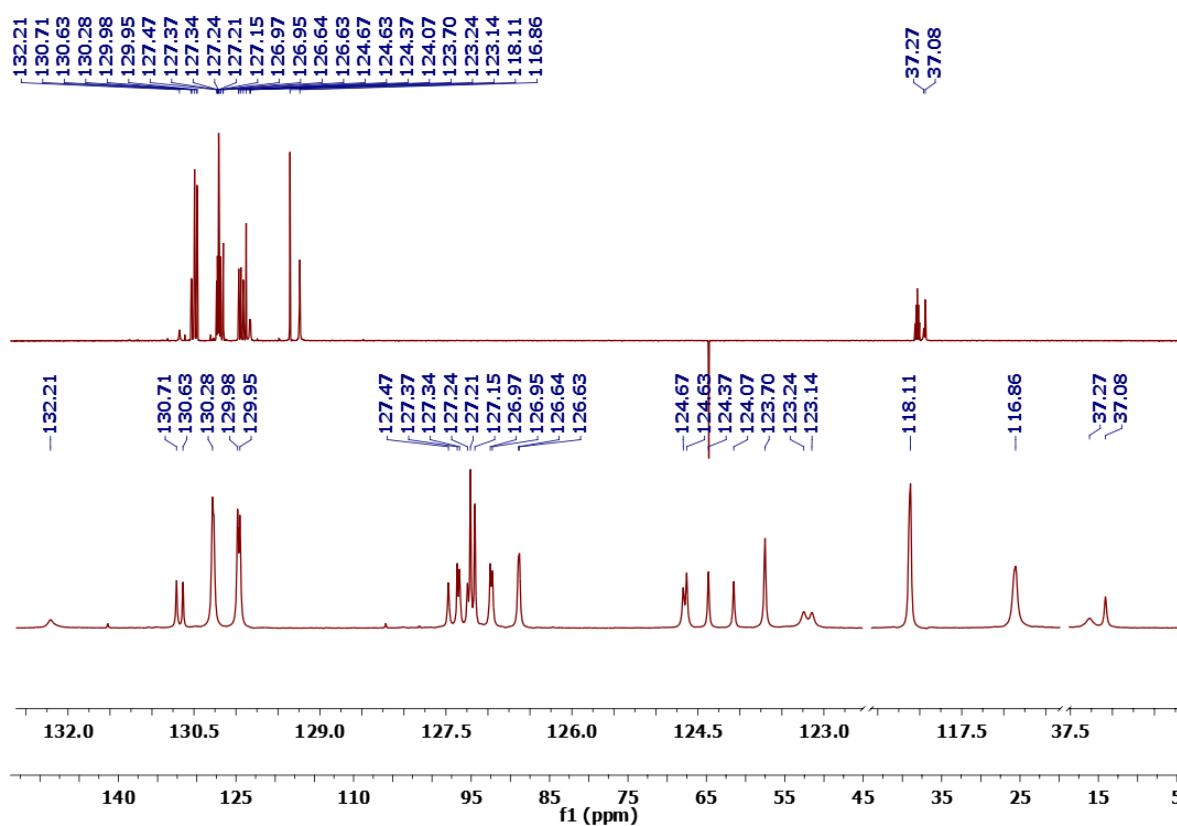

**$^1\text{H}$ - $^1\text{H}$  gDQCOSY NMR spectrum of (4'R,5'R)-4'-(4-cyanophenyl)-1''-phenyl-4'H-dispiro[fluorene-9,3'-pyrazole-5',4''-pyrazolidine]-3'',5''-dione (5f) and (4'S,5'R)-4'-(4-cyanophenyl)-1''-phenyl-4'H-dispiro[fluorene-9,3'-pyrazole-5',4''-pyrazolidine]-3'',5''-dione (5'f)**

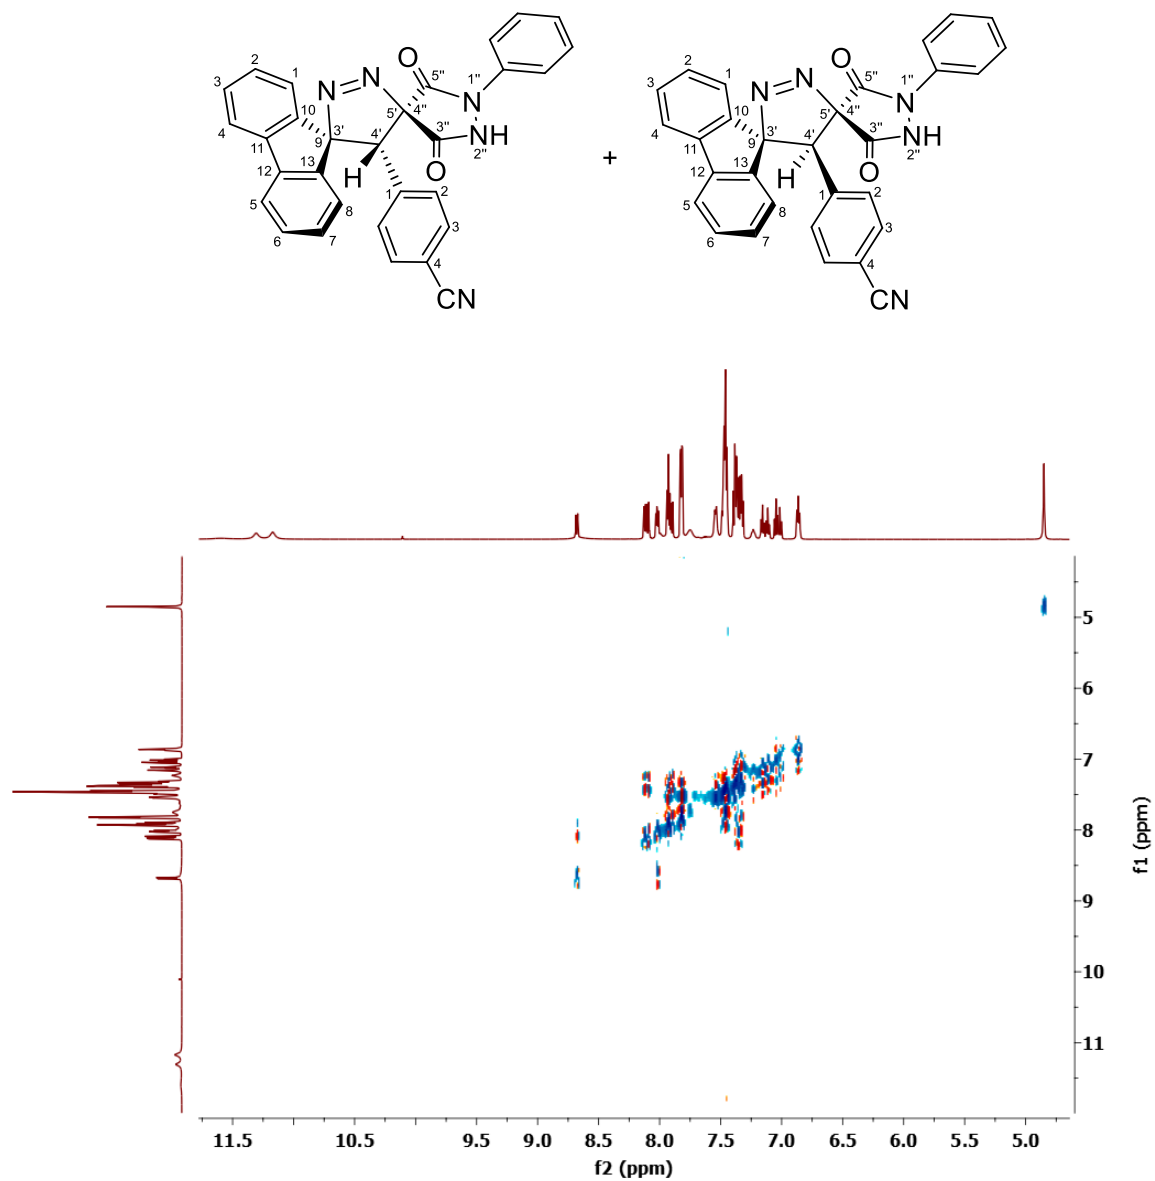

$^1\text{H}$ - $^{13}\text{C}$ -HSQC NMR spectrum of (4'R,5'R)-4'-(4-cyanophenyl)-1''-phenyl-4'H-dispiro[fluorene-9,3'-pyrazole-5',4''-pyrazolidine]-3'',5''-dione (5f) and (4'S,5'SR)-4'-(4-cyanophenyl)-1''-phenyl-4'H-dispiro[fluorene-9,3'-pyrazole-5',4''-pyrazolidine]-3'',5''-dione (5'f)

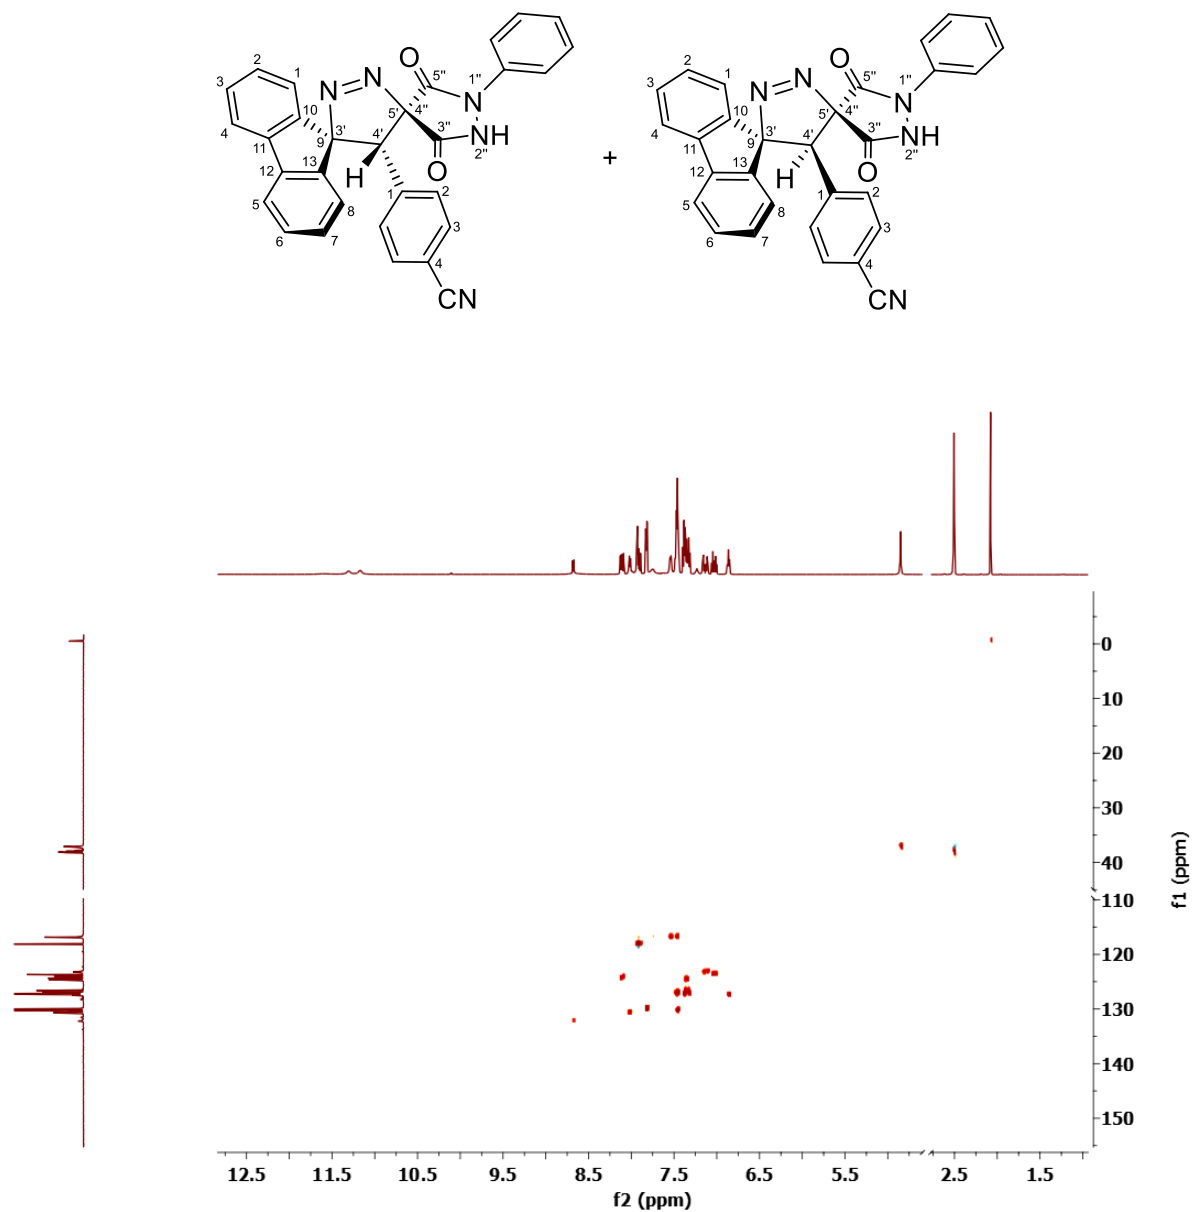

$^1\text{H}$ - $^{13}\text{C}$ -gHMBC NMR spectrum of (4'R,5'R)-4'-(4-cyanophenyl)-1''-phenyl-4'H-dispiro[fluorene-9,3'-pyrazole-5',4''-pyrazolidine]-3'',5''-dione (5f) and (4'S,5'R)-4'-(4-cyanophenyl)-1''-phenyl-4'H-dispiro[fluorene-9,3'-pyrazole-5',4''-pyrazolidine]-3'',5''-dione (5'f)

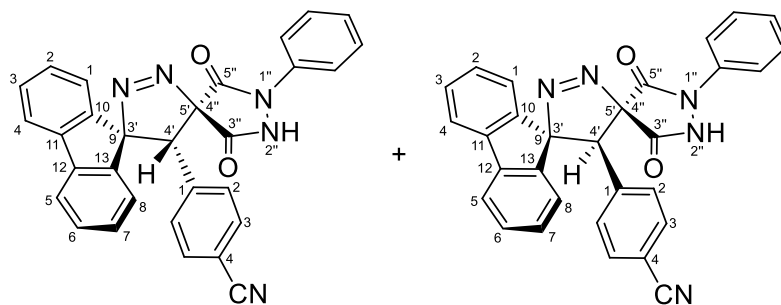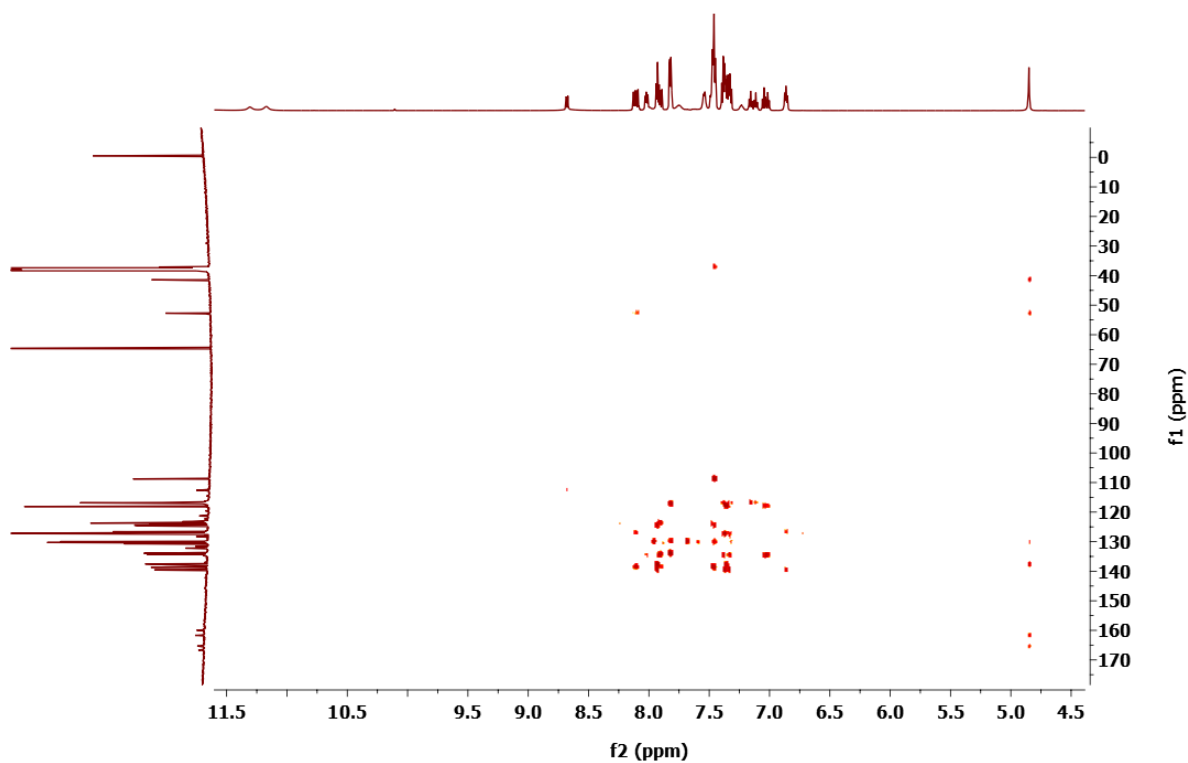

<sup>1</sup>H NMR spectrum of (4'R,5'R)-4'-(4-nitrophenyl)-1''-phenyl-4'H-dispiro[fluorene-9,3'-pyrazole-5',4''-pyrazolidine]-3'',5''-dione (5g) and (4'S,5'R)-4'-(4-nitrophenyl)-1''-phenyl-4'H-dispiro[fluorene-9,3'-pyrazole-5',4''-pyrazolidine]-3'',5''-dione (5'g)

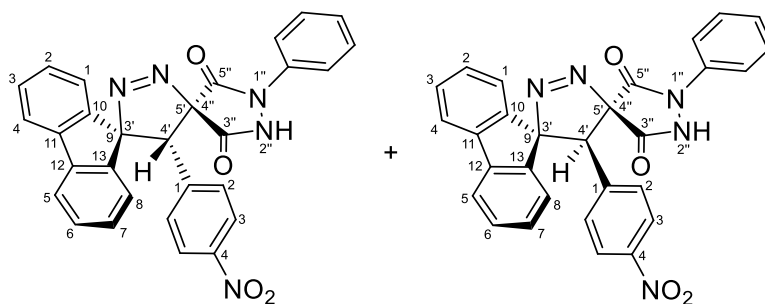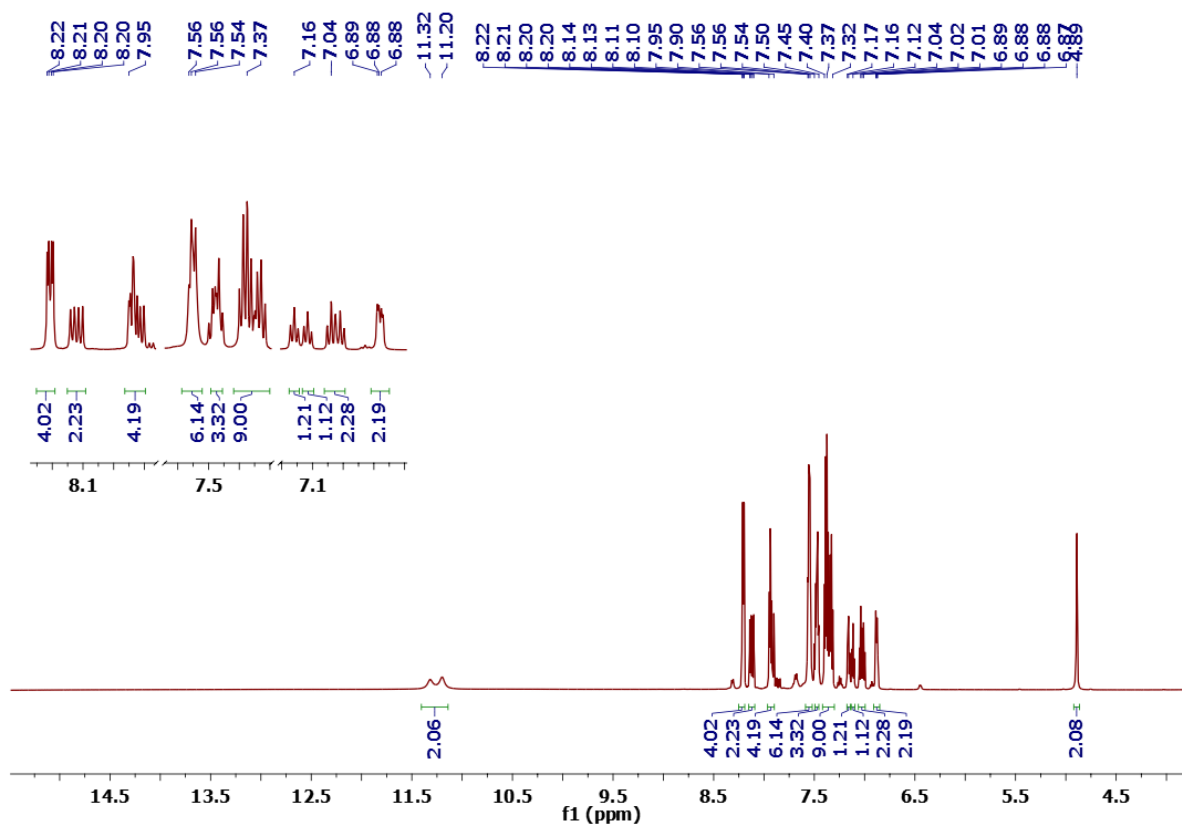

$^{13}\text{C}$  NMR spectrum of (4'R,5'R)-4'-(4-nitrophenyl)-1''-phenyl-4'H-dispiro[fluorene-9,3'-pyrazole-5',4''-pyrazolidine]-3'',5''-dione (5g) and (4'S,5'R)-4'-(4-nitrophenyl)-1''-phenyl-4'H-dispiro[fluorene-9,3'-pyrazole-5',4''-pyrazolidine]-3'',5''-dione (5'g)

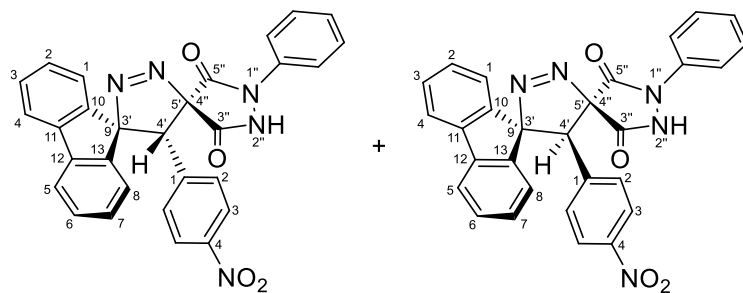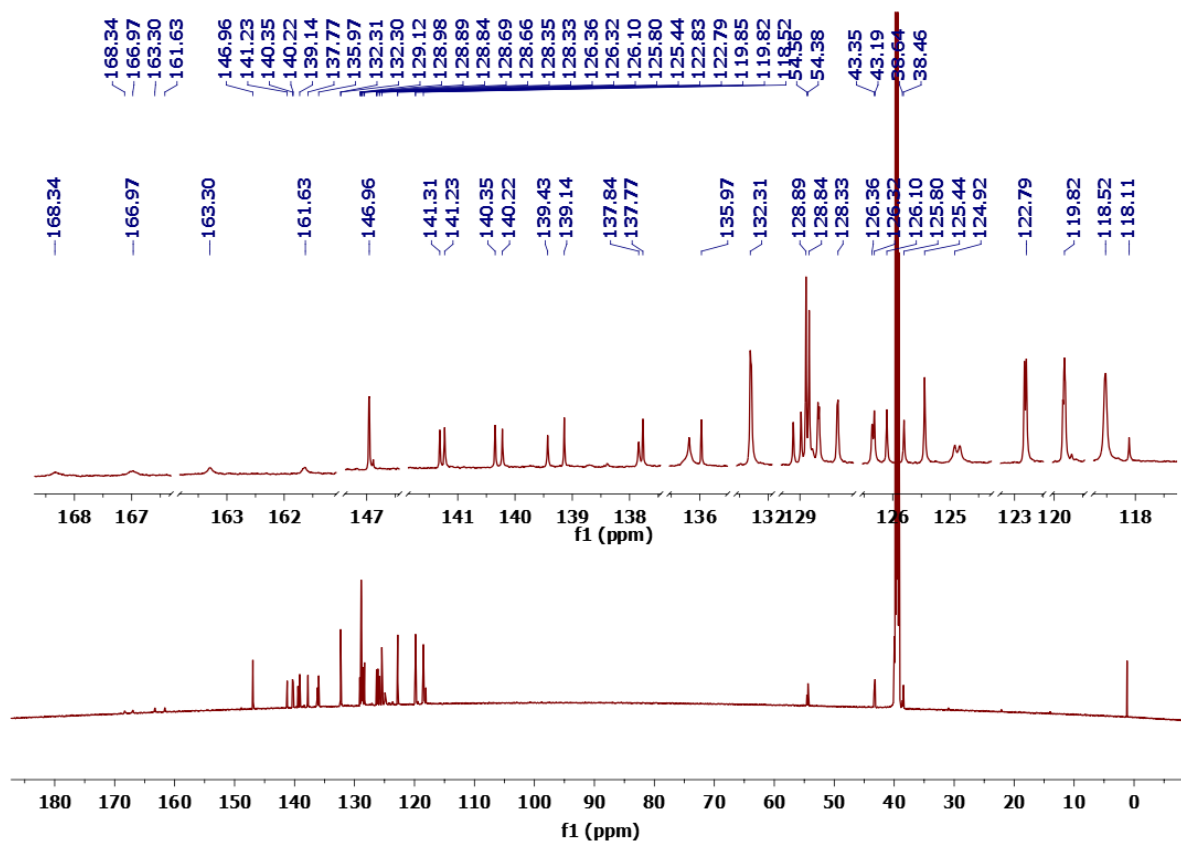

$^{13}\text{C}$  DEPT-135 NMR spectrum of (4'R,5'R)-4'-(4-nitrophenyl)-1''-phenyl-4'H-dispiro[fluorene-9,3'-pyrazole-5',4''-pyrazolidine]-3'',5''-dione (5g) and (4'S,5'R)-4'-(4-nitrophenyl)-1''-phenyl-4'H-dispiro[fluorene-9,3'-pyrazole-5',4''-pyrazolidine]-3'',5''-dione (5'g)

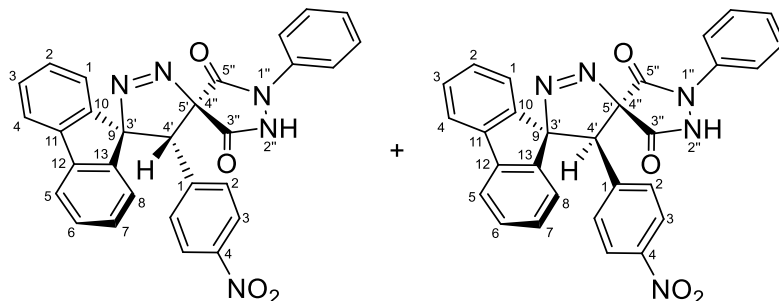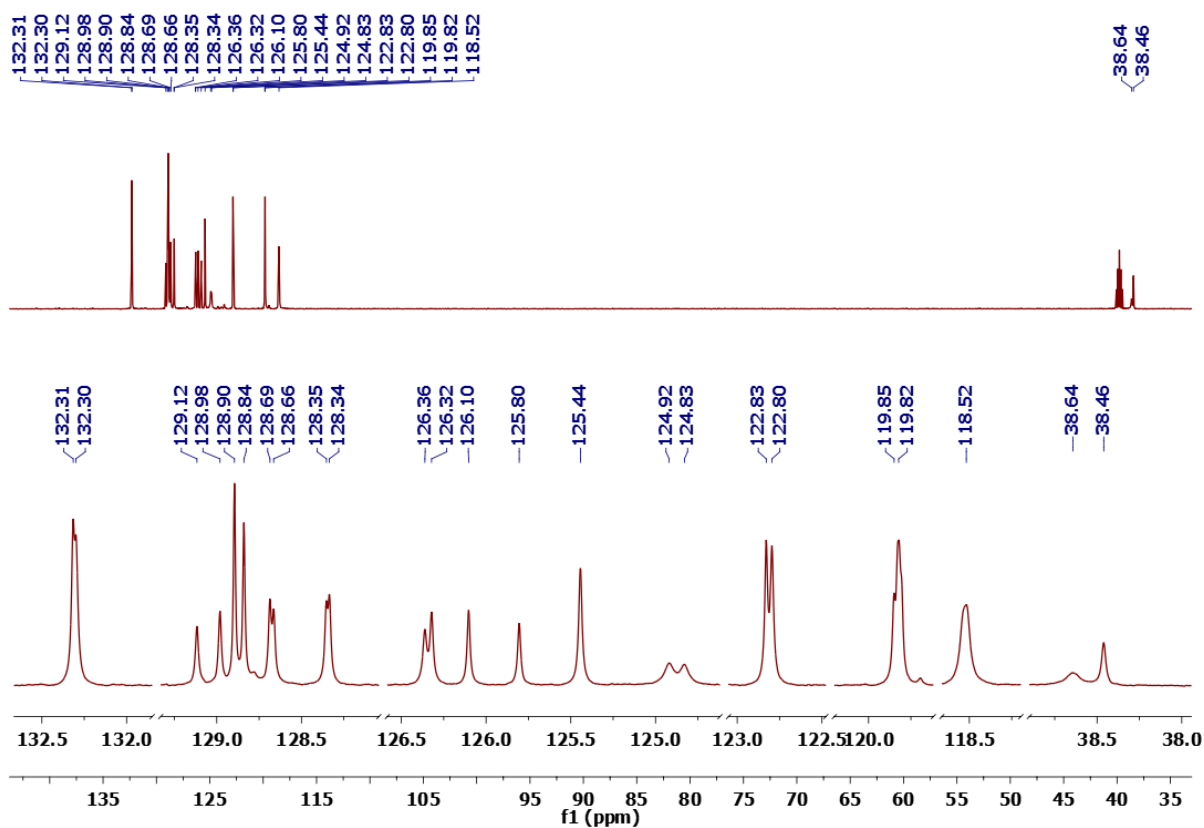

**$^1\text{H}$ - $^1\text{H}$  gDQCOSY NMR spectrum of (4'R,5'R)-4'-(4-nitrophenyl)-1''-phenyl-4'H-dispiro[fluorene-9,3'-pyrazole-5',4''-pyrazolidine]-3'',5''-dione (5g) and (4'S,5'R)-4'-(4-nitrophenyl)-1''-phenyl-4'H-dispiro[fluorene-9,3'-pyrazole-5',4''-pyrazolidine]-3'',5''-dione (5'g)**

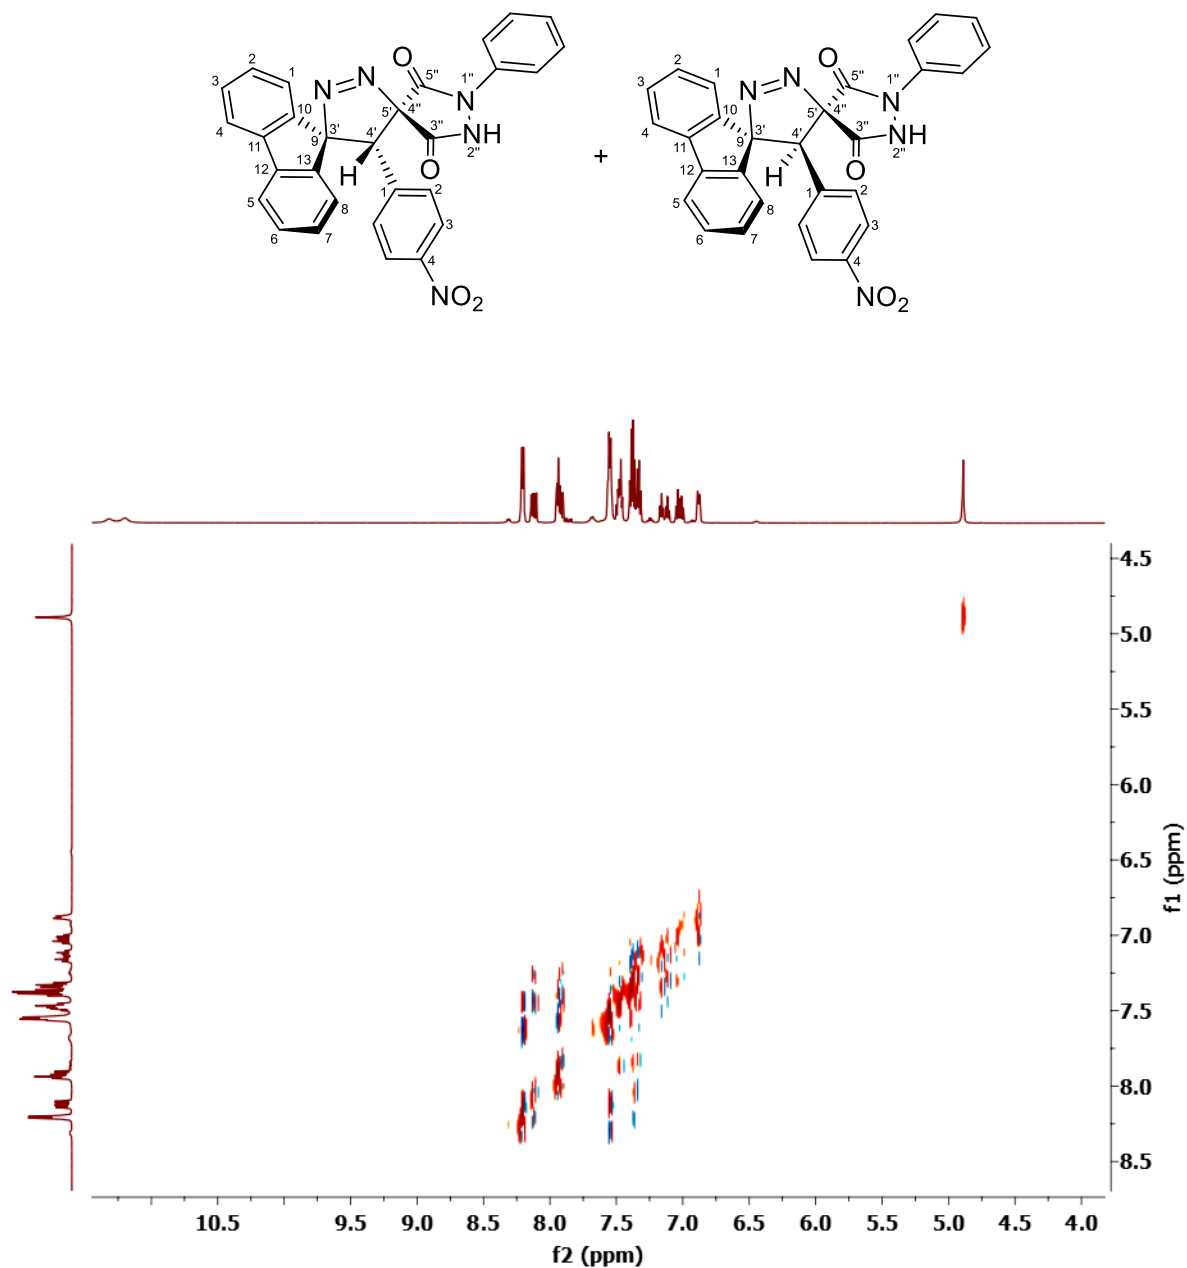

$^1\text{H}$ - $^{13}\text{C}$ -HSQC NMR spectrum of (4'R,5'R)-4'-(4-nitrophenyl)-1''-phenyl-4'H-dispiro[fluorene-9,3'-pyrazole-5',4''-pyrazolidine]-3'',5''-dione (5g) and (4'S,5'S'R)-4'-(4-nitrophenyl)-1''-phenyl-4'H-dispiro[fluorene-9,3'-pyrazole-5',4''-pyrazolidine]-3'',5''-dione (5'g)

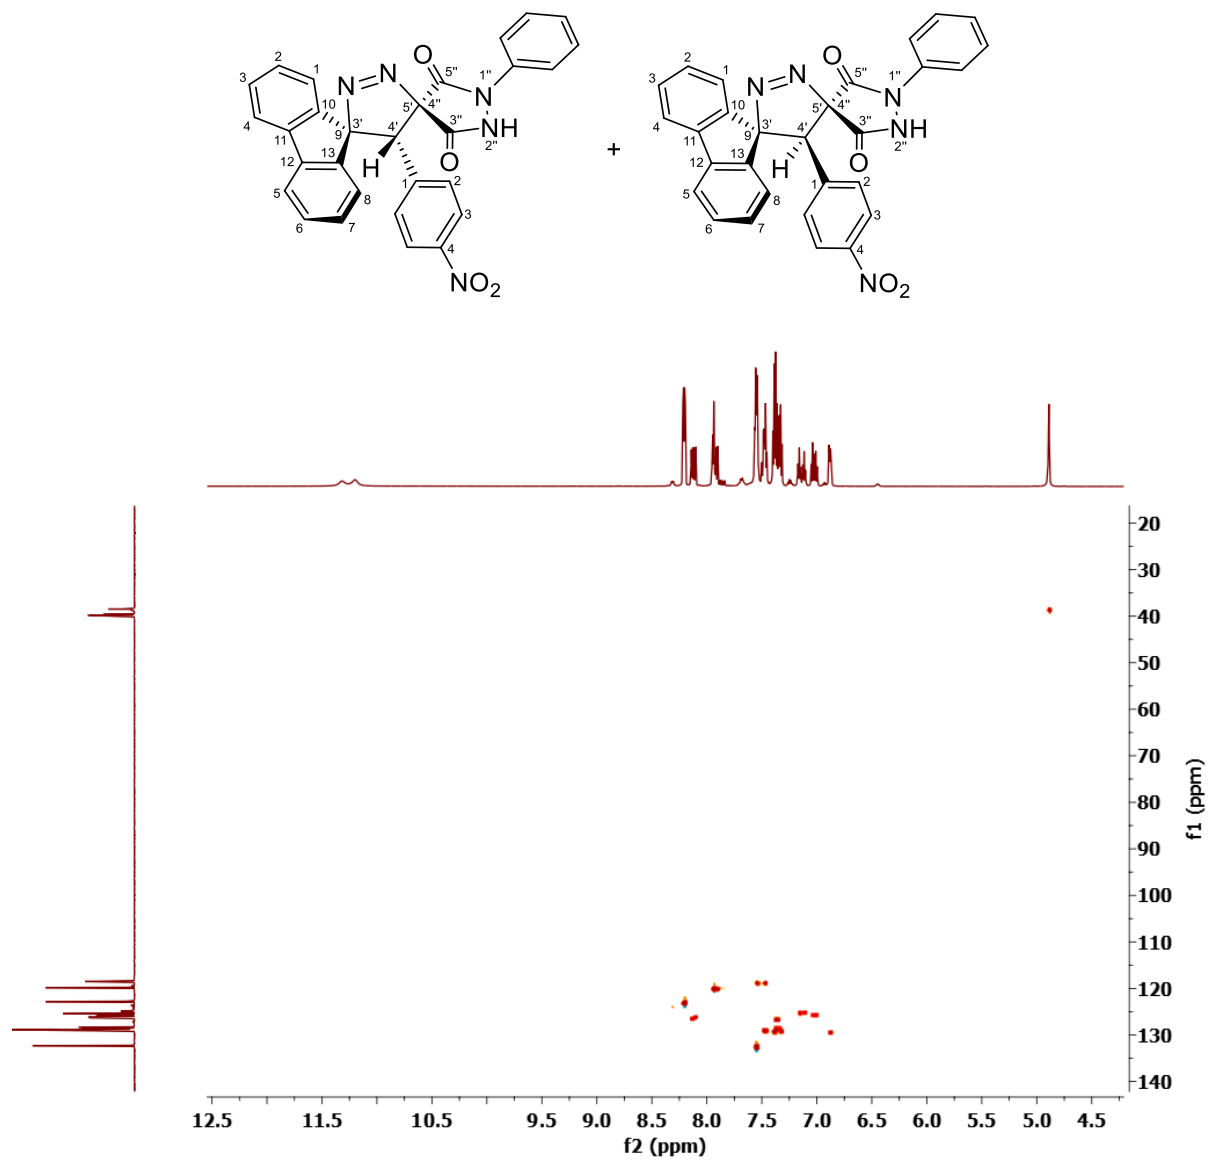

$^1\text{H}$ - $^{13}\text{C}$ -gHMBC NMR spectrum of (4'R,5'R)-4'-(4-nitrophenyl)-1''-phenyl-4'H-dispiro[fluorene-9,3'-pyrazole-5',4''-pyrazolidine]-3'',5''-dione (5g) and (4'S,5'R)-4'-(4-nitrophenyl)-1''-phenyl-4'H-dispiro[fluorene-9,3'-pyrazole-5',4''-pyrazolidine]-3'',5''-dione (5'g)

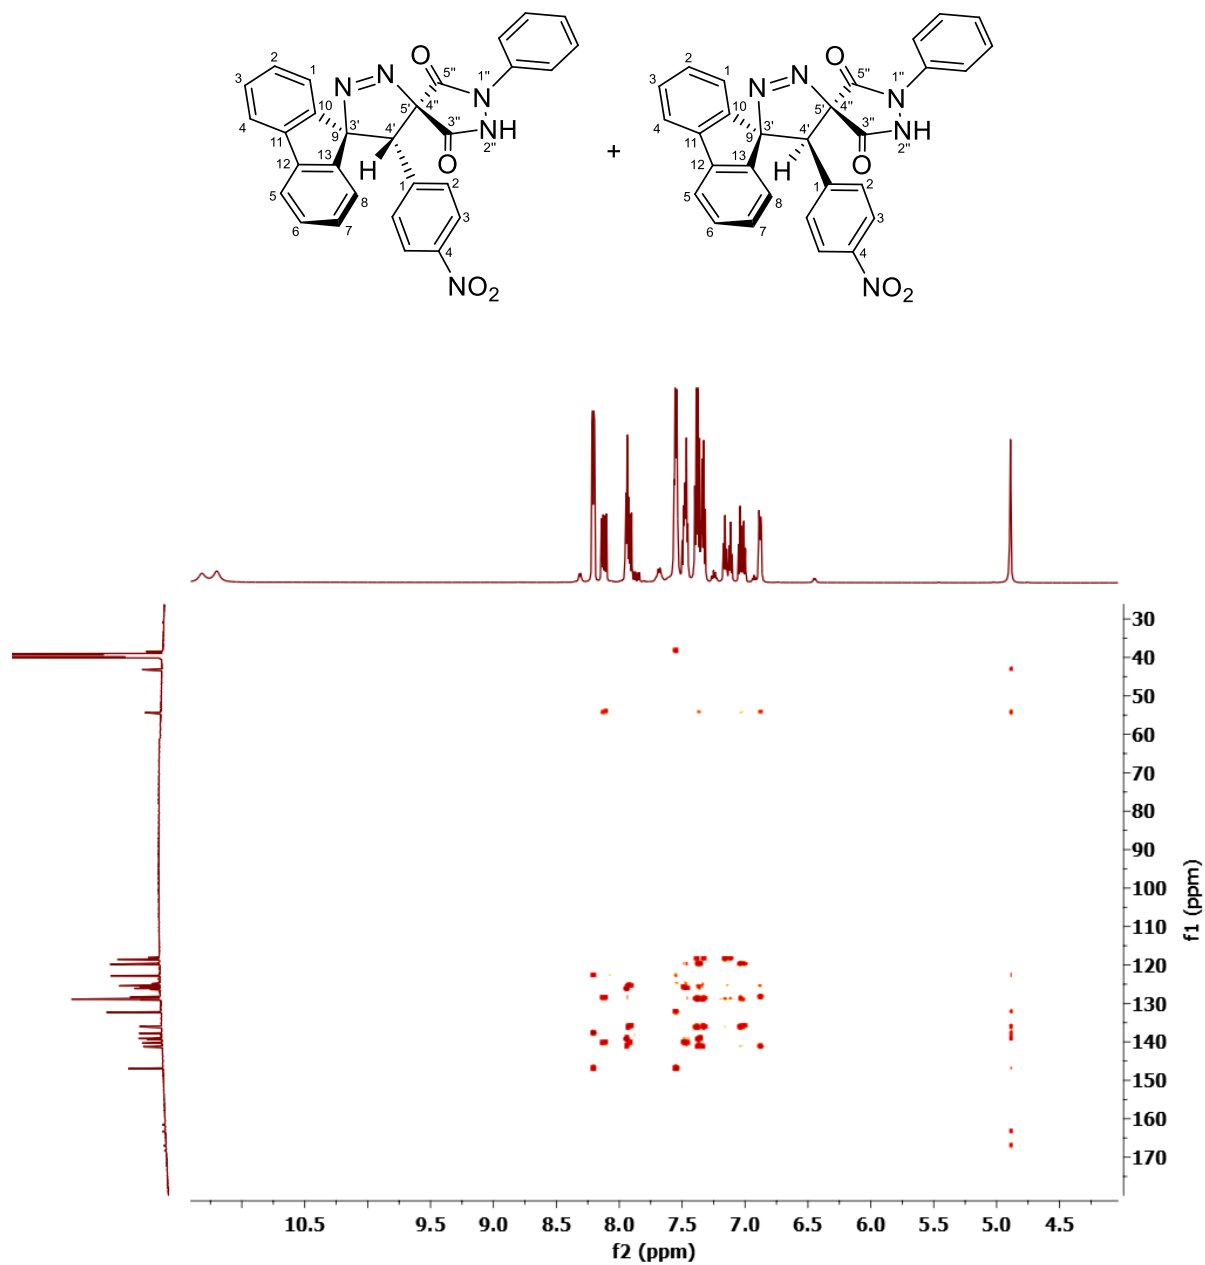

Supplement: d6ra01559j1.pdf [file d6ra01559j1.pdf]
